# Supplementary material
Source: ML conference proceedings conference paper supplement (https://openreview.net/forum?id=qRPIWtf3SE)
Supplement: supplementary_material [file supp_material.pdf › supp_material.pdf]

665  
666

# Supplementary Material for the paper “Learning single-index models via harmonic decomposition”

## Contents

|     |                                                                              |           |
|-----|------------------------------------------------------------------------------|-----------|
| 668 | <b>1 Introduction</b>                                                        | <b>1</b>  |
| 669 | 1.1 Summary of main results . . . . .                                        | 2         |
| 670 | <b>2 Setting and definitions</b>                                             | <b>4</b>  |
| 671 | <b>3 Learning spherical single-index models</b>                              | <b>5</b>  |
| 672 | <b>4 Learning Gaussian single-index models</b>                               | <b>8</b>  |
| 673 | <b>5 Conclusion</b>                                                          | <b>9</b>  |
| 674 | <b>A Additional discussions and details from the main text</b>               | <b>20</b> |
| 675 | A.1 Discussion on learning spherical SIMs . . . . .                          | 20        |
| 676 | A.2 Discussion on learning Gaussian SIMs . . . . .                           | 22        |
| 677 | A.3 Correlation queries and the information exponent . . . . .               | 25        |
| 678 | <b>B Harmonic analysis on the sphere</b>                                     | <b>26</b> |
| 679 | B.1 Spherical harmonics, Gegenbauer and Hermite polynomials . . . . .        | 26        |
| 680 | B.2 Harmonic decomposition of Hermite into Gegenbauer polynomials . . . . .  | 27        |
| 681 | B.3 Proof of Proposition 2 . . . . .                                         | 30        |
| 682 | <b>C Statistical Query (SQ) and Low-Degree Polynomial (LDP) lower bounds</b> | <b>32</b> |
| 683 | C.1 Statistical Query lower bounds . . . . .                                 | 32        |
| 684 | C.1.1 Proof of Lemma 4 . . . . .                                             | 33        |
| 685 | C.2 Low-Degree Polynomial lower bounds . . . . .                             | 34        |
| 686 | C.2.1 Proof of Theorem 3 . . . . .                                           | 36        |
| 687 | <b>D Spectral estimators</b>                                                 | <b>37</b> |
| 688 | D.1 Analysis of $\ell = 2$ . . . . .                                         | 37        |
| 689 | D.2 Analysis for $\ell = 1$ . . . . .                                        | 40        |
| 690 | D.3 Boosting the overlap to achieve weak recovery . . . . .                  | 42        |
| 691 | <b>E Online SGD estimator</b>                                                | <b>45</b> |
| 692 | E.1 Proof of Lemma 10 . . . . .                                              | 47        |
| 693 | E.2 Proof of Proposition 4 . . . . .                                         | 47        |
| 694 | <b>F Harmonic tensor unfolding</b>                                           | <b>50</b> |
| 695 | F.1 Preliminaries on Harmonic tensors. . . . .                               | 51        |
| 696 | F.2 Proof of Theorem 6 for even case. . . . .                                | 53        |

|     |                                                  |           |
|-----|--------------------------------------------------|-----------|
| 697 | F.3 Proof of Proposition 6 for odd case. . . . . | 57        |
| 698 | F.4 Proof of the lemmas. . . . .                 | 58        |
| 699 | <b>G Proofs for Gaussian SIMs</b>                | <b>63</b> |
| 700 | <b>H Information-theoretic sample complexity</b> | <b>66</b> |
| 701 | <b>I Additional technical results</b>            | <b>67</b> |
| 702 | <b>References</b>                                | <b>69</b> |

## 703 A Additional discussions and details from the main text

### 704 A.1 Discussion on learning spherical SIMs

705 **Likelihood ratio.** In our Definition 1, we consider spherical SIMs such that  $\nu_d \ll \nu_{d,0}$  and the  
706 associated Radon-Nikodym derivative satisfies  $\|\frac{d\nu_d}{d\nu_{d,0}}\|_{L^2(\nu_{d,0})} < \infty$ . We can expand the likelihood  
707 ratio in  $L^2(\nu_{d,0})$  into the Gegenbauer basis:

$$\frac{d\nu_d}{d\nu_{d,0}}(y, r, z) \stackrel{L^2(\nu_{d,0})}{=} 1 + \sum_{\ell=1}^{\infty} \xi_{d,\ell}(y, r) Q_{\ell}(z), \quad (18)$$

where

$$\xi_{d,\ell}(Y, R) := \mathbb{E}_{Z \sim \tau_{d,1}} \left[ \frac{d\nu_d}{d\nu_{d,0}}(Y, R, Z) Q_{\ell}(Z) \right] = \mathbb{E}_{\nu_d} [Q_{\ell}(Z) | Y, R].$$

The mutual  $\chi^2$ -mutual information divergence of  $((Y, R), Z)$  is given by

$$I_{\chi^2}[\nu_d] = \mathbb{E}_{\nu_{d,0}} \left[ \left( \frac{d\nu_d}{d\nu_{d,0}} \right)^2 \right] - 1 = \sum_{\ell=1}^{\infty} \|\xi_{d,\ell}\|_{L^2}^2.$$

708 **Link function  $\nu_d$  unknown.** When  $\nu_d$  is unknown, similar to [15], one can still hope to learn the  
709 planted direction  $\mathbf{w}_*$ , as long as it is possible to approximate the non-linearity  $\mathcal{T}_{\ell}(y, r)$  using random  
710 linear combinations of the first few orthogonal functions in a basis of  $L^2(\nu_{d,Y,R})$ . Similar to [15,  
711 Assumption 4.1] this requires assuming that the expansion of  $\mathcal{T}_{\ell}$  has non-vanishing mass on these  
712 first few basis functions of  $L^2(\nu_{d,Y,R})$ . Intuitively, this amounts to a ‘smoothness’ condition on the  
713 link function  $\nu_d$ . We leave this as a direction for future work.

714 **Weak to strong recovery.** In our framework, it is only meaningful to restrict ourselves to the  
715 sequence  $\{\nu_d\}_{d \geq 1}$  such that  $I_{\chi^2}[\nu_d]$  is non-vanishing and there exists a component  $\ell \geq 1$  (independent  
716 of  $d$ ) such that  $\|\xi_{d,\ell}\|_{L^2} > c > 0$ . For example, in Gaussian SIMs with the generative exponent  $k_*$ ,  
717 such an  $\ell = k_*$  always (both with or without using the norm). Under this mild assumption, we can  
718 carry out the online SGD algorithm similar to the final phase algorithms of [2, 14, 49] but now on  
719 the frequency  $Q_{\ell}$ . As we have non-vanishing signal  $\|\xi_{d,\ell}\| = \Omega_d(1)$ , we can achieve strong recovery  
720  $|\langle \hat{\mathbf{w}}, \mathbf{w}_* \rangle| \geq 1 - \varepsilon$  using  $O(d/\varepsilon)$  samples, and so  $O(d^2/\varepsilon)$  runtime hiding constants in  $\ell$ .

721 **Spherical SIMs with sample-runtime trade-off.** Below we show how to construct examples of  
722 spherical single-index models with  $\mathfrak{l}_{m,*} > \mathfrak{l}_{T,*}$ . We construct  $\nu_d$  such that it is a mixture of two  
723 spherical SIMs. Consider  $\nu_d^{(1)}$  and  $\nu_d^{(2)}$  associated to two Gaussian SIMs with generative exponents  
724  $k_1$  and  $k_2$ , where we marginalized over the norm (that is,  $R = 1$ ). In particular, as shown in [15,  
725 Theorem 5.1], we can choose the Gaussian SIMs to be  $y^{(j)} = \sigma_j(R \cdot Z) + \tau N(0, 1)$ , with  $\|\sigma_j\|_{\infty} < \infty$   
726 and  $\tau$  sufficiently large such that  $C^{-1} \leq \nu_d^{(1)}(y)/\nu_d^{(2)}(y) \leq C$ .

727 Assume that  $(Y, Z) \sim \nu_d$  (recall  $R = 1$  here, and we remove it for clarity) is drawn with probability  
728  $d^{-\alpha}$  from  $\nu_d^{(1)}$  and with probability  $1 - d^{-\alpha}$  from  $\nu_d^{(2)}$ , where  $\alpha > 0$  is a constant chosen later. In

729 this model, we have

$$\xi_{d,\ell}(Y) = \mathbb{E}_{\nu_d}[Q_\ell(Z)|Y] = d^{-\alpha} C_\alpha^{(1)}(Y) \xi_{d,\ell}^{(1)}(Y) + C_\alpha^{(2)}(Y) \xi_{d,\ell}^{(2)}(Y),$$

730 where

$$\xi_{d,\ell}^{(1)}(Y) = \mathbb{E}_{\nu_d^{(1)}}[Q_\ell(Z)|Y], \quad \xi_{d,\ell}^{(2)}(Y) = \mathbb{E}_{\nu_d^{(2)}}[Q_\ell(Z)|Y],$$

731 and

$$C_\alpha^{(1)}(Y) = \frac{1}{d^{-\alpha} + (d^\alpha - 1)\nu_d^{(2)}(Y)/\nu_d^{(1)}(Y)}, \quad C_\alpha^{(2)}(Y) = \frac{1}{d^{-\alpha}\nu_d^{(1)}(Y)/\nu_d^{(2)}(Y) + 1 - d^{-\alpha}}.$$

732 From our choice of  $\nu_d^{(j)}$ , there exists a constant  $C$ , such that for  $d \geq C$ , we have  $C^{-1} \leq$   
 733  $C_\alpha^{(1)}(y), C_\alpha^{(2)}(y) \leq C$  for all  $y \in \mathbb{R}$ . We deduce that there exist a constant  $\tilde{C}$  sufficiently large but  
 734 independent of  $d$  such that

$$\begin{aligned} \|\xi_{d,\ell}\|_{L^2}^2 &\leq \tilde{C} \max(d^{-2\alpha} \|\xi_{d,\ell}^{(1)}\|_{L^2}^2, \|\xi_{d,\ell}^{(2)}\|_{L^2}^2), \\ \|\xi_{d,\ell}\|_{L^2}^2 &\geq \tilde{C}^{-1} \max\left(d^{-2\alpha} \|\xi_{d,\ell}^{(1)}\|_{L^2}^2 - \tilde{C}^2 \|\xi_{d,\ell}^{(2)}\|_{L^2}^2, \|\xi_{d,\ell}^{(2)}\|_{L^2}^2 - \tilde{C}^2 d^{-2\alpha} \|\xi_{d,\ell}^{(1)}\|_{L^2}^2\right), \end{aligned} \quad (19)$$

735 where the  $L^2$ -norms are with respect to the associated nulls  $\nu_{d,0}$ ,  $\nu_{d,0}^{(1)}$ , and  $\nu_{d,0}^{(2)}$ .

736 Consider  $k_*$  a multiple of 10 for simplicity, and set  $k_2 = k_*$ ,  $k_1 = 2k_*/5$ , and  $\alpha = k_*/5$ . Using  
 737 Lemma 2, we can bound the contributions from  $\nu_d^{(1)}$  and  $\nu_d^{(2)}$ :

- Consider the contributions of  $\nu_d^{(1)}$  to the sample and runtime complexity:

– Sample complexity:

$$\begin{aligned} \ell \leq k_1, \ell \equiv k_1[2] : \quad & d^{2\alpha} \frac{\sqrt{n_{d,\ell}}}{\|\xi_{d,\ell}^{(1)}\|_{L^2}^2} \asymp d^{2k_1 - \ell/2} = d^{4k_*/5 - \ell/2}, \\ \ell \leq k_1, \ell \not\equiv k_1[2] : \quad & d^{2\alpha} \frac{\sqrt{n_{d,\ell}}}{\|\xi_{d,\ell}^{(1)}\|_{L^2}^2} \asymp d^{2k_1 - \ell/2 + 1} = d^{4k_*/5 - \ell/2 + 1}, \\ \ell > k_1 : \quad & d^{2\alpha} \frac{\sqrt{n_{d,\ell}}}{\|\xi_{d,\ell}^{(1)}\|_{L^2}^2} \gtrsim d^{k_1 + \ell/2} = d^{2k_*/5 + \ell/2}. \end{aligned} \quad (20)$$

740 Thus the optimal sample complexity is achieved at degree  $\ell = k_1 = 2k_*/5$  with  $d^{3k_*/5}$   
 741 lower bound.

– Runtime complexity:

$$\begin{aligned} \ell \leq k_1, \ell \equiv k_1[2] : \quad & d^{2\alpha} \frac{n_{d,\ell}}{\|\xi_{d,\ell}^{(1)}\|_{L^2}^2} \asymp d^{2k_1} = d^{4k_*/5}, \\ \ell \leq k_1, \ell \not\equiv k_1[2] : \quad & d^{2\alpha} \frac{n_{d,\ell}}{\|\xi_{d,\ell}^{(1)}\|_{L^2}^2} \asymp d^{2k_1 + 1} = d^{4k_*/5 + 1}, \\ \ell > k_1 : \quad & d^{2\alpha} \frac{n_{d,\ell}}{\|\xi_{d,\ell}^{(1)}\|_{L^2}^2} \gtrsim d^{k_1 + \ell} = d^{2k_*/5 + \ell}. \end{aligned} \quad (21)$$

743 Thus the optimal runtime complexity is achieved at degrees  $\ell \leq k_1 = 2k_*/5, \ell \equiv k_1[2]$   
 744 with  $d^{4k_*/5}$  lower bound.

- Consider the contributions of  $\nu_d^{(2)}$  to the sample and runtime complexity:

– Sample complexity:

$$\begin{aligned} \ell \leq k_2, \ell \equiv k_2[2] : \quad & \frac{\sqrt{n_{d,\ell}}}{\|\xi_{d,\ell}^{(2)}\|_{L^2}^2} \asymp d^{k_2 - \ell/2} = d^{k_* - \ell/2}, \\ \ell \leq k_2, \ell \not\equiv k_2[2] : \quad & \frac{\sqrt{n_{d,\ell}}}{\|\xi_{d,\ell}^{(2)}\|_{L^2}^2} \asymp d^{k_2 - \ell/2 + 1} = d^{k_* - \ell/2 + 1}, \\ \ell > k_2 : \quad & \frac{\sqrt{n_{d,\ell}}}{\|\xi_{d,\ell}^{(2)}\|_{L^2}^2} \gtrsim d^{\ell/2}. \end{aligned} \quad (22)$$

Thus the optimal sample complexity is achieved at degree  $\ell = k_2 = k_*$  with  $d^{k_*/2}$  lower bound.

– Runtime complexity:

$$\begin{aligned} \ell \leq k_2, \ell \equiv k_2[2] : & \quad \frac{n_{d,\ell}}{\|\xi_{d,\ell}^{(2)}\|_{L^2}^2} \asymp d^{k_2} = d^{k_*}, \\ \ell \leq k_2, \ell \not\equiv k_2[2] : & \quad \frac{n_{d,\ell}}{\|\xi_{d,\ell}^{(2)}\|_{L^2}^2} \asymp d^{k_2+1} = d^{k_*+1}, \\ \ell > k_2 : & \quad \frac{n_{d,\ell}}{\|\xi_{d,\ell}^{(2)}\|_{L^2}^2} \gtrsim d^\ell. \end{aligned} \quad (23)$$

Thus the optimal runtime complexity is achieved at degrees  $\ell \leq k_2 = k_*$ ,  $\ell \equiv k_2[2]$  with  $d^{k_*}$  lower bound.

From the bounds (19), the sample or runtime complexity for each  $\ell$  is the minimum of the two contributions associated to  $\nu_d^{(1)}$  and  $\nu_d^{(2)}$ . We deduce that in this model:

- Optimal sample complexity is achieved at degree  $\ell_{m,*} = k_*$ , with a matching algorithm that succeeds with  $m = \Theta_d(d^{k_*/2})$  samples and  $T = \Theta(d^{k_*})$  runtime (thanks to contribution  $\nu_d^{(2)}$ ).
- Optimal runtime is achieved at degrees  $\ell_{T,*} = \ell$  with  $\ell \leq 2k_*/5$  with  $\ell \equiv 2k_*/5[2]$ . For example, choosing  $\ell_{T,*} = 2k_*/5$ , we have a matching algorithm that succeeds with  $T = \Theta_d(d^{4k_*/5})$  runtime and  $m = \Theta_d(d^{3k_*/5})$  samples (thanks to contribution  $\nu_d^{(1)}$ ).

We conjecture that for this distribution  $\nu_d$ , no algorithm exists that achieves both optimal sample complexity  $m = \Theta_d(d^{k_*/2})$  and optimal runtime complexity  $T = \Theta_d(d^{4k_*/5})$ . Further note, that by choosing intermediary degrees  $\ell$ , one can trade-off sample and runtime complexity.

## A.2 Discussion on learning Gaussian SIMs

Consider learning a Gaussian single-index model (1) with link function  $\rho \in \mathcal{P}(\mathbb{R}^2)$  and generative exponent  $k_* := k_*(\rho)$ . Recall the definition from [15]:

$$k_*(\rho) = \arg \min \{k \geq 1 : \|\zeta_k\|_{L^2(\rho)} > 0 \text{ where } \zeta_k(Y) := \mathbb{E}_\rho[\text{He}_k(G)|Y]\}. \quad (24)$$

In light of our results on learning general spherical SIMs via harmonic decomposition (Section 3), we revisit the three algorithms for learning Gaussian SIMs mentioned in the introduction [2, 14, 15], and reinterpret their behavior through the lens of spherical harmonics.

Throughout, let  $\mathcal{T}_* : \mathbb{R} \rightarrow \mathbb{R}$  be a transformation of the label satisfying:

$$\|\mathcal{T}_*\|_{L^2} = 1, \quad \|\mathcal{T}_*\|_\infty \leq C, \quad \Gamma_{k_*} := \mathbb{E}_\rho[\mathcal{T}_*(Y)\text{He}_{k_*}(G)] \geq \frac{1}{C} \|\zeta_{k_*}\|_{L^2}.$$

Such transformations always exist (see [15, Lemma F.2]). Informally, one can construct  $\mathcal{T}_*$  by truncating  $\zeta_{k_*}/\|\zeta_{k_*}\|_{L^2}$  (with truncation at large enough value as to approximately preserve the correlation with  $\text{He}_{k_*}$ ).

**Online SGD with Hermite neuron.** In a seminal paper, Ben Arous et al. [2] studied online SGD on a non-convex loss over  $\mathbf{w} \in \mathbb{S}^{d-1}$ , with planted signal  $\mathbf{w}_*$  and a  $k_*$ -order saddle at the equator  $\langle \mathbf{w}, \mathbf{w}_* \rangle = 0$ . Adapting their results to the task of learning Gaussian SIMs, their algorithm performs online SGD on the population loss

$$\min_{\mathbf{w} \in \mathbb{S}^{d-1}} \mathcal{L}(\mathbf{w}) := \mathbb{E}_{(y,\mathbf{x}) \sim \mathbb{P}_{\mathbf{w}_*}} \left[ \left( \mathcal{T}_*(y) - \text{He}_{k_*}(\langle \mathbf{w}, \mathbf{x} \rangle) \right)^2 \right], \quad (\text{HeSGD})$$

and succeeds with suboptimal  $m = \tilde{\Theta}_d(d^{k_*-1})$  samples and  $T = \tilde{\Theta}_d(d^{k_*})$ .

We now reinterpret this result through the lens of harmonic decomposition. The following informal observations aim to build intuition rather than make formal statements:

**Observation 1** (Informal, harmonic structure of the loss). When  $|\langle \mathbf{w}, \mathbf{w}_* \rangle| \gtrsim d^{-1/2}$ , the loss landscape  $\mathcal{L}(\mathbf{w})$  is dominated by degree- $k_*$  spherical harmonics. The resulting SGD dynamics behaves similarly to online SGD using  $Q_{k_*}(\langle \mathbf{w}, \mathbf{z} \rangle)$  in place of  $\text{He}_{k_*}(\langle \mathbf{w}, \mathbf{x} \rangle)$ .

This suggests that algorithm (HeSGD) effectively restricts itself to the degree- $k_*$  subspace  $V_{d,k_*}$ . As a consequence, we expect its performance to be constrained by the query complexity lower bound  $\Omega_d(d^{k_*})$ , and its behavior to be similar to the degree- $k_*$  online SGD estimator (SGD-Alg) in Section 3. We further provide an alternative perspective that highlights the role of the norm  $\|\mathbf{x}\|_2$  of the input data in learning Gaussian SIMs:

**Observation 2** (Informal, norm-invariance of dynamics). The SGD dynamics of [2] remains essentially the same if the input  $\mathbf{x}$  is replaced by  $\tilde{r} \cdot \mathbf{x} / \|\mathbf{x}\|_2$ , where  $\tilde{r} \sim \chi_d$  is sampled independently.

This indicates that the algorithm does not exploit the radial component  $\|\mathbf{x}\|_2$ , and effectively operates on the normalized direction  $\mathbf{z} = \mathbf{x} / \|\mathbf{x}\|_2$ . From our theory (Section 4), any such estimator incurs a query complexity of  $\Omega_d(d^{k_*})$ . In this sense, algorithm (HeSGD) is runtime-optimal among methods that ignore radial information.

**Landscape smoothing.** To address the suboptimality of (HeSGD), Damian et al. [14] introduced a landscape smoothing operator that averages the loss on a sphere around each parameter  $\mathbf{w} \in \mathbb{S}^{d-1}$ :

$$\min_{\mathbf{w} \in \mathbb{S}^{d-1}} \mathbb{E}_{\mathbf{u} \sim \text{Unif}(\mathbb{S}^{d-1})} \left[ \mathcal{L} \left( \frac{\mathbf{w} + \lambda \mathbf{u}}{\|\mathbf{w} + \lambda \mathbf{u}\|_2} \right) \right]. \quad (\text{SmLD})$$

This modification achieves near-optimal complexities:  $m = \tilde{\Theta}_d(d^{k_*/2})$  and  $T = \tilde{\Theta}_d(d^{k_*/2+1})$ .

**Observation 3** (Informal, low-pass filtering effect). Landscape smoothing suppresses high-frequency components of the loss, effectively amplifying lower-degree harmonics. The initial phase of SGD dynamics behaves essentially like optimization over  $Q_1(\langle \mathbf{w}, \mathbf{z} \rangle)$  and  $Q_2(\langle \mathbf{w}, \mathbf{z} \rangle)$ .

Thus, smoothing can be interpreted as projecting the dynamics onto low-degree harmonic components—specifically, the statistics of the spectral algorithm (SP-Alg) associated to spherical harmonics of degree  $\ell \in \{1, 2\}$ . In this sense, the first phase of the dynamics on (SmLD) essentially corresponds to running SGD on the optimal spectral estimator (SP-Alg).

**Partial trace estimator.** In a subsequent work, Damian et al. [15] proposed an estimator based on the partial trace of a Hermite tensor, inspired by techniques from tensor PCA. Their construction begins with the empirical Hermite tensor:

$$\hat{\mathbf{T}} := \frac{1}{m} \sum_{i \in [m]} \mathcal{T}_*(y_i) \text{He}_{k_*}(\mathbf{x}_i) \in (\mathbb{R}^d)^{\otimes k_*}, \quad (25)$$

where  $\text{He}_{k_*}(\mathbf{x})$  denotes the rank- $k_*$  multivariate Hermite tensor, and  $\mathcal{T}_*$  is the transformation defined earlier. The expectation  $\mathbb{E}[\hat{\mathbf{T}}]$  is proportional to  $\mathbf{w}_*^{\otimes k_*}$ . To extract this principal component, they compute a *partial trace* of the empirical tensor by contracting  $\hat{\mathbf{T}}$  with identity tensors. This results in an empirical vector or matrix, depending on whether  $k_*$  is odd or even. The resulting estimator is

$$\begin{aligned} k_* \text{ odd: } \quad \hat{\mathbf{w}}_0 &= \frac{\hat{\mathbf{v}}}{\|\hat{\mathbf{v}}\|_2}, & \hat{\mathbf{v}} &:= \frac{1}{m} \sum_{i \in [m]} \mathcal{T}_*(y_i) P_{k_*}(\|\mathbf{x}_i\|_2) \mathbf{x}_i, \\ k_* \text{ even: } \quad \hat{\mathbf{w}} &= \arg \max_{\mathbf{w} \in \mathbb{S}^{d-1}} \mathbf{w}^\top \hat{\mathbf{M}} \mathbf{w}, & \hat{\mathbf{M}} &:= \frac{1}{m} \sum_{i=1}^m \mathcal{T}_*(y_i) P_{k_*}(\|\mathbf{x}_i\|_2) [\mathbf{x}_i \mathbf{x}_i^\top - \mathbf{I}_d], \end{aligned} \quad (\text{PrTR})$$

where  $P_{k_*}$  is a univariate polynomial derived from the contraction of the Hermite tensor. In the odd case, a second refinement phase (see Section D) is used to boost  $\hat{\mathbf{w}}_0$  from  $d^{-1/4}$  to constant correlation with  $\mathbf{w}_*$ . This estimator achieves the optimal sample complexity  $\Theta_d(d^{k_*/2})$  and optimal runtime  $\Theta_d(d^{k_*/2+1})$ , matching the lower bounds for learning Gaussian SIMs (see Eq. (3)).

Importantly, estimator (PrTR) corresponds precisely to the general spectral estimator (SP-Alg), associated to the optimal degree  $\ell \in \{1, 2\}$  harmonic subspaces, using

$$\mathcal{T}_\ell(y, r) = \mathcal{T}_*(y) P_{k_*}(r) \quad \text{with } \ell = 1 \text{ if } k_* \text{ is odd, and } \ell = 2 \text{ if } k_* \text{ is even.}$$

817 **Observation 4** (Informal, lower-frequency projection). *Partial trace effectively projects the high-*  
818 *degree Hermite tensor onto lower-degree spherical harmonic subspaces ( $\ell = 1$  or 2 for partial trace*  
819 *over all but 1 or 2 coordinates).*

820 Although our estimator recovers (PrTR) in the Gaussian case, we emphasize that its derivation is very  
821 different (including constructing the non-linearity  $\mathcal{T}_\ell(y, r)$ , see Appendix G). We construct it directly  
822 from rotational invariance and harmonic decomposition, without relying on prior knowledge of tensor  
823 PCA, contractions of Hermite tensors, or Gaussian-specific identities. We believe this alternative,  
824 transparent derivation of (PrTR) highlights the advantages of the harmonic perspective when learning  
825 single-index models.

826 **Remark A.1.** Both landscape smoothing [7] and partial trace estimators [25] originate in the tensor  
827 PCA literature, where a similar gap between ‘local’ and optimal algorithms arises—with  $d^{k_*/2}$   
828 versus  $d^{k_*-1}$  gap in signal strength. It is intriguing to connect the phenomena observed in SIMs  
829 (Observations 3 and 4) to analogous behaviors in tensor PCA. We leave this direction for future work.

830 Next, we provide quick computations to justify the above observations.

831 **Observation 1: harmonic decomposition of the loss.** First, note that

$$\mathcal{L}(\mathbf{w}) = 2 - 2\beta_{k_*} \mathbb{E}_{\mathbf{x}}[\text{He}_{k_*}(\langle \mathbf{w}_*, \mathbf{x} \rangle) \text{He}_{k_*}(\langle \mathbf{w}, \mathbf{x} \rangle)] = 2 - 2\Gamma_{k_*} \langle \mathbf{w}_*, \mathbf{w} \rangle^k,$$

832 and it is enough to consider the correlation loss. Let’s decompose the landscape into contributions  
833 from the different harmonic subspaces: using the Hermite to Gegenbauer polynomial decomposition  
834 in Eq. (17), we get

$$\begin{aligned} \mathbb{E}_{\mathbf{x}}[\text{He}_{k_*}(\langle \mathbf{w}_*, \mathbf{x} \rangle) \text{He}_{k_*}(\langle \mathbf{w}, \mathbf{x} \rangle)] &= \sum_{\substack{\ell \leq k_* \\ \ell \equiv k_* [2]}} \mathbb{E}[\beta_{k_*, \ell}(r)^2] \mathbb{E}[Q_\ell(\langle \mathbf{w}_*, \mathbf{z} \rangle) Q_\ell(\langle \mathbf{w}, \mathbf{z} \rangle)] \\ &= \sum_{\substack{\ell \leq k_* \\ \ell \equiv k_* [2]}} \frac{\|\beta_{k_*, \ell}\|_{L^2}^2}{\sqrt{n_{d, \ell}}} Q_\ell(\langle \mathbf{w}, \mathbf{w}_* \rangle), \end{aligned} \quad (26)$$

835 where  $\|\beta_{k_*, \ell}\|_{L^2}^2 / \sqrt{n_{d, \ell}} = \Theta_d(d^{-k_*/2})$  (see Appendix B). For  $|\langle \mathbf{w}_*, \mathbf{w} \rangle| \geq C_{k_*} d^{-1/2}$ , the leading  
836 contribution in the loss (and its gradient) is  $\ell = k_*$  (recall that the leading term in  $Q_\ell(\langle \mathbf{w}, \mathbf{w}_* \rangle)$   
837 is  $\Theta_d(d^{\ell/2}) \langle \mathbf{w}, \mathbf{w}_* \rangle^\ell$ ). Informally, this implies that we could have replaced  $\text{He}_{k_*}(\langle \mathbf{w}_*, \mathbf{x} \rangle)$  by  
838  $Q_{k_*}(\langle \mathbf{w}_*, \mathbf{z} \rangle)$  in the above loss.

839 **Observation 2: dynamics with independent norm.** Let’s consider the loss (26) when we have  
840 independent norms between the input and the signal:

$$\mathbb{E}[\text{He}_{k_*}(r \cdot \langle \mathbf{w}_*, \mathbf{z} \rangle) \text{He}_{k_*}(\tilde{r} \cdot \langle \mathbf{w}, \mathbf{z} \rangle)] = \sum_{\substack{\ell \leq k_* \\ \ell \equiv k_* [2]}} \frac{\mathbb{E}[\beta_{k_*, \ell}(r)^2]}{\sqrt{n_{d, \ell}}} Q_\ell(\langle \mathbf{w}, \mathbf{w}_* \rangle), \quad (27)$$

841 where  $\mathbb{E}[\beta_{k_*, \ell}(r)^2] / \sqrt{n_{d, \ell}} = \Theta_d(d^{-k_* + \ell/2})$  (see Appendix B). In particular, the leading term  $\ell = k_*$   
842 remain the same between Eq. (27) and Eq. (26). Following the proof in [2] (see Section E), the  
843 dynamics with same hyperparameters behaves similarly between the two losses (27) and (26).

844 **Observation 3: low-pass filtering of landscape smoothing.** Again, it is enough to directly consider  
845 the correlation term. Let’s decompose

$$\mathbb{E}_{\mathbf{u} \sim \tau_d} \mathbb{E}_{\mathbf{x}} \left[ \text{He}_{k_*}(\langle \mathbf{w}_*, \mathbf{x} \rangle) \text{He}_{k_*} \left( \frac{\mathbf{w} + \lambda \mathbf{u}}{\|\mathbf{w} + \lambda \mathbf{u}\|_2} \cdot \mathbf{x} \right) \right] = \sum_{\substack{\ell \leq k_* \\ \ell \equiv k_* [2]}} m_\ell(\lambda) \frac{\|\beta_{k_*, \ell}\|_{L^2}^2}{\sqrt{n_{d, \ell}}} Q_\ell(\langle \mathbf{w}, \mathbf{w}_* \rangle),$$

846 where each frequency (26) in the original loss  $\mathcal{L}(\mathbf{w})$  is now reweighted by

$$m_\ell(\lambda) = \frac{1}{\sqrt{n_{d, \ell}}} \mathbb{E}_{\mathbf{u}} \left[ Q_\ell \left( \frac{\mathbf{w} + \lambda \mathbf{u}}{\|\mathbf{w} + \lambda \mathbf{u}\|_2} \cdot \mathbf{w} \right) \right] = \frac{1}{\sqrt{n_{d, \ell}}} \mathbb{E}_{Z \sim \tau_{d, 1}} \left[ Q_\ell \left( \frac{1 + \lambda Z}{\sqrt{1 + 2\lambda Z + \lambda^2}} \right) \right].$$

847 When  $\lambda = 0$ , we indeed have  $m_\ell(0) = Q_\ell(1) / \sqrt{n_{d, \ell}} = 1$ . For  $\lambda \gg 1$ , we have  $m_\ell(\lambda) \asymp 1/\lambda^\ell$ , and  
848 as long as  $|\langle \mathbf{w}, \mathbf{w}_* \rangle| \ll \lambda^{-1}$ , the loss (and its gradient) are dominated by frequencies  $\ell \in \{1, 2\}$ .

### 849 A.3 Correlation queries and the information exponent

850 In the main text, we focused on the *generative exponent* introduced by [15]: this notion tightly capture  
 851 the optimal complexity of learning Gaussian single-index models among Statistical Query and Low-  
 852 Degree Polynomial algorithms. An earlier notion—the *information exponent*—was proposed in  
 853 [21, 2]. Specifically, for scalar labels  $\mathcal{Y} \subseteq \mathbb{R}$ , the *information exponent* (IE) of  $\rho$  is defined by

$$k_1(\rho) = \arg \min \{k \geq 1 : \mathbb{E}_\rho[Y \text{He}_k(G)] \neq 0\}. \quad (28)$$

854 This exponent captures the complexity of learning with so-called *correlation statistical query* (CSQ)  
 855 algorithms, which only access labels through correlation statistics  $y\phi(\mathbf{x})$ . In other words, using the  
 856 terminology introduced in Appendix C.1, it captures the complexity of  $\mathcal{Q}$ -restricted SQ algorithms,  
 857 with

$$\mathcal{Q} = \mathcal{Q}_{\text{CSQ}} := \{\phi(y, \mathbf{x}) = y\tilde{\phi}(\mathbf{x}) : \tilde{\phi} \text{ measurable function}\}.$$

858 We denote  $\text{CSQ}(q, \tau) := \mathcal{Q}_{\text{CSQ}}\text{-SQ}(q, \tau)$  this restricted class of SQ algorithms.

859 For CSQ algorithm, Damian et al. [14] showed lower bounds within the  $\mathcal{Q}$ -SQ framework of

$$m = \Theta_d(d^{k_1(\rho)/2}), \quad T = \Theta_d(d^{k_1(\rho)/2+1}). \quad (29)$$

860 Note however, that only the generative exponent reflects the fundamental hardness of the learning  
 861 task: indeed, we always have  $k_*(\rho) \leq k_1(\rho)$ , with  $k_*(\rho)$  always one or two for all  $y$  polynomial  
 862 function of  $\mathbf{x}$  (while  $k_1(\rho) = k$  if  $y = \text{He}_k(G)$ ). In the case  $k_*(\rho) < k_1(\rho)$ , the complexity predicted  
 863 by the information exponent can be improved upon by using non-correlation queries, such as using  
 864 a non-correlation loss [15] or by reusing samples [18]. Nonetheless, IE remains relevant in several  
 865 natural settings, such as online stochastic gradient descent on the squared or cross-entropy loss.

866 Below, we discuss how to recover this information exponent from our harmonic framework when  
 867 considering  $\mathcal{Q}_{\text{CSQ}}\text{-SQ}$  algorithms. Introduce the CSQ query complexity

$$Q_\star^{\text{CSQ}}(\nu_d) = \min_{\ell \geq 1} \frac{n_{d,\ell}}{\|\xi_{d,\ell}^{\text{CSQ}}\|_{L^2}^2},$$

868 where we defined

$$\xi_{d,\ell}^{\text{CSQ}}(Y, R) := Y q_{\star,\ell}(R), \quad q_{\star,\ell}(R) := \frac{1}{\|Y\|_{L^2}} \mathbb{E}_{\nu_d}[Y Q_\ell(Z)|R].$$

869 Adapting the proofs in Appendix C.1, we obtain the following query complexity lower bound:

870 **Proposition 1** (CSQ lower bound). *Fix  $\nu_d \in \mathfrak{L}_d$ . If an algorithm  $\mathcal{A} \in \text{CSQ}(q, \tau)$  succeeds at*  
 871 *distinguishing  $\mathbb{P}_{\nu_d, \mathbf{w}}$  from  $\mathbb{P}_{\nu_d, 0}$ , then we must have*

$$q/\tau^2 \geq Q_\star^{\text{CSQ}}(\nu_d). \quad (30)$$

872 Using the non-linearity  $\mathcal{T}_\ell(Y, R) := Y q_{\star,\ell}(R)$  in our algorithms (SP-Alg), (SGD-Alg) and (TU-Alg)  
 873 described in Section 3, we can prove the same Theorem 2 with sample complexities replaced  
 874 by  $\sqrt{n_{d,\ell}}/\|\xi_{d,\ell}^{\text{CSQ}}\|_{L^2}$  and runtime complexities replaced by  $n_{d,\ell}/\|\xi_{d,\ell}^{\text{CSQ}}\|_{L^2}^2$  (one simply plug these  
 875 nonlinearities in the theorems in Appendices D, E and F).

876 Specializing to the Gaussian case, one recover the exact same result as in Section 4, but now with  $k_*$   
 877 (generative exponent) replaced by  $k_1$  (information exponent) of the Gaussian SIM  $\rho$ . In particular, for  
 878 all  $\ell \leq k_1$ , we have

$$\|\xi_{d,\ell}^{\text{CSQ}}\|_{L^2}^2 \asymp d^{-(k_1-\ell)/2} \text{ for } \ell \equiv k_1 \pmod{2} \quad \text{and} \quad \|\xi_{d,\ell}^{\text{CSQ}}\|_{L^2}^2 \lesssim d^{-(k_1-\ell+1)/2} \text{ for } \ell \not\equiv k_1 \pmod{2}.$$

879 Similarly to the generative exponent case (and general SQ), the optimal degrees for learning Gaussian  
 880 SIMs with CSQ algorithms are always achieves at  $l_{m,\star} = l_{T,\star} \in \{1, 2\}$ , with the spectral estimator  
 881 (SP-Alg) achieving

$$m = \Theta_d(d^{k_1(\rho)/2}), \quad T = \Theta_d(d^{k_1(\rho)/2+1}).$$

882 Similar results as in Section 4 hold for learning with CSQ algorithms without using the norm  $\|\mathbf{x}\|_2$ .  
 883 We note, however, that here, non-CSQ algorithms can achieve much better performance (attaining the  
 884 complexity predicted by the generative exponent).

## 885 B Harmonic analysis on the sphere

886 In this section, we mention several facts about spherical harmonics, Gegenbauer polynomials, and  
 887 their relationship. We will then discuss the harmonic decomposition of Hermite polynomials into  
 888 Gegenbauer polynomials, which would be critical in all our analyses for the isotropic Gaussian input  
 889 measure.

### 890 B.1 Spherical harmonics, Gegenbauer and Hermite polynomials

**Spherical Harmonics.** Consider the  $d$ -dimensional sphere  $\mathbb{S}^{d-1} := \{z : \|z\|_2 = 1\}$  and the uniform probability measure  $\tau_d \equiv \text{Unif}(\mathbb{S}^{d-1})$  on it. This induces a Hilbert space  $L^2(\mathbb{S}^{d-1}, \tau_d)$  equipped with the inner product:

$$\langle f, g \rangle_{L^2(\tau_d)} = \int_{z \in \mathbb{S}^{d-1}} f(z)g(z) \tau_d(dz), \quad \text{for any } f, g \in L^2(\tau_d)$$

891 For  $\ell \in \mathbb{N}$ , consider  $\tilde{V}_{d,\ell}$  be the space of degree  $\ell$  homogeneous harmonic polynomials (i.e. homoge-  
 892 neous polynomial  $q : \mathbb{R}^d \rightarrow \mathbb{R}$  with  $\Delta q(\cdot) \equiv 0$ ). Let  $V_{d,\ell}$  be the space of functions by restricting the  
 893 domain to  $\mathbb{S}^{d-1}$  of functions in  $\tilde{V}_{d,\ell}$ . A classical result from harmonic analysis (see [42, 11, 12] for  
 894 additional background) is that we can decompose

$$L^2(\mathbb{S}^{d-1}, \tau_d) = \bigoplus_{\ell=0}^{\infty} V_{d,\ell}. \quad (31)$$

The dimension of each subspace is given by:

$$\dim(V_{d,\ell}) = n_{d,\ell} = \frac{2\ell + d - 2}{d - 2} \binom{d + \ell - 3}{\ell}.$$

For each  $\ell \in \mathbb{N}$ , the orthonormal bases for  $V_{d,\ell}$  is given by  $\{Y_{\ell i}^{(d)} : i \in n_{d,\ell}\}$ . We then have the following orthogonality properties:

$$\langle Y_{\ell i}^{(d)}, Y_{k j}^{(d)} \rangle_{\nu_d} = \delta_{\ell k} \delta_{ij}.$$

**Remark B.1.** If one considers the unitary representation  $\rho : \mathcal{O}_d \rightarrow U(L^2(\mathbb{S}^{d-1}))$  of the orthogonal group  $\mathcal{O}_d = \{\mathbf{R} \in \mathbb{R}^{d \times d} : \mathbf{R}^\top \mathbf{R} = \mathbf{I}_d\}$  given by

$$\rho(\mathbf{R}) f(z) = f(\mathbf{R}^\top z),$$

895 then Eq. (31) is also a decomposition of  $L^2(\mathbb{S}^{d-1}, \tau_d)$  into a direct sum of irreducible representations  
 896 of  $\mathcal{O}_d$  (see [12] for a detailed treatment on the subject).

**Gegenbauer Polynomials.** Let  $\tau_{d,1}$  denote the marginal distribution of the first coordinate  $\langle z, e_1 \rangle$  with  $z \sim \tau_d$ . We consider the family of Gegenbauer polynomials on  $L^2([-1, 1], \tau_{d,1})$ , denoted by  $\{Q_\ell^{(d)} : \ell \in \mathbb{N}\}$ , where  $Q_\ell^{(d)}$  is the degree- $\ell$  polynomial satisfying

$$\int_{-1}^1 Q_\ell^{(d)}(z) Q_k^{(d)}(z) \tau_{d,1}(dz) = \int_{\mathbb{S}^{d-1}} Q_\ell^{(d)}(\langle z, e_1 \rangle) Q_k^{(d)}(\langle z, e_1 \rangle) \tau_d(dz) = \delta_{\ell k}.$$

897 A relationship between the spherical harmonics and Gegenbauer polynomials is as follows:

$$Q_\ell^{(d)}(\langle z, z' \rangle) = \frac{1}{\sqrt{n_{d,\ell}}} \sum_{s \in [n_{d,\ell}]} Y_{\ell s}^{(d)}(z) Y_{\ell s}^{(d)}(z'), \quad \text{for all } z, z' \in \mathbb{S}^{d-1}. \quad (32)$$

898 Another important relationship is for any  $w, v \in \mathbb{S}^{d-1}$ :

$$\left\langle Q_\ell^{(d)}(\langle \cdot, w \rangle), Q_k^{(d)}(\langle \cdot, v \rangle) \right\rangle_{\tau_{d,1}} = \frac{\delta_{\ell k} \cdot Q_\ell^{(d)}(\langle w, v \rangle)}{Q_\ell^{(d)}(1)}, \quad (33)$$

where  $Q_\ell^{(d)}(1) = \sqrt{n_{d,\ell}}$  as derived in Eq. (43) in Appendix I. We note that the normalization of Gegenbauer polynomials considered here is such that  $\|Q_\ell^{(d)}\|_{L^2(\tau_{d,1})} = 1$  holds. Another popular choice is such that the value at 1 evaluates to 1 which we shall explicitly refer by the family of polynomials  $\{P_\ell^{(d)}\}_{\ell \in \mathbb{N}}$  and The normalizing factor is such that  $P_\ell^{(d)}(\cdot) = Q_\ell^{(d)}(\cdot) / \sqrt{n_{d,\ell}}$ .

The derivative of the  $\ell^{\text{th}}$  Gegenbauer polynomial for  $\ell \geq 1$  can be expressed as

$$\frac{d}{dz} Q_\ell^{(d)}(z) = Q_\ell^{(d)}(z)' = \frac{\ell(\ell + d - 2)\sqrt{n_{d,\ell}}}{(d-1)\sqrt{B(d+2, \ell-1)}} Q_{\ell-1}^{d+2}(z) = C(d, \ell) Q_{\ell-1}^{(d+2)}(z), \quad (34)$$

where for a fixed constant  $\ell$  and growing  $d$ , we have  $C(d, \ell) = \Theta_d(\sqrt{d})$ . Let  $f \in L^2(\mathbb{S}^{d-1}, \tau_d)$  such that  $f$  is invariant by the action of  $\mathcal{O}_{w^\perp} = \{\mathbf{W} \in \mathcal{O}_d : \mathbf{W}^\top \mathbf{w} = \mathbf{w}\}$  which is the set of orthogonal matrices which keeps the direction  $\mathbf{w}$  fixed, i.e.  $f$  only depends on the projection  $\langle \mathbf{w}, \mathbf{z} \rangle$ . Then  $f$  admits the following decomposition

$$f(\mathbf{z}) = \sum_{\ell=0}^{\infty} \alpha_\ell Q_\ell^{(d)}(\langle \mathbf{w}, \mathbf{z} \rangle). \quad (35)$$

**Hermite polynomials.** Consider the probabilist's Hermite polynomials  $\{\text{He}_k : k \in \mathbb{N}\}$ , in the normalization that form an orthonormal basis of  $L^2(\mathbb{R}, \gamma)$ , where  $\gamma(dx) = \frac{e^{-x^2/2}}{\sqrt{2\pi}}$  is the standard Gaussian measure.  $\text{He}_k$  is a polynomial of degree  $k$ .

$$\mathbb{E}_{G \sim \mathcal{N}(0,1)} [\text{He}_j(G) \text{He}_k(G)] = \delta_{jk}.$$

As a consequence, for any  $g \in L^2(\mathbb{R}, \gamma)$ , we have the following decomposition

$$g(x) = \sum_{k=0}^{\infty} \mu_k(g) \text{He}_k(x), \quad \mu_k(g) = \mathbb{E}_{G \sim \mathcal{N}(0,1)} [g(G) \text{He}_k(G)].$$

## B.2 Harmonic decomposition of Hermite into Gegenbauer polynomials

We know that  $\mathbf{x} \sim \mathcal{N}(\mathbf{0}, \mathbf{I}_d)$  can be equivalently represented by

$$\mathbf{x} = \|\mathbf{x}\|_2 \cdot \frac{\mathbf{x}}{\|\mathbf{x}\|_2}, \quad \text{where } \|\mathbf{x}\|_2 =: r \sim \chi_d \text{ and } \frac{\mathbf{x}}{\|\mathbf{x}\|_2} =: \mathbf{z} \sim \text{Unif}(\mathbb{S}^{d-1}) \text{ are independent.}$$

Therefore,  $x_1 = r \cdot u_1$ , where  $x_1 \sim \mathcal{N}(0, 1)$  and  $z_1 \sim \tau_{d,1}$ . In what follows, we denote  $x = x_1$  and  $z = z_1$  for convenience. The Gegenbauer polynomials are an orthonormal basis for  $\tau_{d,1}$  and Hermite polynomials are (unnormalized) orthogonal basis for  $\mathcal{N}(0, 1)$ . Our goal is to explicitly express  $\text{He}_k(x) = \text{He}_k(r \cdot z)$  in terms Gegenbauer polynomials  $\{Q_\ell^{(d)}(z)\}$ , formalized in the following proposition.

**Proposition 2** (Decomposing Hermite into Gegenbauer). *For any  $k \in \mathbb{N}$ , we have*

$$\text{He}_k(r \cdot z) = \sum_{\ell=0}^{\infty} \beta_{k,\ell}(r) Q_\ell^{(d)}(z), \quad (36)$$

where  $\beta_{k,\ell}(r) = 0$  if  $(\ell > k)$  or  $(\ell \not\equiv k \pmod{2})$ , and otherwise

$$\beta_{k,\ell}(r) := \frac{\sqrt{k!} \sqrt{K(d, \ell)}}{(N!) 2^N} \left( \sum_{i=0}^N \frac{\binom{N}{i} (-1)^{N-i} r^{\ell+2i}}{\prod_{j=0}^{i+\ell-1} (d+2j)} \right), \quad (37)$$

where  $N = (k - \ell)/2$  and  $K(d, \ell) \asymp d^\ell$  as  $d \rightarrow \infty$  and  $\ell$  is constant, i.e.  $K(d, \ell) = \Theta_d(d^\ell)$ .

Essentially, we are decomposing the Hermite basis into the Gegenbauer polynomials, which is the correct basis for the “directional” component  $z$ , and explicitly computing the coefficients that depend on the radial component  $r$ . Such relationship is derived by technical algebraic manipulations, and in similar spirit to [34], relating Hermite and Gegenbauer polynomials. However, the precise expression is sensitive to the normalization used for Gegenbauer polynomials. Thus, we provide explicit calculations of this decomposition in Appendix I in our choice of normalization.

For our upper and lower bound analyses, in order to measure correlation of  $\text{He}_k(r \cdot z)$  with  $Q_\ell^{(d)}(z)$ , using both type of queries (with or without norm), the asymptotic bounds on the following moments of these coefficients will play an important role.

**Lemma 3.** For any fixed  $\ell \leq k \in \mathbb{N}$  with same parity, i.e.  $k \equiv \ell \pmod{2}$ , we have

$$\mathbb{E}_{r \sim \chi_d} [\beta_{k,\ell}(r)^2] \asymp d^{-\frac{(k-\ell)}{2}} \quad \text{and} \quad \mathbb{E}_{r \sim \chi_d} [\beta_{k,\ell}(r)]^2 \asymp d^{-(k-\ell)}.$$

926 In order to show this lemma, we will use the following well-known facts.

927 **Fact 1** (Moments of  $\chi_d$  distribution). For any  $p \in \mathbb{N}$ , the even and odd moments of  $\chi_d$  distribution  
928 are given by,

$$\mathbb{E}_{r \sim \chi_d} [r^{2p}] = \prod_{j=0}^{p-1} (d+2j) \quad \text{and} \quad \mathbb{E}_{r \sim \chi_d} [r^{2p+1}] = \mathbb{E}[r] \prod_{j=0}^{p-1} (d+2j+1) = \frac{\sqrt{2} \Gamma(\frac{d+1}{2})}{\Gamma(d/2)} \prod_{j=0}^{p-1} (d+2j+1) \quad (38)$$

Therefore, for any fixed  $m \in \mathbb{N}$ , the asymptotic behavior of the  $m^{\text{th}}$  moment as  $d \rightarrow \infty$  is given by

$$\mathbb{E}_{r \sim \chi_d} [r^m] \asymp \left( \sqrt{d} \cdot \mathbf{1}\{m \equiv 1 \pmod{2}\} \right) \prod_{j=0}^{\lfloor m/2 \rfloor - 1} (d+2j).$$

**Fact 2.** For any univariate polynomial  $g : \mathbb{R} \rightarrow \mathbb{R}$ , the  $n^{\text{th}}$  forward finite difference of  $g$  at any value  $u$  is given by

$$\Delta^n g(u) := \sum_{i=0}^n \binom{n}{i} (-1)^{n-i} g(u+i).$$

For any polynomial  $g$ , the  $n^{\text{th}}$  forward finite difference  $\Delta^n g(u) \equiv 0$  if  $\deg(g) < n$  and  $\Delta^n g(u)$  is a non-zero constant if  $\deg(g) = n$ . Moreover, for any polynomial given by shifted binomial coefficient of degree  $n$ , with shift  $u_0 \in \mathbb{R}$

$$g_n(u) = \frac{(u+u_0)(u+u_0-1) \cdots (u+u_0-n+1)}{n!} =: \binom{u+u_0}{n},$$

929 the constant value of  $n^{\text{th}}$  forward finite difference is unity, i.e.  $\Delta^n g(u) = 1$ .

930 *Proof of Lemma 3.* We will use the above facts directly along with  $K(d, \ell) = d^\ell$  and  $N, k, \ell$  are  
931 constants (not dependent on  $d$ ) from Proposition 2 throughout the proof. We start by the first part of  
932 the claim

$$\begin{aligned} \mathbb{E}_{r \sim \chi_d} [\beta_{k,\ell}(r)^2] &= \frac{(k!)^2}{(N!)^2 2^{2N}} K(d, \ell) \left( \sum_{n=0}^N \sum_{m=0}^N \frac{\binom{N}{n} \binom{N}{m} (-1)^{2N-n-m} \mathbb{E}[r^{2\ell+2n+2m}]}{\prod_{j=0}^{n+\ell-1} (d+2j) \prod_{j=0}^{m+\ell-1} (d+2j)} \right) \\ &\asymp d^\ell \left( \sum_{n=0}^N \sum_{m=0}^N \frac{\binom{N}{n} \binom{N}{m} (-1)^{2N-n-m} \prod_{j=0}^{\ell+m+n-1} (d+2j)}{\prod_{j=0}^{n+\ell-1} (d+2j) \prod_{j=0}^{m+\ell-1} (d+2j)} \right) \quad (\text{using Fact 1}) \\ &\asymp \frac{d^\ell}{\prod_{j=0}^{N+\ell-1} (d+2j)} \left( \sum_{n=0}^N \sum_{m=0}^N \binom{N}{n} \binom{N}{m} (-1)^{2N-n-m} \prod_{j=m+\ell}^{\ell+m+n-1} (d+2j) \prod_{j=n+\ell}^{N+\ell-1} (d+2j) \right) \\ &\asymp d^{-N} \left( \sum_{n=0}^N \sum_{m=0}^N \binom{N}{n} \binom{N}{m} (-1)^{2N-n-m} \prod_{j=m+\ell}^{\ell+m+n-1} (d+2j) \prod_{j=n+\ell}^{N+\ell-1} (d+2j) \right) \\ &= d^{-\frac{(k-\ell)}{2}} \left( \sum_{n=0}^N \binom{N}{n} (-1)^{N-n} \prod_{j=n+\ell}^{N+\ell-1} (d+2j) \left( \sum_{m=0}^N \binom{N}{m} (-1)^{N-m} \prod_{j=m+\ell}^{\ell+m+n-1} (d+2j) \right) \right) \\ &= d^{-\frac{(k-\ell)}{2}} \left( \sum_{n=0}^N \binom{N}{n} (-1)^{N-n} \prod_{j=n+\ell}^{N+\ell-1} (d+2j) \left( \sum_{m=0}^N \binom{N}{m} (-1)^{N-m} \binom{\frac{d}{2} + m + n - 1}{n} 2^n n! \right) \right) \end{aligned}$$

933 We are now going to show that term inside the parenthesis is some constant independent of  $d$ . Apriori  
934 it may seem that it depends on  $d$ , however, we have a sum of several terms with alternative positive  
935 and negative signs and we will show that all the terms that depend on  $d$  mutually cancel out.

To show this we first observe that  $g(m) = \binom{\frac{d}{2}+m+n-1}{n}$  is a polynomial of degree  $n$  given by binomial coefficient. And, therefore, the  $N^{\text{th}}$  forward finite difference  $\Delta^N g(m) \equiv 0$  for any  $n < N$ , or simply 1 for  $n = N$  using Fact 2. Formally,

$$\sum_{m=0}^N \binom{N}{m} (-1)^{N-m} \binom{\frac{d}{2}+m+n-1}{n} 2^n n! = 2^n n! \cdot \delta_{Nn},$$

936 where the scaling factor of  $2^n n!$  of the polynomial  $g(m)$  can be taken out as the forward finite  
937 difference operator  $\Delta^N$  is linear. We conclude that

$$\begin{aligned} \mathbb{E}[\beta_{k,\ell}(r)^2] &= d^{-\frac{(k-\ell)}{2}} \left( \sum_{n=0}^N \binom{N}{n} (-1)^{N-n} \prod_{j=n+\ell}^{N+\ell-1} (d+2j) \left( \sum_{m=0}^N \binom{N}{m} (-1)^{N-m} \binom{\frac{d}{2}+m+n-1}{n} 2^n n! \right) \right) \\ &= d^{-\frac{(k-\ell)}{2}} \left( \sum_{n=0}^N \binom{N}{n} (-1)^{N-n} \prod_{j=n+\ell}^{N+\ell-1} (d+2j) \cdot \delta_{Nn} \cdot 2^n n! \right) = 2^N N! d^{-\frac{(k-\ell)}{2}} \\ &\asymp d^{-\frac{(k-\ell)}{2}}. \end{aligned}$$

938 We now show the second part that

$$\mathbb{E}[\beta_{k,\ell}(r)]^2 \asymp d^{-(k-\ell)}.$$

939 Let us consider any  $k, \ell$  such that they have the same parity  $k \equiv \ell \pmod{2}$ . We have

$$\begin{aligned} \mathbb{E}[\beta_{k,\ell}(r)] &= \frac{\sqrt{(k!) K(d, \ell)}}{(N!) 2^N} \left( \sum_{i=0}^N \frac{\binom{N}{i} (-1)^{N-i} \mathbb{E}[r^{\ell+2i}]}{\prod_{j=0}^{\ell+i-1} (d+2j)} \right) \\ &\asymp d^{\ell/2} \left( \sqrt{d} \cdot \mathbf{1}\{\ell \equiv 1 \pmod{2}\} \right) \left( \sum_{i=0}^N \binom{N}{i} (-1)^{N-i} \frac{\prod_{j=0}^{\lfloor \ell/2 \rfloor + i - 1} (d+2j)}{\prod_{j=0}^{\ell+i-1} (d+2j)} \right) \quad (\text{using Fact 1}) \\ &\asymp d^{\lceil \ell/2 \rceil} \left( \sum_{i=0}^N \binom{N}{i} (-1)^{N-i} \frac{1}{\prod_{j=\ell/2+i}^{\ell+i-1} (d+2j)} \right) \\ &\asymp d^{\lceil \ell/2 \rceil} \sum_{i=0}^N \binom{N}{i} (-1)^{N-i} \frac{\prod_{j=i}^{N+i-1} (d+2j)}{\prod_{j=i}^{N+i-1} (d+2j) \prod_{j=\lfloor \ell/2 \rfloor + i}^{\ell+i-1} (d+2j)} \\ &\asymp \frac{d^{\lceil \ell/2 \rceil}}{d^{\lceil k/2 \rceil}} \sum_{i=0}^N (1 + o_d(1)) \binom{N}{i} (-1)^{N-i} \prod_{j=i}^{N+i-1} (d+2j) \end{aligned}$$

940 In the last line, we used the fact that  $k \equiv \ell \pmod{2}$  and  $N = (k-\ell)/2$  and thus for every  $0 \leq i \leq N$ ,

$$\prod_{j=i}^{N+i-1} (d+2j) \prod_{j=\ell/2+i}^{i+\ell-1} (d+2j) = d^{N+\ell/2} \prod_{j=i}^{N+i-1} \left( 1 + \frac{2j}{d} \right) \prod_{j=\lfloor \ell/2 \rfloor + i}^{\ell+i-1} \left( 1 + \frac{2j}{d} \right) = (1 + o_d(1)) d^{N+\ell-\lfloor \ell/2 \rfloor},$$

and

$$N + \ell - \lfloor \ell/2 \rfloor = \frac{(k-\ell)}{2} + \ell - \lfloor \ell/2 \rfloor = \frac{k+\ell}{2} - \lfloor \ell/2 \rfloor = \lceil k/2 \rceil.$$

941 Continuing to simplify the original expression

$$\begin{aligned} \mathbb{E}[\beta_{k,\ell}(r)] &\asymp \frac{d^{\lceil \ell/2 \rceil}}{d^{\lceil k/2 \rceil}} \sum_{i=0}^N (1 + o_d(1)) \binom{N}{i} (-1)^{N-i} \prod_{j=i}^{N+i-1} (d+2j) \\ &= \frac{1}{d^{\frac{k-\ell}{2}}} \sum_{i=0}^N \binom{N}{i} (-1)^{N-i} \binom{\frac{d}{2}+i+N-1}{N} 2^N N! \\ &= d^{-\frac{(k-\ell)}{2}} 2^N N! \asymp d^{-\frac{(k-\ell)}{2}}. \end{aligned}$$

942 Here the last line followed from the fact that the polynomial  $g(i) = \binom{\frac{d}{2}+i+N-1}{N}$  is of degree  $N$  given  
943 by a shifted binomial coefficient, and thus, the  $N^{\text{th}}$  forward finite difference of  $g$  is constant, which in  
944 this case is just 1 by Fact 2. We finally conclude the proof by noting that  $\mathbb{E}[\beta_{k,\ell}(r)]^2 \asymp d^{-(k-\ell)}$ .  $\square$

945 **B.3 Proof of Proposition 2**

946 We now return to the deferred proof of Proposition 2. First, we use the explicit expression of  $\text{He}_k$  so  
 947 that  $\|\text{He}_k\|_{L^2} = 1$ .

$$\text{He}_k(r \cdot z) = \text{He}_k(x) = \sqrt{k!} \sum_{m=0}^{\lfloor k/2 \rfloor} \frac{(-1)^m}{m!(k-2m)!} \frac{x^{k-2m}}{2^m} = \sqrt{k!} \sum_{m=0}^{\lfloor k/2 \rfloor} \frac{(-1)^m r^{k-2m}}{m!(k-2m)!} \frac{z^{k-2m}}{2^m}. \quad (39)$$

948 Our goal is to express  $z^{k-2m}$  in terms of  $Q_\ell^{(d)}(z)$  to get the final decomposition. To this end, we use  
 949 the explicit expressions computed with (a different normalization) of Gegenbauer polynomials. In  
 950 particular, using [20, Eq. 18.18.17]

$$z^n = \frac{n!}{2^n} \sum_{l=0}^{\lfloor n/2 \rfloor} \frac{\alpha + n - 2l}{\alpha} \frac{1}{l!(\alpha + 1)_{n-l}} C_{n-2l}^{(\alpha)}(z), \quad (40)$$

951 where  $(b)_a$  is the rising factorial and  $C_\ell^{(\alpha)}(z)$  is an unnormalized Gegenbauer polynomial  $Q_\ell^{(d)}(z)$   
 952 with  $\alpha = (d-2)/2$  satisfying

$$\int_{-1}^{+1} C_\ell^{(\alpha)}(z) C_k^{(\alpha)}(z) (1-z^2)^{\alpha-\frac{1}{2}} dz = \delta_{\ell k} \frac{\pi 2^{1-2\alpha} \Gamma(\ell+2\alpha)}{\ell!(\ell+\alpha)[\Gamma(\alpha)]^2} \quad (41)$$

953 We can express  $C_\ell^{(\alpha)}(z)/\sqrt{K(d,\ell)} = Q_\ell^{(d)}(z)$  where  $K(d,\ell)$  can be computed using

$$1 = \frac{1}{K(d,\ell)} \int_{-1}^{+1} C_\ell^{(\alpha)}(z)^2 \tau_{d,1}(dz) = \frac{1}{K(d,\ell) \text{B}(\alpha+\frac{1}{2}, \frac{1}{2})} \int_{-1}^{+1} C_\ell^{(\alpha)}(z)^2 (1-z^2)^{\alpha-\frac{1}{2}} \tau_{d,1}(dz)$$

954 where  $\text{B}(\cdot, \cdot)$  is the standard Beta function. We can use Eq. (41) to compute

$$K(d,\ell) = \frac{\pi 2^{1-2\alpha} \Gamma(\ell+2\alpha)}{\text{B}(\alpha+\frac{1}{2}, \frac{1}{2}) \ell!(\ell+\alpha)[\Gamma(\alpha)]^2} \quad (42)$$

It is straight-forward to simplify

$$K(d,\ell) = \frac{\alpha \Gamma(\ell+2\alpha)}{\ell!(\alpha+\ell)\Gamma(2\alpha)} = \frac{(d-2)\Gamma(d-2+\ell)}{\ell!(d-2+2\ell)\Gamma(d-2)} = \Theta_d(d^\ell),$$

955 and also substituting  $C_\ell^{(\alpha)}(1)$  from [48], we obtain

$$Q_\ell^{(d)}(1) = \frac{C_\ell^{(\alpha)}(1)}{\sqrt{K(d,\ell)}} = \sqrt{\frac{\ell!(\alpha+\ell)\Gamma(2\alpha)}{\alpha\Gamma(2\alpha+\ell)}} \cdot \frac{\Gamma(2\alpha+\ell)}{\Gamma(2\alpha)\ell!} = \sqrt{\frac{2\ell+d-2}{d-2} \binom{d+\ell-3}{\ell}} = \sqrt{n_{d,\ell}}. \quad (43)$$

956 We are now ready to combine the equations derived and compute the desired decomposition Eq. (36).

957 For any  $M \in \mathbb{N}$ , we let  $\boxed{M} = \{m \in \mathbb{N} : m \leq M \text{ and } m \equiv M \pmod{2}\}$ . Recall from (39)

$$\begin{aligned}
\text{He}_k(r \cdot u) &= \sqrt{k!} \sum_{m=0}^{\lfloor k/2 \rfloor} \frac{(-1)^m r^{k-2m}}{m!(k-2m)!} \frac{u^{k-2m}}{2^m} = \sqrt{k!} \sum_{m \in \boxed{k}} \frac{(-1)^{(k-m)/2} r^m}{m!((k-m)/2)!} \frac{u^m}{2^{(k-m)/2}} \\
&\quad \text{(Change of variables)} \\
&= \sqrt{k!} \sum_{m \in \boxed{k}} \frac{(-1)^{(k-m)/2} r^m}{m!((k-m)/2)!} \frac{m!}{2^m 2^{(k-m)/2}} \sum_{l=0}^{\lfloor m/2 \rfloor} \frac{\alpha + m - 2l}{\alpha} \frac{1}{l!(\alpha+1)_{m-l}} C_{m-2l}^{(\alpha)}(u) \\
&\quad \text{(Using (40))} \\
&= \sqrt{k!} \sum_{m \in \boxed{k}} \frac{(-1)^{(k-m)/2} r^m}{((k-m)/2)!} \frac{1}{2^{(k+m)/2}} \sum_{\ell \in \boxed{m}} \frac{\alpha + \ell}{\alpha} \frac{1}{((m-\ell)/2)!(\alpha+1)_{(m+\ell)/2}} \sqrt{K(d, \ell)} Q_\ell^{(d)}(u) \\
&\quad \text{(Changing } \ell = m - 2l \text{ and } C_\ell^{(\alpha)} = \sqrt{K(d, \ell)} Q_\ell^{(d)}) \\
&= \sqrt{(k!) K(d, \ell)} \sum_{\ell \in \boxed{k}} Q_\ell^{(d)}(u) \frac{\alpha + \ell}{\alpha} \left( \sum_{\substack{m=\ell \\ m \equiv k \pmod{2}}}^k \frac{(-1)^{(k-m)/2} r^m}{((k-m)/2)!} \frac{1}{2^{(k+m)/2} ((m-\ell)/2)!(\alpha+1)_{(m+\ell)/2}} \right) \\
&:= \sum_{\ell=0}^{\infty} Q_\ell^{(d)}(u) \beta_{k, \ell}(r), \text{ where if } \ell \notin \boxed{k} \text{ then } \beta_{k, \ell}(r) = 0.
\end{aligned}$$

958 Otherwise, letting  $N = (k - \ell)/2$

$$\begin{aligned}
\beta_{k, \ell}(r) &= \sqrt{k! K(d, \ell)} \frac{\alpha + \ell}{\alpha} \left( \sum_{\substack{m=\ell \\ m \equiv k \pmod{2}}}^k \frac{(-1)^{(k-m)/2} r^m}{((k-m)/2)! 2^{(k+m)/2} ((m-\ell)/2)!(\alpha+1)_{(m+\ell)/2}} \right) \\
&= \sqrt{k! K(d, \ell)} \frac{\alpha + \ell}{\alpha} \left( \sum_{i=0}^N \frac{(-1)^{N-i} r^{\ell+2i}}{(N-i)! 2^{(k+\ell)/2+2i} (i)!(\alpha+1)_{\ell+2i}} \right) \text{ (changing } m = \ell + 2i) \\
&= \frac{\sqrt{k! K(d, \ell)}}{(N!) 2^N} \frac{\alpha + \ell}{\alpha} \left( \sum_{i=0}^N \binom{N}{i} \frac{(-1)^{N-i} r^{\ell+2i}}{2^{\ell+2i} (\alpha+1)_{\ell+2i}} \right).
\end{aligned}$$

Recall that  $\alpha = (d - 2)/2$  here, and thus

$$2^{\ell+2i} (\alpha + 1)_{\ell+2i} = 2^{\ell+2i} \prod_{j=0}^{\ell+2i-1} (\alpha + 1 + j) = 2^{\ell+2i} \prod_{j=0}^{\ell+2i-1} \left( \frac{d-2}{2} + 1 + j \right) = \prod_{j=0}^{\ell+2i-1} (d + 2j).$$

959 Thus, for  $\ell \equiv k \pmod{2}$

$$\beta_{k, \ell}(r) = \frac{\sqrt{k! K(d, \ell)}}{(N!) 2^N} \frac{d + 2\ell - 2}{d - 2} \left( \sum_{i=0}^N \binom{N}{i} \frac{(-1)^{N-i} r^{\ell+2i}}{\prod_{j=0}^{\ell+2i-1} (d + 2j)} \right).$$

960 The lemma follows by redefining  $K(d, \ell)$  with  $K(d, \ell)(d + 2\ell - 2)^2 / (d - 2)^2 = \Theta_d(d^\ell)$ .

## C Statistical Query (SQ) and Low-Degree Polynomial (LDP) lower bounds

In this appendix, we briefly review the statistical query (SQ) and low-degree polynomial (LDP) frameworks and present the proof of Theorem 1. In particular, we provide an interpretation of our lower bounds in terms of subproblems with queries restricted to the harmonic subspace  $V_{d,\ell}$ .

### C.1 Statistical Query lower bounds

The Statistical Query (SQ) framework, introduced by Kearns [31], models algorithms that interact with data only through expectations of query functions, rather than direct access to samples. The complexity of these algorithms is measured up to some worst-case tolerance on these expectations. While based on worst-case error rather than sampling error encountered in practice, the SQ framework has proven remarkably effective in analyzing the computational complexity of statistical problems, often yielding accurate predictions for algorithmic feasibility. We refer to [10, 39] for additional background.

Below, it will be useful to present a variant of SQ algorithms, called *query-restricted statistical query algorithms*, introduced in [28]. In this model, queries are restricted to a set  $\mathcal{Q} \subseteq \mathbb{R}^{\mathcal{Y} \times \mathbb{R}^d}$  of measurable functions  $\mathcal{Y} \times \mathbb{R}^d \rightarrow \mathbb{R}$ . We denote  $\mathcal{Q}\text{-SQ}(q, \tau)$  this class of algorithms, with number of queries  $q$  and tolerance  $\tau > 0$ . We will mainly consider the standard case of *unrestricted queries*, denoted  $\text{SQ}(q, \tau)$ , where  $\mathcal{Q}$  contains all measurable functions. In Appendix A.3 we discuss the case of *correlation statistical queries* (CSQ).

Our lower bounds hold for the detection problem (hypothesis testing) of distinguishing between

$$\{\mathbb{P}_{\nu_d, \mathbf{w}} : \mathbf{w} \in \mathbb{S}^{d-1}\} \quad \text{v.s.} \quad \{\mathbb{P}_{\nu_d, 0}\}. \quad (44)$$

Below, we describe  $\mathcal{Q}\text{-SQ}$  algorithms in this context.

**$\mathcal{Q}$ -restricted SQ algorithm.** For a number of queries  $q$  and tolerance  $\tau > 0$ , a  $\mathcal{Q}$ -restricted SQ algorithm  $\mathcal{A} \in \mathcal{Q}\text{-SQ}(q, \tau)$  for detecting SIMs takes an input distribution  $\mathbb{P}$  from (44) and operates in  $q$  rounds where at each round  $t \in \{1, \dots, q\}$ , it issues a query  $\phi_t \in \mathcal{Q}$ , and receives a response  $v_t$  such that

$$|v_t - \mathbb{E}_{\mathbb{P}}[\phi_t(y, \mathbf{x})]| \leq \tau \sqrt{\text{Var}_{\mathbb{P}_0}(\phi_t)}, \quad (45)$$

where we set  $\mathbb{P}_0$  to be the null distribution (that is,  $\mathbb{P}_{\nu_d, 0}$  here). The query  $\phi_t$  can depend on the past responses  $v_1, \dots, v_{t-1}$ . After issuing  $q$  queries, the learner outputs  $\mathcal{A}(\mathbb{P}) \in \{0, 1\}$ . We say that  $\mathcal{A}$  succeeds in distinguishing  $\mathbb{P}_{\nu_d, \mathbf{w}}$  and  $\mathbb{P}_{\nu_d, 0}$ , if  $\mathcal{A}(\mathbb{P}_{\nu_d, \mathbf{w}}) = 1$  for all  $\mathbf{w} \in \mathbb{S}^{d-1}$ , and  $\mathcal{A}(\mathbb{P}_{\nu_d, 0}) = 0$ .

**Remark C.1.** The variance scaling on the right-hand side in (45) is non-standard in the SQ literature. It is introduced here as a convenient way to normalize queries, which is necessary for  $\tau$  to be meaningful. We note that other normalizations are possible and refer to [28, Remark 3.1] for a discussion.

**General lower-bound.** The following proposition is a simple, standard lower bound on the query complexity based on the second moment method (e.g., see [28]):

**Proposition 3** (General  $\mathcal{Q}$ -restricted SQ lower bound). *Fix  $\nu_d \in \mathcal{L}_d$ . If an algorithm  $\mathcal{A} \in \mathcal{Q}\text{-SQ}(q, \tau)$  succeeds at distinguishing  $\mathbb{P}_{\nu_d, \mathbf{w}}$  from  $\mathbb{P}_{\nu_d, 0}$ , then we must have*

$$q/\tau^2 \geq \left[ \sup_{\phi \in \mathcal{Q}} \frac{\text{Var}_{\mathbf{w} \sim \tau_d} \{\mathbb{E}_{\mathbb{P}_{\nu_d, \mathbf{w}}} \phi\}}{\text{Var}_{\mathbb{P}_{\nu_d, 0}} \{\phi\}} \right]^{-1}. \quad (46)$$

*Proof.* Consider  $\mathcal{A} \in \mathcal{Q}\text{-SQ}(q, \tau)$  and denote  $\phi_1, \dots, \phi_q \in \mathcal{Q}$  the sequence of queries issued by  $\mathcal{A}$  when it receives responses  $v_t = \mathbb{E}_{\mathbb{P}_{\nu_d, 0}}[\phi_t]$ ,  $t \in [q]$ . Here the responses are fixed and deterministic, and the queries  $\{\phi_t\}_{t \in [q]}$  do not depend on the source distribution  $\mathbb{P}_{\nu_d, \mathbf{w}}$ , and in particular  $\mathbf{w}$ . By union bound and Markov's inequality,

$$\begin{aligned} \mathbb{P}_{\mathbf{w} \sim \tau_d} \left( \exists t \in [q], |\mathbb{E}_{\mathbb{P}_{\nu_d, \mathbf{w}}}[\phi_t] - v_t| > \tau \sqrt{\text{Var}_{\mathbb{P}_{\nu_d, 0}}[\phi_t]} \right) &\leq \frac{q}{\tau^2} \cdot \sup_{t \in [q]} \frac{\text{Var}_{\mathbf{w} \sim \tau_d} \{\mathbb{E}_{\mathbb{P}_{\nu_d, \mathbf{w}}} \phi_t\}}{\text{Var}_{\mathbb{P}_{\nu_d, 0}} \{\phi_t\}} \\ &\leq \frac{q}{\tau^2} \cdot \sup_{\phi \in \mathcal{Q}} \frac{\text{Var}_{\mathbf{w} \sim \tau_d} \{\mathbb{E}_{\mathbb{P}_{\nu_d, \mathbf{w}}} \phi\}}{\text{Var}_{\mathbb{P}_{\nu_d, 0}} \{\phi\}}. \end{aligned}$$

1000 This implies that the  $v_t = \mathbb{E}_{\mathbb{P}_{\nu_d,0}}[\phi_t]$  responses are compatible for all  $q$  queries with positive  
 1001 probability over  $\mathbf{w} \sim \tau_d$  whenever inequality (46) is not satisfied, and  $\mathcal{A}$  fails the detection task in  
 1002 that case. This concludes the proof.  $\square$

1003 The query complexity bound in Theorem 1.(i) follows from Proposition 3 with unrestricted queries  
 1004  $\mathcal{Q}_{\text{SQ}}$  and the following identity:

1005 **Lemma 4.** *For  $\nu_d \in \mathcal{L}_d$  and  $\mathcal{Q}_{\text{SQ}}$  the class of unrestricted queries (all measurable functions), we*  
 1006 *have the identity*

$$\sup_{\phi \in \mathcal{Q}_{\text{SQ}}} \frac{\text{Var}_{\mathbf{w} \sim \tau_d} \{\mathbb{E}_{\mathbb{P}_{\nu_d, \mathbf{w}}} \phi\}}{\text{Var}_{\mathbb{P}_{\nu_d, 0}} \{\phi\}} = \sup_{\ell \geq 1} \frac{\|\xi_{d, \ell}\|_{L^2}^2}{n_{d, \ell}} =: [\mathbf{Q}_*(\nu_d)]^{-1}. \quad (47)$$

1007 We defer the proof of this lemma below to Section C.1.1. The identity (47) shows that the lower bound  
 1008 effectively decouples across the different harmonic subspaces. Below, we provide an interpretation of  
 1009 this result: if we restrict the queries  $\mathcal{Q}$  to be in  $V_{d, \ell}$ , then the SQ lower bound becomes  $n_{d, \ell} / \|\xi_{d, \ell}\|_{L^2}^2$ .  
 1010 Specifically, for each  $\ell \geq 1$ , define  $\mathcal{Q}_{\text{SQ}, \ell}$  to be the set of all queries  $\phi(y, \mathbf{x})$  than can be written as

$$\phi(y, \mathbf{x}) = \sum_{s \in [n_{d, \ell}]} g_\ell(y, r) Y_{\ell s}(\mathbf{z}), \quad (48)$$

1011 where  $\{Y_{\ell s}\}_{s \in [n_{d, \ell}]}$  is a basis of  $V_{d, \ell}$ . Then by Proposition 3 and the proof of Lemma 4, we have:

1012 **Corollary 3.** *Fix  $\nu_d \in \mathcal{L}_d$  and  $\ell \geq 1$ . If an algorithm  $\mathcal{A} \in \mathcal{Q}_{\text{SQ}, \ell}\text{-SQ}(q, \tau)$  succeeds at distinguishing*  
 1013  *$\mathbb{P}_{\nu_d, \mathbf{w}}$  from  $\mathbb{P}_{\nu_d, 0}$ , then we must have*

$$q/\tau^2 \geq \left[ \sup_{\phi \in \mathcal{Q}_{\text{SQ}, \ell}} \frac{\text{Var}_{\mathbf{w} \sim \tau_d} \{\mathbb{E}_{\mathbb{P}_{\nu_d, \mathbf{w}}} \phi\}}{\text{Var}_{\mathbb{P}_{\nu_d, 0}} \{\phi\}} \right]^{-1} = \frac{n_{d, \ell}}{\|\xi_{d, \ell}\|_{L^2}^2}. \quad (49)$$

1014 For each  $\ell \geq 1$ , we show algorithms with queries restricted to  $V_{d, \ell}$  as in (48) that matches this  
 1015 lower bound. Thus, effectively, the problem decouples into subproblems, one for each  $V_{d, \ell}$ : on each  
 1016 harmonic subspace, we have a matching upper and lower bound on the query complexity, and the  
 1017 optimal algorithm is obtained by choosing the optimal degree  $\ell$  that attains the maximum in (47).

### 1018 C.1.1 Proof of Lemma 4

1019 For clarity, we drop the subscript  $\nu_d$  below and denote  $\mathbb{P}_{\mathbf{w}} := \mathbb{P}_{\nu_d, \mathbf{w}}$  and  $\mathbb{P}_0 := \mathbb{P}_{\nu_d, 0}$ . Note that a  
 1020 property of the null distribution is that

$$\mathbb{E}_{\mathbf{w}} [\mathbb{E}_{\mathbb{P}_{\mathbf{w}}} [\phi]] = \mathbb{E}_{\mathbb{P}_0} [\phi],$$

1021 that is,  $\mathbb{P}_0$  is the marginal distribution of  $(y, \mathbf{x})$  under the uniform prior  $\mathbf{w} \sim \tau_d$ . Thus,

$$\text{Var}_{\mathbf{w}} \{\mathbb{E}_{\mathbb{P}_{\mathbf{w}}} \phi\} = \mathbb{E}_{\mathbf{w}} [|\Delta_\phi(\mathbf{w})|^2], \quad \text{where} \quad \Delta_\phi(\mathbf{w}) = \mathbb{E}_{\mathbb{P}_{\mathbf{w}}} [\phi] - \mathbb{E}_{\mathbb{P}_0} [\phi].$$

1022 Let's introduce the Radon-Nikodym derivative and write

$$\Delta_\phi(\mathbf{w}) = \mathbb{E}_{\mathbb{P}_0} \left[ \left( \frac{d\mathbb{P}_{\mathbf{w}}}{d\mathbb{P}_0}(y_0, \mathbf{z}, r) - 1 \right) \phi(y_0, \mathbf{z}, r) \right].$$

1023 Recall that the likelihood ratio decomposes into Gegenbauer polynomials as (equality in  $L^2(\mathbb{P}_0)$ )

$$\frac{d\mathbb{P}_{\mathbf{w}}}{d\mathbb{P}_0}(y_0, \mathbf{z}, r) - 1 = \sum_{\ell=1}^{\infty} \xi_{d, \ell}(y_0, r) Q_\ell(\langle \mathbf{w}, \mathbf{z} \rangle), \quad \xi_{d, \ell}(y_0, r) = \mathbb{E}_{\nu_d} [Q_\ell(Z) | Y = y_0, R = r].$$

1024 Similarly, we can expand  $\phi \in L^2(\mathbb{P}_0)$  as

$$\phi(y_0, \mathbf{z}, r) = \sum_{\ell=0}^{\infty} \sum_{s \in [n_{d, \ell}]} \alpha_{\ell s}(y_0, r) Y_{\ell s}(\mathbf{z}),$$

1025 where  $\{Y_{\ell s}\}_{\ell \geq 0, s \in [n_{d,\ell}]}$  is an orthonormal basis of spherical harmonics in  $L^2(\mathbb{S}^{d-1})$ . Using the  
 1026 identity  $Q_\ell(\langle \mathbf{w}, \mathbf{z} \rangle) = n_{d,\ell}^{-1/2} \sum_{s \in [n_{d,\ell}]} Y_{\ell s}(\mathbf{w}) Y_{\ell s}(\mathbf{z})$ , we obtain the decomposition

$$\Delta_\phi(\mathbf{w}) = \sum_{\ell=1}^{\infty} \sum_{s \in [n_{d,\ell}]} Y_{\ell s}(\mathbf{w}) \frac{\mathbb{E}_{\mathbb{P}_0}[\xi_{d,\ell}(y_0, r) \alpha_{\ell s}(y_0, r)]}{\sqrt{n_{d,\ell}}},$$

1027 and thus,

$$\mathbb{E}_{\mathbf{w}}[|\Delta_\phi(\mathbf{w})|^2] = \sum_{\ell=1}^{\infty} \sum_{s \in [n_{d,\ell}]} \frac{\mathbb{E}_{\mathbb{P}_0}[\xi_{d,\ell}(y_0, r) \alpha_{\ell s}(y_0, r)]^2}{n_{d,\ell}}.$$

1028 Denote  $\mathbf{P}_\ell \phi = \sum_{s \in [n_{d,\ell}]} \alpha_{\ell s} Y_{\ell s}$  the projection on the degree- $\ell$  harmonics. We can decompose the  
 1029 supremum over  $\phi \in \mathcal{Q}_{\text{SQ}}$  as

$$\begin{aligned} & \sup_{\phi \in \mathcal{Q}_{\text{SQ}}} \frac{\mathbb{E}_{\mathbf{w}}[|\Delta_\phi(\mathbf{w})|^2]}{\text{Var}_{\mathbb{P}_0}(\phi)} \\ &= \sup_{\phi \in \mathcal{Q}_{\text{SQ}}} \frac{1}{\sum_{\ell \geq 1} \|\mathbf{P}_\ell \phi\|_{L^2}^2} \sum_{\ell \geq 1} \frac{\|\mathbf{P}_\ell \phi\|_{L^2}^2}{n_{d,\ell}} \left[ \sum_{s \in [n_{d,\ell}]} \frac{\mathbb{E}_{\mathbb{P}_0}[\xi_{d,\ell}(y_0, r) \alpha_{\ell s}(y_0, r)]^2}{\|\mathbf{P}_\ell \phi\|_{L^2}^2} \right] \\ &= \sup_{\phi \in \mathcal{Q}_{\text{SQ}}} \frac{1}{\sum_{\ell \geq 1} \|\mathbf{P}_\ell \phi\|_{L^2}^2} \sum_{\ell \geq 1} \frac{\|\mathbf{P}_\ell \phi\|_{L^2}^2}{n_{d,\ell}} \left[ \sup_{\psi \in L^2(\nu_{d,Y,R})} \frac{\langle \xi_{d,\ell}, \psi \rangle_{L^2}^2}{\|\psi\|_{L^2}^2} \right] \\ &= \sup_{\phi \in \mathcal{Q}_{\text{SQ}}} \frac{\sum_{\ell \geq 1} \|\mathbf{P}_\ell \phi\|_{L^2}^2 \frac{\|\xi_{d,\ell}\|_{L^2}^2}{n_{d,\ell}}}{\sum_{\ell \geq 1} \|\mathbf{P}_\ell \phi\|_{L^2}^2} = \sup_{\ell \geq 1} \frac{\|\xi_{d,\ell}\|_{L^2}^2}{n_{d,\ell}}, \end{aligned}$$

1030 which concludes the proof of this lemma.

## 1031 C.2 Low-Degree Polynomial lower bounds

1032 We now consider sample complexity lower bounds within the Low-Degree Polynomial (LDP)  
 1033 framework—another powerful tool for studying computational hardness in statistical inference  
 1034 problems. We refer to [24, 32, 40] for background.

1035 Below we follow the presentation of [15]. The planted distribution with  $m$  samples is generated by first  
 1036 drawing  $\mathbf{w} \sim \tau_d$  (uniformly at random on the sphere), then sampling  $m$  points  $(y_i, \mathbf{x}_i) \sim_{iid} \mathbb{P}_{\nu_d, \mathbf{w}_*}$ .  
 1037 The null distribution corresponds to  $(y_i, \mathbf{x}_i) \sim_{iid} \mathbb{P}_{\nu_d, 0}$ . The likelihood ratio in this model is given by

$$\mathcal{R}((y_i, \mathbf{x}_i)_{i \in [m]}) = \mathbb{E}_{\mathbf{w}} \left[ \prod_{i \in [m]} \frac{d\mathbb{P}_{\nu_d, \mathbf{w}}}{d\mathbb{P}_{\nu_d, 0}}(y_i, \mathbf{x}_i) \right].$$

1038 We consider the orthogonal projection  $\mathcal{P}_{\leq D}$  (in  $L^2(\mathbb{P}_{\nu_d, 0}^{\otimes m})$ ) onto degree at most  $D$  polynomial in  $\mathbf{z}_i$ ,  
 1039 that is, we allow arbitrary degree on the scalars  $(y_i, r_i)$ . We denote

$$\mathcal{R}_{\leq D}((y_i, \mathbf{x}_i)_{i \in [m]}) = \mathcal{P}_{\leq D} \mathcal{R}((y_i, \mathbf{x}_i)_{i \in [m]}). \quad (50)$$

1040 Informally, the low-degree conjecture [24] states that for  $D = \omega_d(\log d)$ :

- 1041 • *Weak detection hardness:* If  $\|\mathcal{R}_{\leq D}\|_{L^2}^2 = 1 + o_d(1)$ , then no polynomial time algorithm  
 1042 can distinguish between  $\mathbb{E}_{\mathbf{w}}[\mathbb{P}_{\nu_d, \mathbf{w}}^{\otimes m}]$  and  $\mathbb{P}_{\nu_d, 0}^{\otimes m}$  with non-vanishing probability.
- 1043 • *Strong detection hardness:* If  $\|\mathcal{R}_{\leq D}\|_{L^2}^2 = O_d(1)$ , then polynomial time algorithm can only  
 1044 succeed with constant probability.

1045 Below, we state our results for weak and strong detection for a sequence of spherical SIMs  $\{\nu_d\}_{d \geq 1}$   
 1046 with  $\nu_d \in \mathcal{L}_d$ . Recall that we defined:

$$\mathbf{M}_*(\nu_d) = \inf_{\ell \geq 1} \frac{\sqrt{n_{d,\ell}}}{\|\xi_{d,\ell}\|_{L^2}^2}$$

1047 Without loss of generality, we will assume that  $\mathbf{M}_*(\nu_d) = O_d(\text{poly}(d))$ —that is, the model can be  
 1048 solved in polynomial time—as stated in the following assumption:

1049 **Assumption 3.** *There exists  $p \in \mathbb{N}$  such that the sequence  $\{\nu_d\}_{d \geq 1}$  satisfies  $M_\star(\nu_d) = O_d(d^{p/2})$ .*

1050 We can now state our bound on the low-degree projection of the likelihood ratio in this problem.

1051 **Theorem 3.** *Let  $\{\nu_d\}_{d \geq 1}$  be a sequence of spherical SIMs  $\nu_d \in \mathfrak{L}_d$  satisfying Assumption 3 for some*  
 1052 *integer  $p \in \mathbb{N}$ . Consider the detection task with  $m$  samples as defined above. There exists a constant*  
 1053  *$c > 0$  that only depends on the constants in Assumption 3 such that if  $D \leq cd^{2/(p+4)}$ , then*

$$\|\mathcal{R}_{\leq D}\|_{L^2}^2 - 1 \leq \sum_{s=1}^D \left( m \frac{D^{p/2-1}}{M_\star(\nu_d)} [e(p+1)] \right)^s. \quad (51)$$

1054 *In particular,*

1055 (i) (Weak detection.) *If  $m = o_d\left(\frac{M_\star(\nu_d)}{D^{p/2-1}}\right)$ , then  $\|\mathcal{R}_{\leq D}\|_{L^2}^2 = 1 + o_d(1)$ .*

1056 (ii) (Strong detection.) *If  $m = O_d\left(\frac{M_\star(\nu_d)}{D^{p/2-1}}\right)$ , then  $\|\mathcal{R}_{\leq D}\|_{L^2}^2 = O_d(1)$ .*

1057 The proof of this theorem can be found in Section C.2.1 below.

1058 Combining this theorem with the low-degree conjecture stated above, we conclude that no-polynomial  
 1059 time algorithm can detect (and thus, estimate) the spherical single-index model  $\mathbb{P}_{\nu_d, \mathbf{w}}$  unless

$$m \gtrsim M_\star(\nu_d).$$

1060 We further remark that we recover the tight threshold  $M_\star(\nu_d)/D^{p/2-1}$  from [15]. Indeed, consider the  
 1061 case of Gaussian SIM with information exponent  $k_\star$ . We can set  $p = k_\star$ , and our bound recover the  
 1062 (conjectured) optimal computational-statistical trade-off  $d^{k_\star/2}/D^{k_\star/2-1}$  from [15], which matches  
 1063 the optimal known trade-off in tensor PCA [47].

1064 **Decoupling across harmonic subspaces.** Again, we provide an interpretation of this lower bound  
 1065 as the optimal lower bound among subproblems indexed by  $\ell \geq 1$ . For each  $\ell \geq 1$ , we consider  
 1066 the task of detecting single-index models only using degree- $\ell$  spherical harmonics. We consider  
 1067 only using polynomials that are product of degree- $\ell$  spherical harmonics in  $\mathbf{z}_i$ . Denote  $\mathcal{P}_{\leq D, \ell}$  the  
 1068 projection onto this subspace, that is

$$\mathcal{P}_{\leq D, \ell} \mathcal{R}((y_i, \mathbf{x}_i)_{i \in [m]}) = \sum_{S \subset [m], |S| \leq \lfloor D/\ell \rfloor} \mathbb{E}_{\mathbf{w}} \left[ \prod_{i \in S} \xi_{d, \ell}(y_i, r_i) Q_\ell(\langle \mathbf{w}, \mathbf{z}_i \rangle) \right].$$

1069 Then we have the following upper bound on the norm of this projected likelihood ratio.

1070 **Corollary 4.** *Let  $\{\nu_d\}_{d \geq 1}$  be a sequence of spherical SIMs  $\nu_d \in \mathfrak{L}_d$  satisfying Assumption 3 for*  
 1071 *some integer  $p \in \mathbb{N}$ . Consider the detection task with  $m$  samples as defined above and fix  $\ell_\star \in \mathbb{N}$ .*  
 1072 *Then for all  $D \geq 1$ , we have*

$$\|\mathcal{R}_{\leq D}\|_{L^2}^2 - 1 \leq \sum_{s=1}^{\lfloor D/\ell_\star \rfloor} \left( m \frac{eD^{\ell_\star/2-1} \|\xi_{d, \ell_\star}\|_{L^2}^2}{\sqrt{n_{d, \ell_\star}}} \right)^s. \quad (52)$$

1073 By analogy with the low-degree conjecture, we expect that no polynomial-time algorithm only using  
 1074 degree- $\ell$  spherical harmonics will succeed at the detection task, unless

$$m \gtrsim \frac{\sqrt{n_{d, \ell_\star}}}{\|\xi_{d, \ell_\star}\|_{L^2}^2}. \quad (53)$$

1075 It would be interesting to make this subspace-restricted low-degree polynomial statement more formal,  
 1076 and we leave it to future work. Our harmonic tensor unfolding estimator matches this heuristic sample  
 1077 lower bound (53) for each  $\ell_\star \geq 3$ .

### 1078 C.2.1 Proof of Theorem 3

1079 Recalling the expansion of the likelihood function into Gegenbauer polynomials, we can write

$$\begin{aligned}\mathcal{R}_{\leq D}((y_i, r_i, \mathbf{z}_i)_{i \in [m]}) &= \mathcal{P}_{\leq D} \mathbb{E}_{\mathbf{w}} \left[ \prod_{i \in [m]} \frac{d\mathbb{P}_{\nu_d, \mathbf{w}}}{d\mathbb{P}_{\nu_d, 0}}(y_i, r_i, \mathbf{z}_i) \right] \\ &= \sum_{\ell_1 + \dots + \ell_m \leq D} \mathbb{E}_{\mathbf{w}} \left[ \prod_{i \in [m]} \xi_{d, \ell_i}(y_i, r_i) Q_{\ell_i}(\langle \mathbf{w}, \mathbf{z}_i \rangle) \right].\end{aligned}$$

1080 The norm of this projection with respect to  $\mathbb{P}_0^{\otimes m}$  is then given by

$$\|\mathcal{R}_{\leq D}\|_{L^2}^2 = \sum_{\ell_1 + \dots + \ell_m \leq D} \mathbb{E}_{\mathbf{w}, \mathbf{w}'} \left[ \prod_{i \in [m]} \frac{\|\xi_{d, \ell_i}\|_{L^2}^2}{\sqrt{n_{d, \ell_i}}} Q_{\ell_i}(\langle \mathbf{w}, \mathbf{w}' \rangle) \right], \quad (54)$$

1081 where we used

$$\mathbb{E}_{\mathbf{z}}[Q_{\ell}(\langle \mathbf{w}, \mathbf{z} \rangle) Q_k(\langle \mathbf{z}, \mathbf{w}' \rangle)] = \frac{\delta_{\ell=k'}}{\sqrt{n_{d, \ell}}} Q_{\ell}(\langle \mathbf{w}, \mathbf{w}' \rangle).$$

1082 Let's separate the zero degrees from the non-zero degrees in (54):

$$\|\mathcal{R}_{\leq D}\|_{L^2}^2 - 1 = \sum_{s=1}^D \binom{m}{s} \sum_{\substack{1 \leq \ell_1, \dots, \ell_s \leq D \\ \ell_1 + \dots + \ell_s \leq D}} \mathbb{E}_{\mathbf{w}, \mathbf{w}'} \left[ \prod_{i \in [s]} \frac{\|\xi_{d, \ell_i}\|_{L^2}^2}{\sqrt{n_{d, \ell_i}}} Q_{\ell_i}(\langle \mathbf{w}, \mathbf{w}' \rangle) \right].$$

1083 To upper bound the expectation, we will not be careful and simply use Hölder's inequality and the  
1084 hypercontractivity (Lemma 25) of Gegenbauer polynomials,

$$\mathbb{E}_{\mathbf{w}, \mathbf{w}'} \left[ \prod_{i \in [s]} Q_{\ell_i}(\langle \mathbf{w}, \mathbf{w}' \rangle) \right] \leq \prod_{i \in [s]} \|Q_{\ell_i}\|_{L^s} \leq \prod_{i \in [s]} s^{\ell_i/2}.$$

1085 We obtain the upper bound

$$\|\mathcal{R}_{\leq D}\|_{L^2}^2 - 1 \leq \sum_{s=1}^D \binom{m}{s} \sum_{\substack{1 \leq \ell_1, \dots, \ell_s \leq D \\ \ell_1 + \dots + \ell_s \leq D}} \prod_{i \in [s]} s^{\ell_i/2} \frac{\|\xi_{d, \ell_i}\|_{L^2}^2}{\sqrt{n_{d, \ell_i}}} \leq \sum_{s=1}^D \binom{m}{s} \rho(s, D)^s,$$

1086 where

$$\rho(s, D) = \sum_{\ell=1}^D s^{\ell/2} \frac{\|\xi_{d, \ell}\|_{L^2}^2}{\sqrt{n_{d, \ell}}}.$$

1087 Let's upper bound  $\rho(s, D)$ . By definition  $\|\xi_{d, \ell}\|_{L^2}^2/n_{d, \ell} \leq 1/M_{\star}$  for all  $\ell \geq 1$  (where we denote  
1088  $M_{\star} = M_{\star}(\nu_d)$  for simplicity). Furthermore, by Assumption 3, we have  $M_{\star} \leq Cd^{p/2}$ . Using  
1089  $\|\xi_{d, \ell}\|_{L^2} \leq 1$ , we deduce a second upper bound

$$\frac{\|\xi_{d, \ell}\|_{L^2}^2}{\sqrt{n_{d, \ell}}} \leq C \frac{d^{p/2}}{M_{\star} \sqrt{n_{d, \ell}}}.$$

1090 Separating  $\ell \leq p$  and  $\ell > p$ , we get

$$\rho(s, D) \leq \sum_{\ell=1}^p \frac{s^{\ell/2}}{M_{\star}} + C \sum_{\ell=p+1}^D \frac{s^{\ell/2} d^{p/2}}{M_{\star} \sqrt{n_{d, \ell}}} \leq \frac{s^{p/2}}{M_{\star}} \left[ p + C \sum_{\ell=p+1}^D \frac{D^{(\ell-p)/2} d^{p/2}}{\sqrt{n_{d, \ell}}} \right].$$

1091 Using that for  $\ell \leq D \leq \sqrt{d}$ , we have  $n_{d, \ell} \geq c \binom{d}{\ell} \geq c(d/\ell)^{\ell}$  for some constant  $c > 0$ , the sum  
1092 simplifies to

$$\sum_{\ell=p+1}^D \frac{D^{(\ell-p)/2} d^{p/2}}{\sqrt{n_{d, \ell}}} \leq C' \sum_{\ell=p+1}^d \frac{D^{(\ell-p)/2} d^{p/2} \ell^{\ell/2}}{d^{\ell/2}} \leq C' D^{p/2} \sum_{\ell=1}^{\infty} \left( \frac{D^2}{d} \right)^{\ell} \leq C'' \frac{D^{p/2+2}}{d}.$$

1093 Assuming that  $D \leq d^{2/(p+4)}/\tilde{C}$ , we deduce that

$$\rho(s, D) \leq \frac{s^{p/2}}{M_*}(p+1).$$

1094 Thus, we obtain

$$\|\mathcal{R}_{\leq D}\|_{L^2}^2 - 1 \leq \sum_{s=1}^D \binom{m}{s} \frac{s^{sp/2}}{M_*^s} (p+1)^s \leq \sum_{s=1}^D \left( \frac{mD^{p/2-1}}{M_*} [e(p+1)] \right)^s,$$

1095 which concludes the proof of Theorem 3.

1096 **Restricted projection.** Consider the likelihood ratio projected on degree- $\ell_*$  spherical harmonics.  
 1097 The proof is particularly simple in this case:

$$\begin{aligned} \|\mathcal{R}_{\leq D, \ell_*}\|_{L^2}^2 - 1 &= \sum_{s=1}^{\lfloor D/\ell_* \rfloor} \binom{m}{s} \left( \frac{\|\xi_{d, \ell_*}\|_{L^2}^2}{\sqrt{n_{d, \ell_*}}} \right)^s \mathbb{E}_{\mathbf{w}, \mathbf{w}'} [Q_{\ell_*}(\langle \mathbf{w}, \mathbf{w}' \rangle)]^s \\ &\leq \sum_{s=1}^{\lfloor D/\ell_* \rfloor} \left( \frac{em}{s} \right)^s \left( \frac{\|\xi_{d, \ell_*}\|_{L^2}^2}{\sqrt{n_{d, \ell_*}}} \right)^s s^{s\ell_*/2} \\ &\leq \sum_{s=1}^{\lfloor D/\ell_* \rfloor} \left( m \frac{eD^{\ell_*/2-1} \|\xi_{d, \ell_*}\|_{L^2}^2}{\sqrt{n_{d, \ell_*}}} \right)^s. \end{aligned}$$

## 1098 D Spectral estimators

1099 In this section, we provide the spectral algorithm for Theorem 2 (part 1).

1100 **Requirement 1.** We are going to implement our algorithms on  $\mathcal{T}_\ell$  satisfying the following criteria.

- 1101 1.  $\|\mathcal{T}_\ell\|_2 = 1$  and  $\mathbb{E}_{(y, r, z) \sim \nu_d} [\mathcal{T}_\ell(y, r) Q_\ell(z)] := \beta_{d, \ell} > 0$  (w.l.o.g.).  
 1102 2. There exists  $\kappa_\ell > 1$ ,  $k \in \mathbb{N}$ , such that, for any  $p \geq 3$ , we have  $\|\mathcal{T}_\ell\|_p \leq \kappa_\ell p^{k/2}$

1103 Note that a transformation  $\mathcal{T}_\ell$  satisfying Assumption 2 is a special case of this requirement with  $k = 0$   
 1104 and  $\beta_{d, \ell} \geq \|\xi_{d, \ell}\|_{L^2}/\kappa_\ell$ , and thus the theorem will follow by invoking the guarantee for this more  
 1105 general  $\mathcal{T}_\ell$  satisfying Requirement 1. We first specify the spectral algorithm.

---

**Algorithm 2:** A spectral algorithm on the frequency  $\ell = 1$  and  $\ell = 2$ .

---

**Input :** An example set  $S = \{(\mathbf{x}_i, y_i) : i \in [m]\} \sim_{iid} \mathbb{P}_{\mathbf{w}_*}$ , the frequency  $\ell \in \{1, 2\}$ , and a transformation  $\mathcal{T}_\ell$ .

**Output :** An estimator  $\hat{\mathbf{w}} \in \mathbb{R}^d$ .

- 1 Decompose  $\mathbf{x}_i = (r_i, \mathbf{z}_i)$ .
  - 2 **if**  $\ell = 1$  **then**
    - 3     Let  $\hat{\mathbf{v}}_m := \frac{1}{m} \sum_{i \in [m]} \mathcal{T}_\ell(y_i, r_i) \sqrt{d} \mathbf{z}_i$ .
    - 4      $\hat{\mathbf{w}} = \frac{\hat{\mathbf{v}}_m}{\|\hat{\mathbf{v}}_m\|_2}$
  - 5 **end**
  - 6 **if**  $\ell = 2$  **then**
    - 7     Let  $\mathbf{M}_m = \frac{1}{m} \sum_{i=1}^m \mathcal{T}_\ell(y_i, r_i) (d\mathbf{z}_i \mathbf{z}_i^\top - \mathbf{I}_d)$ .
    - 8     Let  $\hat{\mathbf{w}} = \mathbf{v}_1(\mathbf{M}_m)$  be the eigenvector associated with the highest magnitude eigenvalue.
  - 9 **end**
  - 10 Return  $\hat{\mathbf{w}}$ .
- 

### 1107 D.1 Analysis of $\ell = 2$

1108 Let  $\mathbf{M}^* := \mathbb{E}[\mathbf{M}_m]$  and  $(\lambda_i^*, \mathbf{v}_i^*)_{i \in [d]}$  be eigenpairs of  $\mathbf{w}^*$  such that  $|\lambda_1^*| \geq \dots \geq |\lambda_d^*|$ . We first  
 1109 show that the top eigenvector  $\mathbf{v}_1^* = \mathbf{w}_*$  with  $\lambda_1^* = (1 + o_d(1))\beta_{d, 2}$  and the other eigenvalues are of  
 1110 vanishing order relative to  $\lambda_1^*$ .

1111 **Lemma 5.** We have that  $\mathbf{M}^*$  has top eigenvalue  $\lambda_1^* = (1 + o_d(1)) \beta_{d,2}$  with  $\mathbf{v}_1(\mathbf{M}^*) = \mathbf{w}_*$  and  
 1112 for any  $2 \leq i \leq d$ , we have  $|\lambda_i^*| \lesssim \frac{\lambda_1^*}{d}$ .

1113 *Proof.* We have that  $\mathbb{E}_{(y,r,\mathbf{z}) \sim \mathbb{P}_{\mathbf{w}_*}}[\mathcal{T}(y,r) \mid \mathbf{z}] = \sum_{\ell=0}^{\infty} \beta_{d,\ell} Q_\ell(\langle \mathbf{w}_*, \mathbf{z} \rangle)$ . We now analyze  $\mathbf{M}^*$   
 1114 through its quadratic form: for any  $\mathbf{w} \in \mathbb{S}^{d-1}$ , consider

$$\begin{aligned} \mathbf{w}^\top \mathbf{M}^* \mathbf{w} &= \frac{1}{m} \sum_{i=1}^m \mathbb{E}_{(y_i, r_i, \mathbf{z}_i) \sim \mathbb{P}_{\mathbf{w}_*}} [\mathcal{T}(y_i, r_i) d \mathbf{w}^\top (\mathbf{z}_i \mathbf{z}_i^\top - \mathbf{I}_d) \mathbf{w}] = \mathbb{E}_{(y,r,\mathbf{z}) \sim \mathbb{P}_{\mathbf{w}_*}} [\mathcal{T}(y,r) (d \langle \mathbf{w}, \mathbf{z} \rangle^2 - 1)] \\ &= (1 + o_d(1)) \mathbb{E}_{(y,r,\mathbf{z}) \sim \mathbb{P}_{\mathbf{w}_*}} [\mathcal{T}(y,r) Q_2^{(d)}(\langle \mathbf{w}, \mathbf{z} \rangle)] \\ &= (1 + o_d(1)) \beta_{d,2} \frac{Q_2^{(d)}(\langle \mathbf{w}, \mathbf{w}_* \rangle)}{\sqrt{n_{d,2}}} \end{aligned}$$

where we used the fact that  $Q_2^{(d)}(z) = (1 + o_d(1))(dz^2 - 1)$ . As  $Q_2^{(d)}(\cdot)$  has its maximum value at 1. Clearly, the  $\mathbf{w}^\top \mathbf{M}^* \mathbf{w}$  is maximized for  $\mathbf{w} = \mathbf{w}_*$ , and thus it is an eigenvector with the eigenvalue

$$\lambda_1^* = (1 + o_d(1)) \beta_{d,2} Q_2^{(d)}(1) / \sqrt{n_{d,2}} = (1 + o_d(1)) \beta_{d,2}.$$

It suffices to show that the other eigenvalues are of much lower magnitude. For any  $\mathbf{w} \perp \mathbf{w}_*$ , we have  $Q_2^{(d)}(\langle \mathbf{w}, \mathbf{w}_* \rangle) = Q_2^{(d)}(0) = (1 + o_d(1))(-1)$ , and thus, for  $2 \leq i \leq d$ , we have

$$|\lambda_i^*| = (1 + o_d(1)) \frac{\beta_{d,2}}{\sqrt{n_{d,2}}} \lesssim \frac{\lambda_1^*}{d}.$$

1115 □

1116 Our goal is to ensure that the top eigenvectors  $\hat{\mathbf{w}} = \mathbf{v}_1(\mathbf{M}_m)$  and  $\mathbf{w}_* = \mathbf{v}_1(\mathbf{M}^*)$  are close to  
 1117 each other, when  $m$  is chose sufficiently large. By Davis-Kahan's theorem, it suffices to show the  
 1118 concentration between the empirically estimated matrix  $\mathbf{M}_m$ , and its expectation, in the following  
 1119 sense.

**Lemma 6.** There exists a constant  $C > 0$  (only depending on  $k$ ) such that, for any  $\delta > 0$ , with

$$m \geq C \frac{\kappa_\ell d}{\beta_{d,2}^2} \left( 1 + \beta_{d,2} \log^{k/2+2} \left( \frac{d}{\delta \beta_{d,2}^2} \right) \right)$$

we have that with probability  $1 - \delta$ ,

$$\|\mathbf{M}_m - \mathbf{M}^*\|_{\text{op}} \leq \frac{\lambda_1^*}{8},$$

1120 where recall that  $\lambda_1^*$  is the top eigenvalue of  $\mathbf{M}^*$  (see Lemma 5).

1121 *Proof.* Our goal is to use Lemma 28, with  $\mathbf{Y}_i = \frac{1}{m} (\mathcal{T}(y_i, r_i) (d \mathbf{z}_i \mathbf{z}_i^\top - \mathbf{I}_d) - \mathbf{M}^*) \in \mathbb{R}^{d \times d}$  which  
 1122 are zero mean, and thus,  $\mathbf{Y} = \mathbf{M}_m - \mathbf{M}^*$ . Let us bound the each quantity of interest

$$\begin{aligned} \sigma^2 &= \mathbb{E}[(\mathbf{M}_m - \mathbf{M}^*)^2]_2 = \frac{1}{m} \mathbb{E}[(\mathbf{M}_1 - \mathbf{M}^*)^2]_2 \leq \frac{2}{m} \mathbb{E}[\mathbf{M}_1^2]_2 \\ &\leq \frac{2}{m} \sup_{\mathbf{w} \in \mathbb{S}^{d-1}} \mathbf{w}^\top \mathbb{E}[\mathbf{M}_1^2] \mathbf{w} \\ &= \frac{2}{m} \sup_{\mathbf{w} \in \mathbb{S}^{d-1}} \mathbb{E}_{(y,r,\mathbf{z}) \sim \mathbb{P}_{\mathbf{w}_*}} [\mathcal{T}(y,r)^2 ((d^2 - 2d) \mathbf{z} \mathbf{z}^\top + \mathbf{I}_d)] \mathbf{w} \\ &= \frac{2}{m} \sup_{\mathbf{w} \in \mathbb{S}^{d-1}} \mathbb{E}_{(y,r,\mathbf{z}) \sim \mathbb{P}_{\mathbf{w}_*}} [\mathcal{T}(y,r)^2 ((d^2 - 2d) \langle \mathbf{w}, \mathbf{z} \rangle^2 + 1)] \end{aligned}$$

1123 We now note that  $g(\mathbf{z}) = (d^2 - 2d) \langle \mathbf{w}, \mathbf{z} \rangle^2 + 1$  is a polynomial of degree 2 with  $\|g(\mathbf{z})\|_{L^2(\tau_d)} \lesssim d$ .  
 1124 Therefore using spherical hypercontractivity (Lemma 25), we have  $\|g(\mathbf{z})\|_{L^p(\tau_d)} \lesssim p \cdot d$ . Applying  
 1125 Lemma 27 then gives us

$$\mathbb{E}_{(y,r,\mathbf{z}) \sim \mathbb{P}_{\mathbf{w}_*}} [\mathcal{T}(y,r)^2 \cdot ((d^2 - 2d) \cdot \langle \mathbf{w}, \mathbf{z} \rangle^2 + 1)] \lesssim d \cdot \|\mathcal{T}\|_2^2 \cdot \max \left( 1, \log \left( \frac{\|\mathcal{T}\|_4}{\|\mathcal{T}\|_2} \right) \right) \lesssim d \log(\kappa_\ell)$$

where we used the fact that  $\|\mathcal{T}\|_2^2 = 1$  and  $\|\mathcal{T}\|_4 \lesssim \log(\kappa_\ell)$ . We finally obtain that

$$\sigma \lesssim \sqrt{\frac{d \log \kappa_\ell}{m}}.$$

1126 We next analyze the other variance term using similar idea:

$$\begin{aligned} \sigma_*^2 &:= \sup_{\mathbf{u}, \mathbf{v} \in \mathbb{S}^{d-1}} \mathbb{E}[(\mathbf{u}^\top (\mathbf{M}_m - \mathbf{M}^*) \mathbf{v})^2] = \frac{1}{m} \sup_{\mathbf{u}, \mathbf{v} \in \mathbb{S}^{d-1}} \mathbb{E}[(\mathbf{u}^\top (\mathbf{M}_1 - \mathbf{M}) \mathbf{v})^2] \leq \frac{4}{m} \sup_{\mathbf{u}, \mathbf{v} \in \mathbb{S}^{d-1}} \mathbb{E}[(\mathbf{u}^\top \mathbf{M}_1 \mathbf{v})^2] \\ &\leq \frac{4}{m} \sup_{\mathbf{u}, \mathbf{v} \in \mathbb{S}^{d-1}} \mathbb{E}[\mathcal{T}(y, r)^2 (d \langle \mathbf{u}, \mathbf{z} \rangle \langle \mathbf{v}, \mathbf{z} \rangle - \langle \mathbf{u}, \mathbf{v} \rangle)^2] \end{aligned}$$

1127 We would like to use Lemma 27 to bound the expectation, for which we will first obtain a tight bound  
1128 on all the moments of  $g(\mathbf{z}) := (d \langle \mathbf{u}, \mathbf{z} \rangle \langle \mathbf{v}, \mathbf{z} \rangle - \langle \mathbf{u}, \mathbf{v} \rangle)^2$ . Let us compute

$$\begin{aligned} \|g\|_{L^2(\tau_d)} &\lesssim \mathbb{E}[d^4 \langle \mathbf{u}, \mathbf{z} \rangle^4 \langle \mathbf{v}, \mathbf{z} \rangle^4 + 1]^{1/2} = (d^4 \mathbb{E}[\langle \mathbf{u}, \mathbf{z} \rangle^4 \langle \mathbf{v}, \mathbf{z} \rangle^4] + 1)^{1/2} \\ &\leq (d^4 \sqrt{\mathbb{E}[\langle \mathbf{u}, \mathbf{z} \rangle^8] \mathbb{E}[\langle \mathbf{v}, \mathbf{z} \rangle^8]} + 1)^{1/2} = (d^4 \cdot \mathbb{E}[z_1^8] + 1)^{1/2} \lesssim 1. \end{aligned}$$

In the above, we used the Cauchy-Schwarz inequality, rotational invariance of  $\tau_d$ , and  $\mathbb{E}[z_1^8] \lesssim 1/d^4$  respectively. Using hypercontractivity (Lemma 25), we have  $\|g\|_{L^p(\tau_d)} \lesssim (p-1)^2$ . We now use Lemma 27 to conclude that

$$\sigma_* \lesssim \sqrt{\frac{1}{m} \sup_{\mathbf{u}, \mathbf{v} \in \mathbb{S}^{d-1}} \mathbb{E}[\mathcal{T}(y, r)^2 (d \langle \mathbf{u}, \mathbf{z} \rangle \langle \mathbf{v}, \mathbf{z} \rangle - \langle \mathbf{u}, \mathbf{v} \rangle)^2]} \lesssim \sqrt{\frac{\|\mathcal{T}\|_2^2 \cdot \max(1, \log(\frac{\|\mathcal{T}\|_4}{\|\mathcal{T}\|_2}))}{m}} \lesssim \sqrt{\frac{\log(\kappa_\ell)}{m}},$$

again we used that  $\|\mathcal{T}\|_4 \lesssim \kappa_\ell$ . Our next goal is to compute  $\bar{R} = \mathbb{E}[\max_{i \in [n]} \|\mathbf{Y}_i\|_2^2]^{1/2}$ , where  $\mathbf{Y}_i = \frac{1}{m}(\mathcal{T}(y_i, r_i) d \mathbf{z}_i \mathbf{z}_i^\top - \mathbf{M}^*)$ . And thus,  $\|\mathbf{Y}_i\|_2 \leq \frac{1}{m}(d|\mathcal{T}(y_i, r_i)| + \|\mathbf{M}^*\|_2) \lesssim \frac{1}{m}(d|\mathcal{T}(y_i, r_i)| + \beta_{d,2})$ , using Lemma 5. For any  $p \geq 3$ , bounding the  $p^{\text{th}}$  moment

$$\mathbb{E}[\|\mathbf{Y}_i\|_2^p]^{1/p} \lesssim \frac{1}{m} (d\|\mathcal{T}\|_p + \beta_{d,2}) \lesssim \frac{d \kappa_\ell p^{k/2}}{m},$$

Using Lemma 29, we have

$$\bar{R} = \mathbb{E} \left[ \max_{i \in [m]} \|\mathbf{Y}_i\|_2^2 \right]^{1/2} \lesssim \frac{d \cdot \kappa_\ell \log^{k/2} m}{m}.$$

The threshold for choosing  $R$  is:

$$\sigma^{1/2} \bar{R}^{1/2} + \sqrt{2} \bar{R} \lesssim \sqrt{\left( \frac{d \log \kappa_\ell}{m} \right)^{1/2} \cdot \frac{d \kappa_\ell \log^{k/2} m}{m}} + \frac{d \kappa_\ell \log^{k/2} m}{m} \lesssim \frac{d \kappa_\ell \log^{k/2} m}{m},$$

where in the last step, we used the fact that we are in the regime  $m \geq d$ , only keeping the dominant term. Therefore, for any  $\delta \geq 0$  we can choose some  $R$  that satisfies

$$R \lesssim \frac{d \kappa_\ell \log^{k/2}(m/\delta)}{m} \quad \text{and} \quad \mathbb{P}(\max_{i \in [m]} \|\mathbf{Y}_i\|_2 \geq R) \leq \delta/2,$$

where in the last inequality, we used Lemma 29. Finally, we apply Lemma 28. With probability  $1 - \delta/2 - de^{-t}$ , we have

$$\|\mathbf{M}_m - \mathbf{M}^*\|_{\text{op}} \lesssim \sqrt{\frac{d \log(\kappa_\ell)}{m}} + t^{1/2} \sqrt{\frac{\log \kappa_\ell}{m}} + \left( \frac{d \kappa_\ell \log^{k/2}(m/\delta)}{m} \cdot \frac{d \log \kappa_\ell}{m} \right)^{1/3} t^{2/3} + \frac{d \kappa_\ell \log^{k/2}(m/\delta)}{m} t.$$

1129 Choosing  $t = \log(2d/\delta)$ , we obtain with probability  $1 - \delta$ ,

$$\begin{aligned} \|\mathbf{M}_m - \mathbf{M}^*\|_{\text{op}} &\lesssim \sqrt{\frac{d \log \kappa_\ell}{m}} + \sqrt{\frac{\log(\kappa_\ell) \log(d/\delta)}{m}} + \left( \frac{d^2 \kappa_\ell \log \kappa_\ell \log^{k/2}(m/\delta) \log^2(d/\delta)}{m^2} \right)^{1/3} \\ &\quad + \frac{d \kappa_\ell \log^{k/2}(m/\delta) \log(d/\delta)}{m}. \end{aligned}$$

Therefore, there exists a constant  $C > 0$  such that, for

$$m_0 = \frac{C \kappa_\ell d}{\beta_{d,2}^2} \left( 1 + \beta_{d,2} \log^{k/2+2} \left( \frac{d}{\delta \beta_{d,2}^2} \right) \right)$$

any  $m \geq m_0$ , with probability  $1 - \delta$ ,

$$\|\mathbf{M}_m - \mathbf{M}^*\|_{\text{op}} \leq \frac{\beta_{d,2}}{16} \leq \frac{\lambda_1^*}{8}.$$

1130

□

**Proof of Theorem 2: Spectral algorithm, case  $\ell = 2$ :** For any transformation  $\mathcal{T}_\ell$  satisfying requirement Requirement 1, we have that choosing  $m$  sufficiently large that is

$$m \leq \frac{C \kappa_\ell d}{\beta_{d,2}^2} \left( 1 + \beta_{d,2} \log^{k/2+2} \left( \frac{d}{\delta \beta_{d,2}^2} \right) \right)$$

by Davis and Kahn's theorem, we have

$$\min_{s \in \{\pm 1\}} \|s \mathbf{v}_1(\mathbf{M}_m) - \mathbf{v}_1(\mathbf{M}^*)\|_2 \leq \frac{\|\mathbf{M}_m - \mathbf{M}^*\|_{\text{op}}}{|\lambda_1^* - \lambda_2^*|}.$$

According to Lemma 5, this corresponds to

$$\min_{s \in \{\pm 1\}} \|s \hat{\mathbf{w}} - \mathbf{w}_*\|_2 \leq \frac{\lambda_1^*/8}{(1 + o(1)) \lambda_1^*} \leq \frac{1}{4}.$$

1131 Rearranging terms, we obtain  $|\langle \hat{\mathbf{w}}, \mathbf{w}_* \rangle| \geq 1/4$ . Finally, the above sample complexity bound of  $m$   
1132 simplifies to the one provided in Theorem 2 under the stronger Assumption 2.

## 1133 D.2 Analysis for $\ell = 1$

1134 We now analyze the case  $\ell = 1$  case, where the analysis is even simpler and follows by concentration  
1135 of vector to its expected value. For simplicity, we will denote  $\mathcal{T} = \mathcal{T}_1$ . Let us first evaluate the  
1136 expectation of the vector statistic  $\mathbf{v}_m$  computed by the algorithm.

1137 **Lemma 7.** *We have that  $\mathbb{E}[\hat{\mathbf{v}}_m] = \beta_{d,1} \cdot \mathbf{w}_*$ .*

1138 *Proof.* For any  $i \in [d]$ ,

$$\begin{aligned} \mathbb{E}[\mathbf{v}_m]_i &= \mathbb{E}_{(y,r,\mathbf{z}) \sim \mathbb{P}_{\mathbf{w}_*}} [\mathcal{T}(y,r) Q_1^{(d)}(z_i)] = \mathbb{E}_{(y,r,\mathbf{z}) \sim \mathbb{P}_{\mathbf{w}_*}} [\mathcal{T}(y,r) Q_1^{(d)}(\langle \mathbf{z}, \mathbf{e}_i \rangle)] \\ &= \sum_{\ell=0}^{\infty} \beta_{d,\ell} \mathbb{E}_{(y,r,\mathbf{z}) \sim \mathbb{P}_{\mathbf{w}_*}} [Q_\ell^{(d)}(\langle \mathbf{w}_*, \mathbf{z} \rangle) Q_1^{(d)}(\langle \mathbf{z}, \mathbf{e}_i \rangle)] = \beta_{d,1} Q_1(\langle \mathbf{w}_*, \mathbf{e}_i \rangle) / \sqrt{n_{d,1}} \\ &= \beta_{d,1} \cdot (\mathbf{w}_*)_i. \end{aligned}$$

1139 We conclude that  $\mathbb{E}[\mathbf{v}_m] = \beta_{d,1} \mathbf{w}_*$ .

□

1140 We now show that for sufficiently large sample size, our final estimator  $\hat{\mathbf{w}}$  has the desired overlap  
1141 with the ground-truth  $\mathbf{w}_*$  via concentration arguments.

**Lemma 8.** *There exists a universal constant  $C > 0$  such that for any  $\delta > 0$  and any*

$$m \geq \frac{C \kappa_\ell \sqrt{d}}{\beta_{d,1}^2} \left( 1 + \frac{1}{\sqrt{d}} \log^{(k+1)/2} \left( \frac{d \kappa_\ell}{\delta \beta_{d,1}} \right) \right) \quad \text{and} \quad m \geq \frac{C \kappa_\ell d}{\beta_{d,1}^2} \left( 1 + \frac{1}{d} \log^{(k+1)/2} \left( \frac{d \kappa_\ell}{\delta \beta_{d,1}} \right) \right),$$

respectively, with probability  $1 - \delta$ , we have

$$\frac{\langle \mathbf{v}_m, \mathbf{w}_* \rangle}{\|\mathbf{v}_m\|_2} \geq \frac{d^{-1/4}}{4} \quad \text{and} \quad \frac{\langle \mathbf{v}_m, \mathbf{w}_* \rangle}{\|\mathbf{v}_m\|_2} \geq \frac{1}{4}.$$

1142 *Proof.* Denote  $\mathbf{v}^* = \mathbb{E}[\mathbf{v}_m]$  and define  $X_i := \frac{1}{m}(\mathcal{T}(y, r)\sqrt{d}\langle \mathbf{z}_i, \mathbf{w}_* \rangle - \langle \mathbf{v}^*, \mathbf{w}_* \rangle)$ . Calculating the  
 1143 variance

$$\sigma^2 = \sum_{i=1}^m \mathbb{E}[X_i^2] \lesssim \frac{1}{m} \mathbb{E}_{(y, r, \mathbf{z}) \sim \mathbb{P}_{\mathbf{w}_*}} [\mathcal{T}(y, r)^2 d \langle \mathbf{z}, \mathbf{w}_* \rangle^2] \lesssim \frac{\log \kappa_\ell}{m},$$

where in the last inequality we used Lemma 27 and the fact that  $\|\mathcal{T}\|_2 = 1$  and  $g(\mathbf{z}) = d \langle \mathbf{w}_*, \mathbf{z} \rangle^2$  is a polynomial of degree two with  $\|g\|_2 \lesssim 1$ . Moreover, for any  $p \geq 2$

$$\|X_i\|_p \leq \frac{1}{m} \left( \mathbb{E}[|\mathcal{T}(y_i, r_i)|^p |Q_1(\langle \mathbf{w}_*, \mathbf{z}_i \rangle)|^p]^{1/p} + \beta_{d,1} \right) \lesssim \frac{(\|\mathcal{T}\|_{2p} \|Q_1\|_{2p} + \beta_{d,1})}{m} \lesssim \frac{\kappa_\ell p^{(k+1)/2}}{m},$$

where in the last inequality, we used  $\langle \mathbf{v}^*, \mathbf{w}_* \rangle = \beta_{d,1} \leq 1$  (cf. Lemma 7) and  $\|\mathcal{T}\|_{2p} \leq \kappa_\ell (2p)^{k/2}$  and  $\|Q_1\|_{2p} \leq \sqrt{2p}$  by hypercontractivity (Lemma 25). Applying Lemma 30, with probability  $1 - \delta$ ,

$$|\langle \mathbf{v}_m - \mathbf{v}^*, \mathbf{w}_* \rangle| \lesssim \sqrt{\frac{\log(\kappa_\ell) \log(1/\delta)}{m}} + \frac{\kappa_\ell \log(1/\delta) \log^{(k+1)/2}(m/\delta)}{m}.$$

1144 Therefore, there is a constant  $C > 0$  such that with any  $m \geq C \kappa_\ell \sqrt{d} / \beta_{d,1}^2$ , with probability  $1 - e^{-d^c}$   
 1145 for small enough  $c > 0$

$$|\langle \mathbf{v}_m - \mathbf{v}^*, \mathbf{w}_* \rangle| \leq \frac{\beta_{d,1}}{4} \quad (55)$$

Now let  $\mathbf{v}_m^\perp = \mathbf{v}_m - \langle \mathbf{v}_m, \mathbf{w}_* \rangle \mathbf{w}_*$  be the component of  $\mathbf{v}_m$  orthogonal to  $\mathbf{w}_*$ . Our goal is to find a high probability bound on  $\|\mathbf{v}_m^\perp\|_2$ . Due to spherical symmetry, w.l.o.g., fix  $\mathbf{w}_* = \mathbf{e}_1$  and so  $S \sim \mathbb{P}_{\mathbf{e}_1}^m$ , and the norm of the desired vector is given by

$$\|\mathbf{v}_m^\perp\|_2 = \sqrt{\sum_{j=2}^d (\mathbf{v}_m)_j^2} \text{ where } \mathbf{v}_m^\perp = \frac{1}{m} \sum_{i=1}^m \mathcal{T}(y_i, r_i) \sqrt{d} \langle \mathbf{z}_i \rangle_{-1}.$$

Observe that  $\mathbf{v}_m^\perp$  is a linear combination of  $m$  i.i.d. vectors, however, the coefficients of linear combinations  $\mathcal{T}(y_i, r_i)$  are not independent from the vectors  $\langle \mathbf{z}_i \rangle_{-1}$  themselves, since it is coupled with  $z_{i,1}$ . We will decouple the laws and make coefficients independent of the vectors. To this end, consider  $(y, r, \mathbf{z}) \sim \mathbb{P}_{\mathbf{e}_1}$  and  $\tilde{\mathbf{z}} \sim \tau_{d-1}$  independent of  $(y, r, \mathbf{z})$ . Then the following two random variables have identical laws:

$$\mathcal{T}(y, r) \sqrt{d} \langle \mathbf{z} \rangle_{-1} \equiv \frac{\mathcal{T}(y, r)}{\sqrt{1 - z_1^2}} \sqrt{d} \tilde{\mathbf{z}}$$

Using such argument for each of  $m$  samples, and  $\mathbf{v}_m^\perp$  viewed as a random vector of variables  $(\sqrt{d} \tilde{\mathbf{z}}_i)_{i \in [m]}$  is sub-gaussian with variance parameter  $\sigma_*^2 \leq \frac{1}{m^2} \sum_{i=1}^m \frac{\mathcal{T}(y_i, r_i)^2}{(1 - z_{i,1}^2)}$ . Thus, with probability  $1 - 2e^{-d}$ , we have  $\|\mathbf{v}_m^\perp\|_2 \lesssim \sigma_* \sqrt{d}$ . Therefore, it suffices to bound  $\sigma_*$ . By Lemma 30, for any  $\delta > 0$  such that  $\log(1/\delta) < cd$  for some  $c > 0$ , we have with probability  $1 - \delta/2$ ,

$$\sigma_*^2 \lesssim \mathbb{E}[\sigma_*^2] + \frac{\sqrt{\kappa_\ell \log \kappa_\ell}}{m^{1.5}} \sqrt{\log(1/\delta)} + \frac{\kappa_\ell^2 \log(1/\delta) \log(m/\delta)^k}{m^2}.$$

Here, the condition  $\log(1/\delta) < cd$  arises from the fact the function  $g(z) = 1/(1 - z_1^2)$  has  $\|g\|_p \lesssim 1$  only for some  $p < cd$  for some universal constant  $c > 0$ .

$$\sigma_*^2 \lesssim \frac{\log \kappa_\ell}{m} + \frac{\sqrt{\kappa_\ell \log \kappa_\ell}}{m^{1.5}} \sqrt{\log(1/\delta)} + \frac{\kappa_\ell^2 \log(1/\delta) \log(m/\delta)^k}{m^2}.$$

1146 Finally, for any  $\delta < e^{-d^c}$ , choosing sample size

$$m \geq \frac{C \kappa_\ell \sqrt{d}}{\beta_{d,1}^2} \left( 1 + \frac{1}{\sqrt{d}} \log^{(k+1)/2} \left( \frac{d \kappa_\ell}{\delta \beta_{d,1}} \right) \right), \quad (56)$$

1147 with probability  $1 - \delta/2 - e^{-2d}$

$$\sigma_*^2 \lesssim \frac{\beta_{d,1}^2}{C \sqrt{d}}, \quad \text{and thus,} \quad \|\mathbf{v}_m^\perp\| \lesssim \sigma_* \sqrt{d} \lesssim \frac{\beta_{d,1} \sqrt{d}}{\sqrt{C \sqrt{d}}} \leq \frac{\beta_{d,1} d^{1/4}}{\sqrt{C}}.$$

For  $C > 1$  sufficiently large, we obtain with probability  $1 - \delta/2 - e^{-2d}$ ,

$$\|\mathbf{v}_m^\perp\|_2 \leq \beta_{d,1} d^{1/4}$$

Combining this with (55), with probability  $1 - \delta/2 - e^{-2d} - e^{-d^c}$

$$\|\mathbf{v}_m - \mathbf{v}^*\|_2 \leq 2\beta_{d,1} d^{1/4}.$$

Therefore, we finally analyze our overlap combining with (55). For  $C > 0$  sufficiently large, for any  $\delta > 0$ , for any  $m \geq \frac{C\kappa_\ell \sqrt{d}}{\beta_{d,1}^2} \left(1 + \frac{1}{\sqrt{d}} \log^{(k+1)/2} \left(\frac{\kappa_\ell d}{\beta_{d,1} \delta}\right)\right)$ , with probability  $1 - \delta$ ,

$$\frac{\langle \mathbf{v}_m, \mathbf{w}_* \rangle}{\|\mathbf{v}_m\|_2} \geq \frac{\langle \mathbf{v}^*, \mathbf{w}_* \rangle + \langle \mathbf{v}_m - \mathbf{v}^*, \mathbf{w}_* \rangle}{\|\mathbf{v}^*\|_2 + \|\mathbf{v}_m - \mathbf{v}^*\|_2} \geq \frac{\beta_{d,1} - \beta_{d,1}/4}{\beta_{d,1} + 2\beta_{d,1} d^{1/4}} \geq \frac{d^{-1/4}}{4}.$$

Similarly, if in Eq.(56), we instead chose a sample of size  $m \geq \frac{C\kappa_\ell d}{\beta_{d,1}^2} \left(1 + \frac{1}{d} \log^{(k+1)/2} \left(\frac{\kappa_\ell d}{\delta \beta_{d,1}}\right)\right)$  for sufficiently large  $C > 1$ , then we obtain a tighter control on  $\|\mathbf{v}_m - \mathbf{v}^*\|_2$ , and directly achieve weak recovery. With probability  $1 - \delta/2 - e^{-2d} - e^{-d^c}$

$$\|\mathbf{v}_m^\perp\|_2 \lesssim \sigma_* \sqrt{d} \lesssim \frac{\beta_{d,1} \sqrt{d}}{\sqrt{Cd}} \leq \frac{\beta_{d,1}}{\sqrt{C}} \quad \text{and} \quad \|\mathbf{v}_m - \mathbf{v}^*\|_2 \leq 2\beta_{d,1}.$$

Combining this with (55), with probability  $1 - \delta$

$$\frac{\langle \mathbf{v}_m, \mathbf{w}_* \rangle}{\|\mathbf{v}_m\|_2} \geq \frac{\langle \mathbf{v}^*, \mathbf{w}_* \rangle + \langle \mathbf{v}_m - \mathbf{v}^*, \mathbf{w}_* \rangle}{\|\mathbf{v}^*\|_2 + \|\mathbf{v}_m - \mathbf{v}^*\|_2} \geq \frac{\beta_{d,1} - \beta_{d,1}/4}{\beta_{d,1} + 2\beta_{d,1}} = \frac{1}{4}.$$

1148

□

Note that the regime of interest where we can hope to succeed in polynomial sample and runtime is when  $\|\xi_{d,1}\|_{L^2} \gg \text{poly}(d)^{-1}$  i.e. which corresponds to  $\beta_{d,1} \gg \text{poly}(d)^{-1}$  for  $\mathcal{T}$  from Requirement 1. In this regime, Lemma 8 establishes that with sample complexity

$$m \leq \frac{C\kappa_\ell \sqrt{d}}{\beta_{d,1}^2} \sqrt{\log(1/\delta)} \quad \text{and} \quad m \leq \frac{C\kappa_\ell d}{\beta_{d,1}^2} \sqrt{\log(1/\delta)}$$

one can achieve the overlaps

$$|\langle \hat{\mathbf{w}}, \mathbf{w}_* \rangle| \geq d^{-1/4}/4 \quad \text{and} \quad |\langle \hat{\mathbf{w}}, \mathbf{w}_* \rangle| \geq 1/4.$$

1149 This nearly finishes the proof of Theorem 2 for the case  $\ell = 1$  (under stronger Assumption 2). De-  
1150 pending on the problem, the sample complexity bound either matches the one provided in Theorem 2,  
1151 or it is suboptimal by a factor of  $O(\sqrt{d})$ . In the latter case, we can first get to  $\Omega_d(d^{-1/4})$  overlap,  
1152 followed by another boosting phase, as long as the following assumption holds.

1153 **Assumption 4.** There exists  $\ell \geq 3$  and  $c > 0$  such that  $\frac{\sqrt{d}^\ell}{\|\xi_{d,\ell}\|_{L^2}^2} \leq c \left( \frac{\sqrt{d}}{\|\xi_{d,1}\|_{L^2}^2} \vee d \right)$ .

1154 Note that this assumption holds for Gaussian SIMs according to the discussion in Section 4, i.e. all  
1155  $\ell \equiv k_* \bmod 2$  are all optimal for samples. The next section is dedicated to showing the guarantee for  
1156 boosting procedure.

### 1157 D.3 Boosting the overlap to achieve weak recovery

1158 We now show how to boost the overlap from  $\Omega_d(d^{-1/4})$  to  $\Omega_d(1)$  using the following procedure.

1159

---

**Algorithm 3:** A single step of the boosting algorithm on  $\ell \geq 3$ .

---

**Input :** An example set  $S = \{(\mathbf{x}_i, y_i) : i \in [m]\} \sim_{iid} \mathbb{P}_{\mathbf{w}_*}$ , the frequency  $\ell \geq 3$ , a transformation  $\mathcal{T}_\ell$ , and a vector  $\mathbf{w}_0$  such that  $\langle \mathbf{w}_0, \mathbf{w}_* \rangle \geq d^{-1/4}/4$ .

**Output :** The vector  $\hat{\mathbf{w}}$ .

- 1 Let  $\Upsilon = \lceil \log d \rceil$  be the total number of steps to be taken.
  - 1160 2 Divide the training set  $S = \{S^{(t)}\}_{t \in [\Upsilon]}$  into disjoint collections of  $\Upsilon$  steps, where  
 $|S^{(t)}| = |S|/2^{t+2}$ .
  - 3 **for**  $t = 1, \dots, \Upsilon$  **do**
  - 4      $\mathbf{w}_t = \text{boost-step}(\mathbf{w}_{t-1}, S^{(t)})$ .
  - 5 **end**
  - 6 **Return**  $\hat{\mathbf{w}} = \mathbf{w}_\Upsilon$
-

---

**Algorithm 4:** boost-step
 

---

**Input** : An example set  $S$  of size  $m$  and a vector  $\mathbf{v}$  such that  $\langle \mathbf{v}, \mathbf{w}_* \rangle = \alpha \in [d^{-1/4}/4, 1/4]$ .

1161 **Output** : The new vector  $\mathbf{v}_{\text{next}}$  with  $\langle \mathbf{v}_{\text{next}}, \mathbf{w}_* \rangle = \alpha_{\text{next}}$ .

1 Compute  $\hat{\mathbf{v}} = \frac{1}{m} \sum_{i=1}^m \mathcal{T}_\ell(y_i, r_i) Q'_\ell(\langle \mathbf{v}, \mathbf{z}_i \rangle) \mathbf{z}_i$ .

2 Return  $\mathbf{v}_{\text{next}} = \frac{\hat{\mathbf{v}}}{\|\hat{\mathbf{v}}\|_2}$ .

---

1162 We have the following guarantee for one step of boosting algorithm.

**Lemma 9.** *There exists a constant  $C = C(k, \ell)$  and  $c = c(k, \ell)$  such that the following holds. For the input  $\mathbf{v}$  such that  $\langle \mathbf{v}, \mathbf{w}_* \rangle = \alpha \in [d^{-0.25}/4, 1/4]$  of the boost-step procedure (Algorithm 4), we have that for any*

$$m \geq C \kappa_\ell \frac{d}{\beta_{d,\ell}^2 \alpha^{2\ell-4}},$$

1163 *with probability  $1 - e^{-d^c}$ , we have  $\alpha_{\text{next}} = \langle \mathbf{v}_{\text{next}}, \mathbf{w}_* \rangle \geq 2\alpha$ .*

1164 Using this lemma we can obtain the following theorem on the performance of the boosting algorithm.

**Theorem 4.** *There exists a constant  $C = C(k, \ell) > 1$  and  $c = c(k, \ell) > 0$  such that the following holds. On the initialization  $|\langle \mathbf{w}_0, \mathbf{w}_* \rangle| \geq d^{-1/4}/4$ , the boosting algorithm (Algorithm 3) on the training set  $S$  whose size is*

$$m \leq C \kappa_\ell \frac{\sqrt{d^\ell}}{\beta_{d,\ell}^2},$$

1165 *with probability  $1 - e^{-d^c}$ , we have  $\langle \hat{\mathbf{w}}, \mathbf{w}_* \rangle \geq 1/4$ .*

*Proof.* According to Lemma 9, choosing  $|S^{(1)}| \gtrsim \frac{\kappa_\ell d}{\beta_{d,\ell}^2 \alpha_0^{2\ell-4}} \asymp \frac{\kappa_\ell \sqrt{d^\ell}}{\beta_{d,\ell}^2}$  (hiding constants in  $k, \ell$ ), with probability  $1 - e^{-d^c}$  we have  $|\langle \mathbf{w}_1, \mathbf{w}_* \rangle| \geq 2\alpha_0$ . The sample size threshold for subsequent iteration is strictly less than 1/2 of the previous one since  $\alpha \in [d^{-1/4}, 1/4]$  and  $\ell \geq 3$ . Therefore, the overlap increases geometrically, and we have  $\langle \mathbf{w}_\Upsilon, \mathbf{w}_* \rangle \geq 1/4$  in  $\Upsilon = \log(d^{1/4}) \asymp \log d$  iterations. The probability of success is still  $1 - e^{-d^c}$  by union bound over  $\log d$  for smaller  $c > 0$ . For the total sample size it suffices to choose,

$$m = |S| \leq \sum_{t=1}^{\Upsilon} |S^{(t)}| = |S^{(1)}| \sum_{t=1}^{\Upsilon} \frac{1}{2^{t-1}} \leq 2|S^{(1)}| \lesssim \kappa_\ell \frac{\sqrt{d^\ell}}{\beta_{d,\ell}^2}.$$

1166 □

1167 We now return to the deferred proof that shows the overlap increases geometrically in the boost-step  
1168 procedure.

1169 *Proof of Lemma 9.* Recall from Appendix B that we use  $P_\ell(\cdot) = Q_\ell(\cdot)/\sqrt{n_{d,\ell}}$  to denote Gegenbauer  
1170 polynomial that is normalized to have  $P_\ell(1) = 1$ . We first note that

$$\begin{aligned} \mathbf{v}^* &= \mathbb{E}[\hat{\mathbf{v}}] = \mathbb{E}_{\mathbb{P}_{\mathbf{w}_*}} [\mathcal{T}_\ell(y, r) Q'_\ell(\langle \mathbf{v}, \mathbf{z} \rangle) \mathbf{z}] = \nabla_{\mathbf{v}} \mathbb{E}_{\mathbb{P}_{\mathbf{w}_*}} [\mathcal{T}_\ell(y, r) Q_\ell(\langle \mathbf{v}, \mathbf{z} \rangle)] \\ &= \beta_{d,\ell} \nabla_{\mathbf{v}} \mathbb{E}[Q_\ell(\langle \mathbf{w}_*, \mathbf{z} \rangle) Q_\ell(\langle \mathbf{v}, \mathbf{z} \rangle)] \\ &= \beta_{d,\ell} \nabla_{\mathbf{v}} P_\ell(\langle \mathbf{w}_*, \mathbf{v} \rangle) = \beta_{d,\ell} P'_\ell(\langle \mathbf{v}, \mathbf{w}_* \rangle) \mathbf{w}_* \\ &= \beta_{d,\ell} P'_\ell(\alpha) \mathbf{w}_*. \end{aligned}$$

Consider any fixed  $\mathbf{w} \in \mathbb{S}^{d-1}$  and consider the following analysis. Define  $X_i = \frac{1}{m} (\mathcal{T}_\ell(y_i, r_i) Q'_\ell(\langle \mathbf{v}, \mathbf{z}_i \rangle) \langle \mathbf{z}_i, \mathbf{w} \rangle - \langle \mathbf{v}, \mathbf{w} \rangle)$ . Using Lemma 27, we can say that

$$\mathbb{E}[X_i^2] \leq \frac{2}{m^2} \mathbb{E}_{\mathbb{P}_{\mathbf{w}}} [\mathcal{T}_\ell(y, r)^2 Q'_\ell(\langle \mathbf{v}, \mathbf{z} \rangle)^2 \langle \mathbf{z}, \mathbf{w} \rangle^2] \lesssim \frac{1}{m^2} \log^\ell(\kappa_\ell),$$

where we used the fact that  $g(\mathbf{z}) = Q'_\ell(\langle \mathbf{v}, \mathbf{z} \rangle)^2 \langle \mathbf{z}, \mathbf{w} \rangle^2$  is a polynomial of degree  $2\ell$  with  $\|g\|_2 \lesssim 1$ . Thus, by Lemma 25, we have  $\|g\|_p \lesssim p^\ell$ , which allows us to use Lemma 27. Similarly, computing

$$\|X_i\|_p \lesssim \frac{1}{m} \mathbb{E}[\underbrace{|\mathcal{T}_\ell(y, r) Q'_\ell(\langle \mathbf{v}, \mathbf{z} \rangle) \langle \mathbf{z}, \mathbf{w} \rangle|}_{:=g(\mathbf{z})}^p]^{1/p} \leq \frac{1}{m} \|\mathcal{T}_\ell\|_{2p} \|g\|_{2p} \lesssim \frac{\kappa_\ell p^{(k+\ell)/2}}{m},$$

where we used the facts that  $\|\mathcal{T}_\ell\|_{2p} \lesssim \kappa_\ell p^{k/2}$  and  $g(\mathbf{z})$  is a polynomial of degree  $\ell$  with  $\|g\|_2 \lesssim 1$ , and thus, by hypercontractivity, we have  $\|g\|_{2p} \lesssim p^{\ell/2}$ . Using Lemma 30, with probability  $1 - \delta$

$$|\langle \hat{\mathbf{v}} - \mathbf{v}^*, \mathbf{w} \rangle| \lesssim \sqrt{\frac{\log^\ell \kappa_\ell \log(1/\delta)}{m}} + \frac{\kappa_\ell \log(1/\delta) \log^{(k+\ell)/2}(m/\delta)}{m}.$$

Therefore, invoking this guarantee for  $\mathbf{w} \in \{\mathbf{w}_*, \mathbf{v}\}$ , we obtain that with probability  $1 - e^{-d^c}$ ,

$$|\langle \hat{\mathbf{v}} - \mathbf{v}^*, \mathbf{w}_* \rangle| + |\langle \hat{\mathbf{v}} - \mathbf{v}^*, \mathbf{v} \rangle| \lesssim \sqrt{\frac{\log^\ell \kappa_\ell \log(1/\delta)}{m}} + \frac{\kappa_\ell \log(1/\delta) \log^{(k+\ell)/2}(m/\delta)}{m}.$$

Our next goal is to bound  $\|\hat{\mathbf{v}}^\perp\|_2$ , where  $\hat{\mathbf{v}}^\perp$  is the component of  $\hat{\mathbf{v}}$  orthogonal to  $\text{span}\{\mathbf{w}_*, \mathbf{v}\}$ . Due to rotational symmetry, w.l.o.g., let us say  $\mathbf{w}_* = \mathbf{e}_1$  and  $\mathbf{v} = \alpha \mathbf{e}_1 + \sqrt{1 - \alpha^2} \mathbf{e}_2$ . Then  $\hat{\mathbf{v}}^\perp = \hat{\mathbf{v}} - (\hat{\mathbf{v}})_1 \mathbf{e}_1 - (\hat{\mathbf{v}})_2 \mathbf{e}_2$ . So our goal is to bound

$$\|\hat{\mathbf{v}}^\perp\|_2 \quad \text{where} \quad \hat{\mathbf{v}} = \frac{1}{m} \sum_{i=1}^m \mathcal{T}_\ell(y_i, r_i) Q'_\ell(\alpha z_{i,1} + \sqrt{1 - \alpha^2} z_{i,2})(\mathbf{z}_i)_{3:d}.$$

Consider the following analysis similar to the proof of Lemma 8. For a single sample  $(y, r, \mathbf{z}) \sim \mathbb{P}_{\mathbf{e}_1}$ , one can define  $\tilde{\mathbf{z}} \sim S^{d-3}$  independent of  $(y, r, \mathbf{z})$ . The following two random variables have identical distribution.

$$\mathcal{T}_\ell(y, r) Q'_\ell(\alpha z_1 + \sqrt{1 - \alpha^2} z_2)(\mathbf{z}_i)_{3:d} \equiv \mathcal{T}_\ell(y, r) \frac{Q'_\ell(\alpha z_1 + \sqrt{1 - \alpha^2} z_2)}{\sqrt{1 - z_1^2 - z_2^2}} \tilde{\mathbf{z}}.$$

Now let us define  $\sqrt{d} \tilde{\mathbf{z}} \sim$  consider  $\mathbf{z}_i^\perp$ , the component of  $\mathbf{z}_i$  that is orthogonal to  $\cdot$ . Using the identical argument from Lemma 7 that  $\hat{\mathbf{v}}^\perp$  is sub-Gaussian in random variables  $(\tilde{\mathbf{z}}_i)_{i \in [m]}$ , with probability  $1 - e^{-2d}$ , we have  $\|\hat{\mathbf{v}}^\perp\| \lesssim \sigma_* \sqrt{d}$ , where the parameter

$$\sigma_*^2 = \frac{1}{m^2} \sum_{i=1}^m \mathcal{T}_\ell(y_i, r_i)^2 \frac{Q'_\ell(\alpha z_{i,1} + \sqrt{1 - \alpha^2} z_{i,2})^2}{d(1 - z_{i,1}^2 - z_{i,2}^2)}.$$

Using exactly the same bounding strategy used in Lemma 8, for any  $\delta \geq d^{-d^c}$ , we have with probability  $1 - e^{-d^c}$ ,

$$\sigma_*^2 \lesssim \frac{\log \kappa_\ell}{m} + \frac{\sqrt{\kappa_\ell \log \kappa_\ell}}{m^{1.5}} \sqrt{\log(1/\delta)} + \frac{\kappa_\ell^2 \log(1/\delta) \log^{k+\ell}(m/\delta)}{m^2}.$$

Overall, we can conclude that there exists some constant  $C(k, \ell) > 1$  such that choosing any

$$m \geq C \kappa_\ell \frac{d}{\beta_{d,\ell}^2 \alpha^{2\ell-4}},$$

with probability  $1 - e^{-d^c}$ ,

$$\|\hat{\mathbf{v}}^\perp\| \lesssim \sigma_* \sqrt{d} \lesssim \frac{\beta_{d,\ell} \alpha^{\ell-2} \sqrt{d}}{\sqrt{Cd}} \leq \frac{\alpha^{\ell-2} \beta_{d,\ell}}{16} \quad \text{and} \quad \langle \hat{\mathbf{v}} - \mathbf{v}^*, \mathbf{w}_* \rangle \leq \frac{\alpha^{\ell-1} \beta_{d,\ell}}{4}.$$

Combining we have

$$\|\hat{\mathbf{v}} - \mathbf{v}^*\|_2 \leq (1 + o(1)) \frac{\alpha^{\ell-2} \beta_{d,\ell}}{8}.$$

1171 Finally, analyzing the quantity of desired interest under this high probability event that happens with  
1172 probability  $1 - e^{-d^c}$ :

$$\begin{aligned} \alpha_{\text{next}} = \langle \mathbf{v}_{\text{next}}, \mathbf{w}_* \rangle &= \frac{\langle \hat{\mathbf{v}}, \mathbf{w}_* \rangle}{\|\hat{\mathbf{v}}\|_2} \geq \frac{\langle \mathbf{v}^*, \mathbf{w}_* \rangle + \langle \hat{\mathbf{v}} - \mathbf{v}^*, \mathbf{w}_* \rangle}{\|\mathbf{v}^*\|_2 + \|\hat{\mathbf{v}} - \mathbf{v}^*\|_2} \geq \frac{\beta_{d,\ell} P'_\ell(\alpha) - \beta_{d,\ell} \alpha^{\ell-1}/100}{\beta_{d,\ell} P'_\ell(\alpha) + \beta_{d,\ell} \alpha^{\ell-2}/50} \\ &\geq (1 + o(1)) \left( \frac{\alpha^{\ell-1} - \frac{\alpha^{\ell-1}}{100}}{\alpha^{\ell-1} + \frac{\alpha^{\ell-2}}{50}} \right) \geq \frac{98\alpha}{50\alpha + 1} \geq 2\alpha. \end{aligned}$$

## 1174 E Online SGD estimator

1175 In this section, we present the analysis of the online SGD on the harmonic loss which corresponds to  
 1176 theorem 2Part 3. As in Section section 3, we will implement the algorithm on  $\mathcal{T}_\ell$  for  $\ell > 2$ . We work  
 1177 under the following assumption

1178 **Assumption 5.** For each  $\ell \geq 1$ , we assume that there exists  $\mathcal{T}_\ell$  such that  $\|\mathcal{T}_\ell\|_{L^2} = 1$ ,  $\|\mathcal{T}_\ell\|_\infty \leq \kappa_\ell$ ,  
 1179 consider  $\mathcal{T}_\ell := \xi_{d,\ell}/\|\xi_{d,\ell}\|_{L^2}$ , and we have the following inequality

$$\|\xi_{d,\ell}\|_{L^4} \leq C\|\xi_{d,\ell}\|_{L^2} \quad , \quad (57)$$

1180 and also we gave the following

$$\mathbb{E}[\mathcal{T}_\ell(y, r)Q_\ell(\langle \mathbf{w}, \mathbf{z} \rangle)] = \beta_{d,\ell} > 0.$$

1181 In the following we introduce the following loss

$$L(\mathbf{w}; \mathbf{z}_i, y_i, r_i) = \left[ (\mathcal{T}_\ell(y, r) - Q_\ell(\langle \mathbf{w}, \mathbf{z} \rangle))^2 \right]. \quad (58)$$

1182 We first present the online SGD algorithm

---

**Algorithm 5:** Online SGD algorithm on the frequency  $\ell$ .

---

**Input** : An example set  $S = \{(\mathbf{x}_i, y_i) : i \in [m]\} \sim_{iid} \mathbb{P}_{\mathbf{w}_*}$ , the frequency  $\ell > 2$ , and a  
 transformation  $\mathcal{T}_\ell$ , a step size  $\eta$  and a number of step-size.

**Output** : An estimator  $\hat{\mathbf{w}} \in \mathbb{R}^d$ .

```

1 Decompose  $\mathbf{x}_i = (r_i, \mathbf{z}_i)$ .
2 Sample  $\mathbf{w}_0 \in \mathbb{S}^{d-1}$ .
1183 3 for  $i = 1, \dots, N$  do
4   | Compute  $L_i := L(\mathbf{w}_{i-1}; \mathbf{z}_i, y_i, r_i)$ 
5   | Let  $\mathbf{w}_i := \frac{\mathbf{w}_{i-1} - \eta \nabla_{\mathbf{w}_{i-1}}^{d-1} L_i}{\|\mathbf{w}_{i-1} - \nabla_{\mathbf{w}_{i-1}}^{d-1} L_i\|}$ 
6 end
7 Return  $\hat{\mathbf{w}}_N$ .
```

---

1184 We state the formal statement for weak recovery of online SGD. We focus on weak recovery, and  
 1185 refer to the section for explanations on how to boost the weak to strong recovery. We also only focus  
 1186 on  $\ell > 3$ , however notice that the proof can be adapted to the cases  $\ell \in \{1, 2\}$ .

1187 **Theorem 5** (Online SGD for learning  $\nu_d$ ). Let  $(\mathbf{w}_t)_{t \geq 0}$  the iterates of the SGD dynamics with the  
 1188 loss given by Eq.(58), with  $b > s_\ell$  (where  $s_\ell$  only depends on  $\ell$ ) then conditionally on  $m_0 \geq \frac{b}{\sqrt{d}}$ , we  
 1189 then have

$$\tau_{1/2}^+ \leq \frac{C_\ell d^{\ell-1}}{\beta_{d,\ell}^2},$$

1190 with probability at least  $c > 0$  for some constant  $c > 0$ .

1191 The good initialization probability is at least constant [49]. Thus, the above online SGD algorithm  
 1192 succeeds in total with probability at least constant bounded away from zero. We can then boost the  
 1193 confidence to  $1 - \delta$  by just choosing the best estimator over multiple starts, and  $O(\log(1/\delta))$  trails  
 1194 suffice.

1195 Let introduce some notations for the following, denote  $m_t = \langle \mathbf{w}_t, \mathbf{w}_* \rangle$ , we define  $\tau_c^- = \inf\{t \geq$   
 1196  $0: m_t \leq c\}$ , and  $\tau_c = \inf\{t \geq 0: m_t \geq c\}$ .

1197 *Proof of theorem 5.* Let  $\ell \geq 3$ . Consider a transformation  $\mathcal{T}_\ell$  given by assumption 5. We then have  
 1198 the following

$$\mathbb{E}[\mathcal{T}(y, r)|\mathbf{z}] = \sum_{\ell=0}^{\infty} \beta_{d,\ell} Q_\ell(\langle \mathbf{z}, \mathbf{w}_* \rangle).$$

1199 We first state a lemma on the population loss defined as

$$\mathcal{L}(\mathbf{w}) = \mathbb{E}[L(\mathbf{w}; \mathbf{z}, y, r)]. \quad (59)$$

1200 **Lemma 10** (Population loss). *Let  $\ell \geq 1$ , consider the normalized transformation  $\mathcal{T}_\ell$  given by*  
 1201 *Assumption 5, we then have the following inequality*

$$\forall m \geq 2\sqrt{\frac{s^*}{d}}, \quad \langle \nabla_{\mathbf{w}}^{\mathbb{S}^{d-1}} \mathcal{L}(\mathbf{w}), \mathbf{w}_* \rangle \leq -2(1 - m^2)\beta_{d,\ell} \frac{\ell(\ell + d - 2)}{d - 1} \langle \mathbf{w}, \mathbf{w}_* \rangle^{\ell-1}, \quad (60)$$

1202 where  $s^* = \sqrt{\frac{(\ell-2)(\ell+d-3)}{(\ell-d/2-3)(\ell+d/2-2)}} \cos(\pi/\ell)$ .

1203 **Discretization bounds.** In this part, we give bounds on the discretization error from the online SGD  
 1204 and the population loss gradient flow. Consider the SGD iterations

$$\mathbf{w}_{t+1} = \frac{\mathbf{w}_t - \eta \nabla_{\mathbf{w}}^{\mathbb{S}^{d-1}} L(\mathbf{w}_t; \mathbf{z}_t, r_t, y_t)}{\|\mathbf{w}_t - \eta \nabla_{\mathbf{w}}^{\mathbb{S}^{d-1}} L(\mathbf{w}_t; \mathbf{z}_t, r_t, y_t)\|},$$

1205 initialized at  $\mathbf{w}_0$  uniformly on the sphere  $\mathbb{S}^{d-1}$ .

1206 **Proposition 4** (Discretization bound). *With probability at least  $1 - p_{\eta, \mathcal{K}_1, \mathcal{K}_2, \mathcal{K}_3}$ , where*

$$p_{\eta, \mathcal{K}_1, \mathcal{K}_2, \mathcal{K}_3} = \frac{\mathcal{K}_2 d T \eta^2}{b} + \exp\left(-\frac{b^2}{2(\beta_{d,\ell}^2 + \mathcal{K}_2 d^2 \eta^2) d \eta^2 T + 2b d^{1/2} \eta (\beta_{d,\ell} + \eta d^{3/2})}\right) + \mathcal{K}_3 T d^{1/2} \eta^3 + \sqrt{\mathcal{K}_1 \mathcal{K}_2} T \eta^2 d^{-1},$$

1207 where we have

$$\begin{aligned} \mathcal{K}_1 &= K \ell \left(\frac{4e}{\ell}\right)^{\ell/2} \log(\|\mathcal{T}_\ell\|_4^2)^{\ell/2}, \\ \mathcal{K}_2 &= 4K \ell \left(\frac{4e}{4\ell}\right)^{4\ell/2} \|\mathcal{T}\|_4^4 \log\left(\frac{\|\mathcal{T}_\ell\|_8^2}{\|\mathcal{T}\|_4^4}\right)^{4\ell/2}, \\ \mathcal{K}_3 &= 2K \left(\frac{4e}{\ell}\right)^{\ell/2} \log(\|\mathcal{T}_\ell\|_4^2)^{\ell/2}. \end{aligned}$$

1208 We then have

$$m_T \geq \frac{m_0}{2} + \eta \beta_{\ell,d} \frac{\ell \cdot (\ell + d - 2)}{d - 1} \sum_{t=0}^{T-1} (1 - m_t^2) m_t^{\ell-1}.$$

1209 Conditioned on the event  $\{T \leq \tau_{1/2}^+ \wedge \tau_{2s^*/\sqrt{d}}^-\}$ , we have the following inequality

$$m_T \geq \frac{s^*}{\sqrt{d}} + \eta \beta_{\ell,d} \frac{\ell \cdot (\ell + d - 2)}{(d - 1) 2^{\ell+1}} \sum_{t=0}^{T-1} m_t^{\ell-1}.$$

1210 **Sample complexity for weak recovery** We are interested in the weak recovery setting i.e we want to  
 1211 bound  $\tau_{1/2}$ . We work under the event  $\{T \leq \tau_{1/2}^+ \wedge \tau_{2s^*/\sqrt{d}}^-\}$ , we then can apply the same analysis as  
 1212 in [49]. We choose  $\eta = c_\ell \beta_{\ell,d} d^{-\ell/2}$ , we then have

$$\eta \tau_{1/2}^+ \leq \frac{2d^{\ell/2-1}}{\beta_{\ell,d} \frac{\ell \cdot (\ell + d - 2)}{(d - 1) 2^{\ell+1}}}.$$

1213 Rearranging this, it gives us

$$\tau_{1/2}^+ \leq \frac{2d^{\ell-1}}{\beta_{\ell,d}^2 c_\ell \frac{\ell \cdot (\ell + d - 2)}{(d - 1) 2^{\ell+1}}} \leq \frac{2d^{\ell-1}}{\beta_{\ell,d}^2} \cdot \left(c_\ell \frac{\ell \cdot (\ell + d - 2)}{(d - 1) 2^{\ell+1}}\right)^{-1}.$$

1214

□

## 1215 E.1 Proof of Lemma 10

1216 *Proof.* We remind that we have  $\mathcal{T}_\ell$  which is normalized and we also have the expansion

$$\mathbb{E}[\mathcal{T}_\ell(y, r)|\mathbf{z}] = \sum_{i=0}^{+\infty} \beta_{d,i} Q_i(\langle \mathbf{w}_*, \mathbf{z} \rangle). \quad (61)$$

1217 Consider the population mean-squared loss (we can also directly use the correlation loss)

$$\mathcal{L}(\mathbf{w}) = \mathbb{E}_{(y,r,\mathbf{z})} \left[ \left( \mathcal{T}_\ell(y, r) - Q_\ell^{(d)}(\langle \mathbf{w}, \mathbf{z} \rangle) \right)^2 \right] = 2 - 2\beta_{d,\ell} \mathbb{E} \left[ \mathcal{T}_\ell(y, r) Q_\ell^{(d)}(\langle \mathbf{w}, \mathbf{z} \rangle) \right].$$

1218 Using the above decomposition (61), and orthogonality of spherical harmonics

$$\mathcal{L}(\mathbf{w}) = 2 - 2\beta_{d,\ell} \mathbb{E}[Q_\ell^{(d)}(\langle \mathbf{w}_*, \mathbf{z} \rangle) Q_\ell^{(d)}(\langle \mathbf{w}, \mathbf{z} \rangle)].$$

1219 Using the identity (33), we then have

$$\mathcal{L}(\mathbf{w}) = 2 - 2 \frac{\beta_{d,\ell}}{\sqrt{n_{\ell,d}}} Q_\ell^{(d)}(\langle \mathbf{w}_*, \mathbf{w} \rangle).$$

1220 Let denote  $m := \langle \mathbf{w}_*, \mathbf{w} \rangle$ , we can rewrite the loss in term of the overlap parameter. We now want to  
1221 compute the spherical gradient of the population loss

$$\langle \nabla_{\mathbf{w}}^{\mathbb{S}^{d-1}} \mathcal{L}(\mathbf{w}), \mathbf{w}^* \rangle = -(1 - m^2) \ell'(m) = -2(1 - m^2) \frac{\beta_{d,\ell}}{\sqrt{n_{d,\ell}}} Q_\ell^{(d)}(\langle \mathbf{w}_*, \mathbf{w} \rangle)'$$

1222 We can use the representation of the derivative of Gegenbauer i.e  $Q_\ell^{(d)}(\mathbf{z})' = \frac{\ell(\ell+d-2)\sqrt{n_{d,\ell}}}{(d-1)\sqrt{n_{d+2,\ell-1}}} Q_{\ell-1}^{d+2}(\mathbf{z})$

1223 ([49] Fact C.3). So, the loss can be written as

$$\langle \nabla_{\mathbf{w}}^{\mathbb{S}^{d-1}} \mathcal{L}(\mathbf{w}), \mathbf{w}^* \rangle = -(1 - m^2) \ell'(m) = -2(1 - m^2) \frac{\beta_{d,\ell} \ell(\ell + d - 2)}{(d - 1) \sqrt{n_{d+2,\ell-1}}} Q_{\ell-1}^{(d+2)}(\langle \mathbf{w}_*, \mathbf{w} \rangle).$$

1224 We can use the facts C.4 and C.5 from [49] (note that the Gegenbauer polynomials in [49] is  
1225 normalized such that  $P_\ell^{(d)}(1) = 1$ , meanwhile we consider  $Q_\ell^{(d)}(1) = \sqrt{B(d, \ell)}$ ) to state that

$$\forall m \geq 2\sqrt{\frac{s^*}{d}}, \quad \langle \nabla_{\mathbf{w}}^{\mathbb{S}^{d-1}} \mathcal{L}(\mathbf{w}), \mathbf{w}_* \rangle \leq -2(1 - m^2) \beta_{d,\ell} \frac{\ell^*(\ell^* + d - 2)}{d - 1} \langle \mathbf{w}, \mathbf{w}_* \rangle^{\ell^*-1}, \quad (62)$$

1226 where  $s^* = \sqrt{\frac{(\ell-2)(\ell+d-3)}{(\ell-d/2-3)(\ell+d/2-2)}} \cos(\pi/\ell)$ . □

## 1227 E.2 Proof of Proposition 4

1228 *Proof.* In the following, we denote  $r_t = \|\mathbf{w}_t - \eta \nabla_{\mathbf{w}}^{\mathbb{S}^{d-1}} L(\mathbf{w}_t; \mathbf{z}_t, y_t)\|$  and the martingale part  
1229  $\mathbf{M}_t = L(\mathbf{w}_t; \mathbf{z}_t, y_t) - \mathbb{E}[L(\mathbf{w}_t; \mathbf{z}_t, y_t)]$ . We have the recursion

$$m_{t+1} = \frac{1}{r_t} \left( m_t - \eta \langle \nabla_{\mathbf{w}}^{\mathbb{S}^{d-1}} \mathcal{L}(\mathbf{w}_t), \mathbf{w}_* \rangle - \eta \langle \nabla_{\mathbf{w}}^{\mathbb{S}^{d-1}} \mathbf{M}_t, \mathbf{w}^* \rangle \right). \quad (63)$$

1230 The strategy of the proof is to use the results from [49]. The proofs of these lemmas are classical  
1231 bounds of martingale relying on some assumptions on the moments of the gradients. Notice here  
1232 that  $C$  is no longer a constant and extra care of the analysis is necessary for the proof of Lemma [49,  
1233 Lemma B.4]. To prove the lemmas [49, Lemmas B.2, B.3, B.4], we need to prove the bounds on the  
1234 growth of gradients norms of [49, Lemma B.8]. We check this

$$\begin{aligned} \mathbb{E}_{(y,r,\mathbf{z})} [\|\nabla_{\mathbf{w}}^{\mathbb{S}^{d-1}} (L(\mathbf{w}_t; \mathbf{z}_t, r_t, y_t))\|^2] &= \mathbb{E}_{(y,r,\mathbf{z})} [\|\mathbf{P}_{\mathbf{w}_t}(\mathbf{z}_t) (Q_{\ell^*}^{(d)})'(\langle \mathbf{w}, \mathbf{z}_t \rangle) \mathcal{T}(y, r)\|^2] \\ &\leq \mathbb{E}_{(y,r,\mathbf{z})} \left[ \left| (Q_{\ell^*}^{(d)})'(\langle \mathbf{w}, \mathbf{z}_t \rangle) \mathcal{T}(y, r) \right|^2 \right] \\ &\leq C(d)^2 \mathbb{E} \left[ \left| Q_{\ell^*-1}^{(d-2)}(\langle \mathbf{w}, \mathbf{z} \rangle) \right|^2 \mathcal{T}(y, r)^2 \right] \\ &\leq d\ell \left( \frac{4e}{\ell} \right)^{\ell/2} \mathbb{E} [\mathcal{T}(y, r)^2] \log(1/\mathbb{E} [\mathcal{T}(y, r)])^{\ell/2} \\ &\leq Kd\ell \left( \frac{4e}{\ell} \right)^{\ell/2} \log(\|\mathcal{T}\|_4^2)^{\ell/2} \\ &\leq d\mathcal{K}_1. \end{aligned}$$

where we have used Lemma 27, the identity and the hypercontractivity and Jensen inequality in the last line.

$$\begin{aligned}
\mathbb{E}_{(y,r,z)}[\|\nabla_{\mathbf{w}}^{\mathbb{S}^{d-1}}(L(\mathbf{w}_t; \mathbf{z}_t, r_t, y_t))\|^4] &= \mathbb{E}_{(y,r,z)}[\|\mathbf{P}_{\mathbf{w}_t}(\mathbf{z}_t)(Q_{\ell^*}^{(d)})'(\langle \mathbf{w}, \mathbf{z}_t \rangle) \mathcal{T}_{\ell}(y, r)\|^4] \\
&\leq \mathbb{E}_{(y,r,z)}\left[\left|(Q_{\ell^*}^{(d)})'(\langle \mathbf{w}, \mathbf{z}_t \rangle) \mathcal{T}_{\ell}(y, r)\right|^4\right] \\
&\leq C(d)^4 \mathbb{E}\left[\left|Q_{\ell^*-1}^{(d-2)}(\langle \mathbf{w}, \mathbf{z} \rangle)\right|^4 |\mathcal{T}_{\ell}(y, r)|^4\right] \\
&\leq 4C(d)^4 \ell \left(\frac{4e}{4\ell}\right)^{4\ell/2} \|\mathcal{T}_{\ell}\|_4^4 \log\left(\frac{\|\mathcal{T}_{\ell}\|_8^2}{\|\mathcal{T}_{\ell}\|_4^4}\right)^{4\ell/2} \\
&\leq d^2 4K\ell \left(\frac{4e}{4\ell}\right)^{4\ell/2} \|\mathcal{T}_{\ell}\|_4^4 \log\left(\frac{\|\mathcal{T}_{\ell}\|_8^2}{\|\mathcal{T}_{\ell}\|_4^4}\right)^{4\ell/2} \\
&\leq d^2 \mathcal{K}_2.
\end{aligned}$$

We have  $\mathbf{M}(\mathbf{w}_t; \mathbf{z}_t, r_t, y_t) = \ell(\mathbf{w}_t; \mathbf{z}_t, r_t, y_t) - \mathbb{E}[\ell(\mathbf{w}_t; \mathbf{z}_t, r_t, y_t)]$ , hence

$$\begin{aligned}
\langle \nabla_{\mathbf{w}}^{\mathbb{S}^{d-1}} \mathbf{M}(\mathbf{w}_t; \mathbf{z}_t, r_t, y_t), \mathbf{w}_* \rangle &= \langle \nabla_{\mathbf{w}}^{\mathbb{S}^{d-1}}(L(\mathbf{w}_t; \mathbf{z}_t, r_t, y_t), \mathbf{w}_*) - \mathbb{E}[\langle \nabla_{\mathbf{w}}^{\mathbb{S}^{d-1}}(L(\mathbf{w}_t; \mathbf{z}_t, r_t, y_t), \mathbf{w}_*)] \\
&\quad - \langle \mathbf{w}, \nabla_{\mathbf{w}}^{\mathbb{S}^{d-1}}(L(\mathbf{w}_t; \mathbf{z}_t, r_t, y_t)) \mathbf{m} + \mathbb{E}[m \langle \mathbf{w}, \nabla_{\mathbf{w}}^{\mathbb{S}^{d-1}}(L(\mathbf{w}_t; \mathbf{z}_t, r_t, y_t)) \rangle].
\end{aligned}$$

We then have

$$\begin{aligned}
&\mathbb{E}_{(y,r,z)}[\langle \nabla_{\mathbf{w}}^{\mathbb{S}^{d-1}}(\mathbf{M}(\mathbf{w}_t; \mathbf{z}_t, r_t, y_t), \mathbf{w}_*)^2] \\
&\leq 2\text{Var}_{(y,r,z)}(\nabla_{\mathbf{w}}^{\mathbb{S}^{d-1}}(L(\mathbf{w}_t; \mathbf{z}_t, r_t, y_t), \mathbf{w}_*)) + 2\text{Var}_{(y,r,z)}(\langle \mathbf{w}, \nabla_{\mathbf{w}}^{\mathbb{S}^{d-1}}(L(\mathbf{w}_t; \mathbf{z}_t, r_t, y_t)) \mathbf{m}) \\
&\leq 2\mathbb{E}[\langle \mathbf{z}_t, \mathbf{w}_* \rangle^2 (Q_{\ell^*}^{(d)})'(\langle \mathbf{w}, \mathbf{z}_t \rangle)^2 \mathcal{T}_{\ell}(y, r)^2] + 2\mathbb{E}[\langle \mathbf{z}_t, \mathbf{w}_* \rangle^2 (Q_{\ell^*}^{(d)})'(\langle \mathbf{w}, \mathbf{z}_t \rangle)^2 \mathcal{T}_{\ell}(y, r)^2] \\
&\leq 2K \left(\frac{4e}{\ell}\right)^{\ell/2} \log(\|\mathcal{T}_{\ell}\|_4^2)^{\ell/2} := \mathcal{K}_3,
\end{aligned}$$

where we have used the inequality  $(a+b)^2 \leq 2(a^2 + b^2)$ , hypercontractivity of Gegenbauer polynomials.

Conditioned on the event  $\{T \leq \tau_{2s^*/\sqrt{d}}^-\}$ , and using the inequality (62), we have

$$m_{t+1} \geq \frac{1}{r_t} \left( m_t + 2\eta(1 - m_t^2) \beta_{\ell,d} \frac{\ell \cdot (\ell^* + d - 2)}{d - 1} m_t^{\ell-1} - \eta \langle \nabla^{\mathbb{S}^{d-1}} \mathbf{M}_t, \mathbf{w}^* \rangle \right).$$

Using the following bound on  $r_t$ , which is for all  $t \in \mathbb{N}$ , we have

$$1/r_t \geq 1 - \eta^2 \|\nabla_{\mathbf{w}_t} L(\mathbf{w}_t; y_t, r_t, \mathbf{z}_t)\|^2,$$

and plugging this into previous inequality, we have

$$m_{t+1} \geq m_t + 2\eta(1 - m_t^2) \beta_{\ell^*,d} \frac{\ell^* \cdot (\ell^* + d - 2)}{d - 1} m_t^{\ell^*-1} - \eta \langle \nabla^{\mathbb{S}^{d-1}} \mathbf{M}_t, \mathbf{w}^* \rangle - \eta^2 |m_t| \|\nabla_{\mathbf{w}_t} L(\mathbf{w}_t; y_t, r_t, \mathbf{z}_t)\|^2 - \eta^3 \xi_T, \quad (64)$$

where  $\xi_T = \|\nabla_{\mathbf{w}} L(\mathbf{w}_T; y_T, r_T, \mathbf{z}_T)\|^2 \cdot |\langle \nabla_{\mathbf{w}} L(\mathbf{w}_T; y_T, r_T, \mathbf{z}_T), \mathbf{w}^* \rangle|^2$ .

We use [49, Lemma B.3] to state that with probability at least  $1 - \frac{\mathcal{K}_3 t \eta^2}{\lambda^2}$ , we have for all  $\lambda > 0$ ,

$$\sup_{t \leq T} \eta \left| \sum_{k=0}^{t-1} \langle \nabla^{\mathbb{S}^{d-1}} \mathbf{M}_k, \mathbf{w}^* \rangle \right| \leq \lambda. \quad (65)$$

We employ [49, Lemma B.6] to state that for all  $\lambda > 0$ , with probability at least  $1 - \frac{\sqrt{\mathcal{K}_1 \mathcal{K}_2 T d \eta^3}}{\lambda}$ , we have

$$\sup_{t \leq T} \eta^3 \sum_{k=0}^{t-1} \xi_k \leq \lambda. \quad (66)$$

1248 We sum the equation 64 to obtain

$$m_T \geq m_0 + 2\eta \frac{\beta_{\ell,d} \ell \cdot (\ell + d - 2)}{d - 1} \sum_{t=0}^{T-1} (1 - m_t^2) m_t^{\ell-1} - \eta \sum_{t=0}^{T-1} \langle \nabla^{\mathbb{S}^{d-1}} \mathbf{M}_t, \mathbf{w}^* \rangle \\ - \eta^2 \sum_{t=0}^{T-1} |m_t| \|\nabla_{\mathbf{w}_t} L(\mathbf{w}_t; y_t, r_t, \mathbf{z}_t)\|^2 - \sum_{t=0}^{T-1} \eta^3 \xi_T,$$

1249 We then use (65),(66) and plug it into (64), and use  $\lambda = b/\sqrt{d}$ , to state that with probability at least  
1250  $1 - \mathcal{K}_3 T d^{1/2} \eta^3 - \sqrt{\mathcal{K}_1 \mathcal{K}_2 T} \eta^2 d^{-1}$ , we have

$$m_T \geq \frac{7m_0}{10} + 2\eta \frac{\beta_{\ell,d} \ell \cdot (\ell + d - 2)}{d - 1} \sum_{t=0}^{T-1} (1 - m_t^2) m_t^{\ell-1} - \eta^2 \sum_{t=0}^{T-1} |m_t| \|\nabla_{\mathbf{w}_t} L(\mathbf{w}_t; y_t, r_t, \mathbf{z}_t)\|^2. \quad (67)$$

1251 We now bound the term coming from the projection step in inequality (67). We adapt the proof to  
1252 take account the dependency on  $\|\mathcal{T}_\ell\|_2$ .

1253 **Lemma 11.** *For all  $\lambda > 0$ , if for all  $t \leq T$ ,  $m_t \in [2b/\sqrt{d}, 1/2]$ , and  $\eta \leq \frac{c\|\xi_{d,\ell^*}\|_2}{d}$ , with probability  
1254 at least  $1 - \frac{\mathcal{K}_2 T d^{1/2} \eta^2}{\lambda} - \exp\left(-\frac{\lambda^2}{2(\beta_{\ell,d}^2 + \mathcal{K}_2 d^2 \eta^2) \eta^2 T + 2\lambda \eta (\beta_{\ell,d} + \eta d^{3/2})}\right)$ , we have*

$$\eta^2 \sum_{t=0}^{T-1} |m_t| \|\nabla_{\mathbf{w}_t} L(\mathbf{w}_t; y_t, r_t, \mathbf{z}_t)\|^2 + \eta \sum_{t=0}^{T-1} (1 - m_t^2) \beta_{d,\ell} \frac{\ell \cdot (\ell + d - 2)}{d - 1} m_t^{\ell-1} \leq 2\lambda.$$

1255 *Proof.* The proof is a slight adaptation of [49, Lemma B.4,B.5]. An adaptation of the proof of Lemma  
1256 B.4 gives us the following. For all  $\lambda > 0$ , if for all  $t \leq T$ ,  $m_t \in [2b/\sqrt{d}, 1/2]$ , and  $\eta > 0$ , we have

$$\mathbb{P}(\eta \sum_{t=0}^{T-1} D_t \leq -\lambda) \leq \exp\left(-\frac{\lambda^2}{2(\beta_{\ell,d}^2 + \mathcal{K}_2 d^2 \eta^2) \eta^2 T + 2\lambda \eta (\beta_{\ell,d} + \eta d^{3/2})}\right).$$

1257 Besides, the adaptation of Lemma B.5 gives us

$$\mathbb{P}\left(\sup_{t \leq T} \eta^2 \sum_{t=0}^{T-1} |m_t| \|\nabla_{\mathbf{w}_t} L\|^2 \mathbf{1}_{\|\nabla_{\mathbf{w}_t} L\| > d^{3/2}} \geq \lambda\right) \leq \frac{\mathcal{K}_2 T d^{1/2} \eta^2}{\lambda}.$$

1258 Combining the two inequalities, we end up the desired claim.  $\square$

1259 We then use  $\lambda = b/\sqrt{d}$ , and we obtain that with probability at least  $1 - p_{\eta, \mathcal{K}_1, \mathcal{K}_2, \mathcal{K}_3}$  where

$$p_{\eta, \mathcal{K}_1, \mathcal{K}_2, \mathcal{K}_3} \\ = \frac{\mathcal{K}_2 d T \eta^2}{b} + \exp\left(-\frac{b^2}{2(\beta_{k,d}^2 + \mathcal{K}_2 d^2 \eta^2) \eta^2 d T + 2b d^{1/2} \eta (\beta_{k,d} + \eta d^{3/2})}\right) + \mathcal{K}_3 T d^{1/2} \eta^3 + \sqrt{\mathcal{K}_1 \mathcal{K}_2 T} \eta^2 d^{-1},$$

1260 we have

$$m_T \geq \frac{m_0}{2} + \beta_{\ell,d} \frac{\ell \cdot (\ell + d - 2)}{d - 1} \eta \sum_{t=0}^{T-1} (1 - m_t^2) m_t^{\ell-1}.$$

1261 Conditioned on the event  $\{T \leq \tau_{1/2}^+ \wedge \tau_{2s^*/\sqrt{d}}^-\}$ , we have the following inequality

$$m_T \geq \frac{s^*}{\sqrt{d}} + \eta \beta_{\ell,d} \frac{\ell \cdot (\ell + d - 2)}{(d - 1) 2^{\ell+1}} \sum_{t=0}^{T-1} m_t^{\ell-1}.$$

1262  $\square$

## F Harmonic tensor unfolding

In this section, we present the analysis of the harmonic tensor unfolding which corresponds to theorem 2[Part 3]. As in the two previous sections, we will implement the algorithm on  $\mathcal{T}_\ell$  for  $\ell > 2$ .

**Assumption 6.** For  $\nu_d \in \mathfrak{L}_d$  and  $\ell \geq 1$ , there exist  $\mathcal{T}_\ell : \mathcal{Y} \times \mathbb{R}_{\geq 0} \rightarrow \mathbb{R}$  and  $\kappa_\ell > 1$  such that  $\|\mathcal{T}_\ell\|_{L^2} = 1$ ,  $\|\mathcal{T}_\ell\|_\infty \leq \kappa_\ell$  and  $\mathbb{E}[\mathcal{T}_\ell(y, r)Q_\ell(\langle \mathbf{w}, \mathbf{z} \rangle)] = \beta_{d,\ell} > 0$ .

We remind some notations for tensors. Let  $\mathbf{A}, \mathbf{B} \in (\mathbb{R}^d)^{\otimes \ell}$ , we define the inner-product

$$\langle \mathbf{A}, \mathbf{B} \rangle = \sum_{i_1, \dots, i_\ell} \mathbf{A}_{i_1, \dots, i_\ell} \mathbf{B}_{i_1, \dots, i_\ell}.$$

We call the tensor  $\mathbf{X}$  symmetric if, for any permutation  $\pi \in \mathfrak{S}_\ell$ ,  $\mathbf{X}^\pi = \mathbf{X}$ . We also denote the unfolded matrix of the tensor  $\mathbf{T} \in (\mathbb{R}^d)^{\otimes 2\ell}$  as  $\mathbf{Mat}_q(\mathbf{T}) \in \mathbb{R}^{d^q} \times \mathbb{R}^{d^{\ell-q}}$  with coefficients given by

$$(\mathbf{Mat}(\mathbf{T})_q)_{(i_1, \dots, i_q), (j_1, \dots, j_{\ell-q})} = \mathbf{T}_{i_1, \dots, i_\ell, j_1, \dots, j_\ell},$$

where we identify  $(i_1, \dots, i_q)$  with  $1 + \sum_{k=1}^q (i_k - 1)d^{k-1}$ , and  $(j_1, \dots, j_{\ell-q})$  with  $1 + \sum_{k=1}^{\ell-q} (j_k - 1)d^{k-1}$ . In the following, we will drop the dependency on  $q$  since the unfolding parameter will be made clear. We now present the Harmonic tensor unfolding. The main difference with the spherical tensor unfolding is that the Harmonic tensor is the projection of the tensor  $\mathbf{z}^{\otimes \ell}$  into the space of traceless symmetric tensor, and it allows to decouple the different harmonic subspaces and it yields a simpler analysis. In the following two subsections, we will work under the following assumption

We define the Harmonic tensors.

**Definition 2** (Harmonic Tensors). For every  $k > 0$ , we define  $\mathcal{H}_k \in \text{Sym}((\mathbb{R}^d)^{\otimes k})$  the unique symmetric tensor such that for all  $\mathbf{w} \in \mathbb{S}^{d-1}$ , and for all  $\mathbf{z} \in \mathbb{S}^{d-1}$ , we have

$$Q_k^{(d)}(\langle \mathbf{z}, \mathbf{w} \rangle) = \langle \mathcal{H}_k(\mathbf{z}), \mathbf{w}^{\otimes k} \rangle. \quad (68)$$

*Proof of uniqueness of Zonal tensor.* Let  $T, T'$  two symmetric tensors that satisfy the identity 68. Consider the Warring decomposition of  $T - T'$  i.e there exists  $K > 0$ , and  $\mathbf{v}_1, \dots, \mathbf{v}_K \in \mathbb{S}^{d-1}$  such that

$$T - T' = \sum_{i=1}^K \alpha_i \mathbf{v}_i^{\otimes k}.$$

Using that for all  $\mathbf{w} \in \mathbb{S}^{d-1}$ ,  $\langle \mathbf{w}^{\otimes k}, T - T' \rangle = 0$ , we have

$$\begin{aligned} \|T - T'\|^2 &= \sum_i \alpha_i \langle T - T', \mathbf{v}_i^{\otimes k} \rangle \\ &= 0. \end{aligned}$$

We then conclude that  $T = T'$ , and it proves the uniqueness.  $\square$

The uniqueness property is due to the fact that the tensor is defined to be symmetric.

**Remark F.1.** These tensors seem to appear in physics litterature as Harmonic tensors. Besides another interpretation of these tensors, is that it can be seen as the projection into the space of symmetric, trace-less tensors of the tensor  $\mathbf{z}^{\otimes \ell}$ .

These tensor satisfy a Reproducing property Eq.72. We state here some properties of the Harmonic Tensors. The algorithm of harmonic tensor unfolding uses the harmonic tensors defined above, and unfold it. Given enough samples, the unfold matrix has a left-singular value that has good alignment with the feature vector  $\mathbf{w}^{\otimes \ell}$ . We then compute the vectorization. We show that the vectorization does not hurt the alignment of the signal.

We can now state our result on tensor unfolding recovery.

**Theorem 6** (Tensor unfolding). *Let  $\hat{\mathbf{v}}_1$  denote the the top right singular vector of  $\hat{\mathbf{M}}_n$ . Under Assumption 6, there exists a constant  $\mathcal{C}_\ell$ , such that for any  $\delta > 0$  with probability at least  $1 - \delta$ , and for*

$$n \geq \frac{\kappa_\ell d^{\ell/2} \ell \log(2d/\delta)}{\|\xi_{d,\ell}\|_2 \varepsilon} \vee \frac{\mathcal{C}_\ell \kappa_\ell^2 d^{\ell/2} k \log(2d/\delta)}{\|\xi_{d,\ell}\|_2^2 \varepsilon^2},$$

we have

$$\langle \mathbf{w}, \hat{\mathbf{v}} \rangle \geq 1 - \varepsilon. \quad (69)$$

In particular, in view of the boosting lemma, it is sufficient to consider  $\varepsilon = 1/2$ , and we end up with the following sample complexity

$$n \geq \frac{\kappa_\ell d^{\ell/2} \ell \log(2d/\delta)}{\|\xi_{d,\ell}\|_2} \vee \frac{\mathcal{C}_\ell \kappa_\ell^2 d^{\ell/2} k \log(2d/\delta)}{\|\xi_{d,\ell}\|_2^2}.$$

It proves the part about harmonic tensor in the theorem.

The rest of section is devoted to the proof of this result. We first prove some results on Harmonic tensors, then we focus on even and odd cases.

### F.1 Preliminaries on Harmonic tensors.

**Lemma 12.** *We have the following properties:*

- $\mathcal{H}_k$  has the following expression

$$\mathcal{H}_k(\mathbf{z}) = \sum_{j=0}^{\lfloor k/2 \rfloor} c_{k,j} \text{Sym} \left( \mathbf{z}^{\otimes k-2j} \otimes \mathbf{I}_d^{\otimes j} \right), \quad (70)$$

where  $c_{k,j} = (-1)^k \frac{\Gamma(k-j+d/2-1)2^{k-2j}}{\Gamma(d/2-1)k!(n-2k)!} \frac{\sqrt{B(d,k)}}{Q(1)} \simeq d^{k/2-j}$ .

- Let  $O \in \mathcal{O}(d)$ , we then have

$$\mathcal{H}_k(O\mathbf{z}) = O^{\otimes k} \mathcal{H}_k(\mathbf{z}).$$

*Proof.* We decompose the Gegenbauer polynomials into monomials

$$Q_k^{(d)}(\langle \mathbf{z}, \mathbf{w} \rangle) = \sum_{j=0}^{\lfloor k/2 \rfloor} c_{k,j} \langle \mathbf{w}, \mathbf{z} \rangle^{k-2j},$$

where we have that

$$c_{k,j} = (-1)^k \frac{\Gamma(k-j+d/2-1)2^{k-2j}}{\Gamma(d/2-1)k!(n-2k)!} \frac{\sqrt{B(d,k)}}{Q(1)} \simeq d^{k/2-j}.$$

Besides, we have

$$\begin{aligned} \left\langle \mathbf{w}^{\otimes k}, \left( \mathbf{z}^{\otimes(k-2j)} \otimes \mathbf{I}_d^{\otimes j} \right) \right\rangle &= \sum_{i_1, \dots, i_k} \mathbf{w}_{i_1} \dots \mathbf{w}_{i_k} \mathbf{z}_{i_1} \dots \mathbf{z}_{i_{k-2j}} \delta_{i_{k-2j+1}, k-2j+2} \dots \delta_{i_{k-1}, k} \\ &= \prod_{j=1}^{k-2j} \sum_j \mathbf{w}_{i_j} \mathbf{z}_{i_j} \prod_{j=1}^{k-2j} \sum_j \mathbf{w}_{i_j} \mathbf{w}_{i_j} \\ &= \langle \mathbf{w}, \mathbf{z} \rangle^{k-2j} \|\mathbf{w}\|^j. \end{aligned}$$

So, we end up with the claimed identity. For the second identity, we use the fact that

$$Q_k(\langle O\mathbf{w}, \mathbf{z} \rangle) = \langle \mathcal{H}(\mathbf{z}), (O\mathbf{w})^{\otimes k} \rangle = \langle O^{\otimes k} \mathcal{H}(\mathbf{z}), \mathbf{w}^{\otimes k} \rangle,$$

and

$$Q_k(\langle \mathbf{w}, O\mathbf{z} \rangle) = \langle \mathcal{H}(O\mathbf{z}), \mathbf{w}^{\otimes k} \rangle,$$

we can identify the two elements.  $\square$

1312 We remind the zonal property of Gegenbauer polynomials

1313 **Lemma 13** (Zonal property of Gegenbauer ([12])). *Let  $f \in L^2(\mathbb{S}^{d-1})$ . Consider the projection  $P_{V_k}$*   
 1314 *of  $f$  into the spherical harmonics of degree  $k$  denoted  $V_k$ , this projection can be written as*

$$P_{V_k} f(\mathbf{x}) = \sqrt{n_{d,k}} \cdot \mathbb{E}_{\mathbf{z}}[f(\mathbf{z}) Q_k^{(d)}(\langle \mathbf{z}, \mathbf{x} \rangle)]. \quad (71)$$

1315 *Proof.* We have the following identity 32 for Gegenbauer polynomials, for all  $\mathbf{x}, \mathbf{z} \in \mathbb{S}^{d-1}$ ,

$$Q_k(\langle \mathbf{z}, \mathbf{x} \rangle) = \frac{1}{\sqrt{n_{d,k}}} \sum_{i=1}^{n_{d,k}} Y_{k,i}(\mathbf{z}) Y_{k,i}(\mathbf{x}).$$

1316 We then have that

$$\mathbb{E}_{\mathbf{z}}[Q_k(\langle \mathbf{z}, \mathbf{x} \rangle) f(\mathbf{z})] = \frac{1}{\sqrt{n_{d,k}}} \sum_{i=1}^{n_{d,k}} \langle Y_{k,i}, f \rangle Y_{k,i}(\mathbf{x}) = \frac{P_{V_k} f}{\sqrt{n_{d,k}}}.$$

1317 □

1318 **Definition 3** (Reproducing Property of Tensor). *Consider the following operator  $M_f : L^2(\mathbb{S}^{d-1}) \rightarrow$*   
 1319  *$\text{Sym}(\mathbb{R}^d)^{\otimes k}$  which is defined as the unique element such that*

$$P_{V_k} f(\mathbf{x}) = \langle \mathbf{x}^{\otimes k}, M_k(f) \rangle. \quad (72)$$

1320 The unicity comes from the same reasoning as Definition 1.

1321 **Lemma 14.** *Let  $\ell \in \mathbb{N}$ , and  $k \in \mathbb{N}$ , we have the following identity*

$$\mathbb{E}_{\mathbf{z} \in \mathbb{S}^{d-1}} \left[ Q_\ell^{(d)}(\langle \mathbf{z}, \mathbf{w} \rangle) \mathcal{H}_k(\mathbf{z}) \right] = 1_{\ell=k} \frac{\mathcal{H}_k(\mathbf{w})}{\sqrt{n_{d,k}}}. \quad (73)$$

1322 *Proof.* We have the following form for the Reproducing property

$$M_k(f) = \sqrt{n_{d,k}} \cdot \mathbb{E}_{\mathbf{z}}[f(\mathbf{z}) \mathcal{H}_k(\mathbf{z})].$$

1323 Using Zonal property of Gegenbauer polynomials (71), we have

$$\begin{aligned} P_{V_k} f(\mathbf{x}) &= \sqrt{n_{d,k}} \int_{\mathbb{S}^{d-1}} f(\mathbf{z}) Q_k^{(d)}(\langle \mathbf{z}, \mathbf{x} \rangle) d\sigma_{d-1}(\mathbf{z}) \\ &= \sqrt{n_{d,k}} \int_{\mathbb{S}^{d-1}} f(\mathbf{z}) \langle \mathbf{x}^{\otimes k}, \mathcal{H}_k(\mathbf{z}) \rangle d\sigma_{d-1}(\mathbf{z}) \\ &= \langle \mathbf{x}^{\otimes k}, \sqrt{n_{d,k}} \int_{\mathbb{S}^{d-1}} f(\mathbf{z}) \mathcal{H}_k(\mathbf{z}) d\sigma_{d-1}(\mathbf{z}) \rangle. \end{aligned}$$

1324 We then use the fact that the uniqueness to identify the two tensors, and so we have that

$$M_k(f) = \sqrt{n_{d,k}} \int_{\mathbb{S}^{d-1}} f(\mathbf{z}) \mathcal{H}_k(\mathbf{z}) d\sigma_{d-1}(\mathbf{z}).$$

1325 We have

$$1_{\ell=k} Q_k(\langle \mathbf{w}^*, \mathbf{z} \rangle) = P_{V_\ell} Q_k(\langle \mathbf{w}^*, \mathbf{z} \rangle) = \langle \mathbf{x}^{\otimes \ell}, M_\ell(Q_k(\langle \mathbf{w}^*, \cdot \rangle)) \rangle.$$

1326 Using uniqueness of the linear form, we have if  $\ell \neq k$ ,

$$M_\ell(Q_k(\langle \mathbf{w}^*, \cdot \rangle)) = 0.$$

1327 If  $\ell = k$ , we have

$$M_k(Q_k(\langle \mathbf{w}^*, \cdot \rangle)) = \mathcal{H}_k(\mathbf{w}^*).$$

1328 Using the above equality and the fact above, we have that

$$\begin{aligned} \sqrt{n_{d,k}} \mathbb{E}_{\mathbf{z}}[Q_k^{(d)}(\langle \mathbf{z}, \mathbf{w} \rangle) \mathcal{H}_k(\mathbf{z})] &= M_k(\mathbf{z} \rightarrow Q_k(\langle \mathbf{w}^*, \mathbf{z} \rangle)) \\ &= \mathcal{H}_k(\mathbf{w}). \end{aligned}$$

1329 We then conclude the following

$$\mathbb{E}_{\mathbf{z}}[Q_k^{(d)}(\langle \mathbf{z}, \mathbf{w} \rangle) \mathcal{H}_k(\mathbf{z})] = \frac{\mathcal{H}_k(\mathbf{w})}{\sqrt{n_{d,k}}}.$$

1330 □

1331 Denote  $M_n$  the unfolded matrix  $\mathbf{Mat}(\frac{1}{n} \sum_{i=1}^n \mathcal{T}_k(y_i, r_i) \mathcal{H}_k(\mathbf{w}))$  obtained from tensor  $\mathcal{H}_k$ , and we  
 1332 denote  $M := \mathbb{E}[M_n]$ .

1333 **Proposition 5.** *Let  $k \geq 2$ . There exists a constant  $K$  only depending on  $\mathcal{C}$  such that*

$$\|M - c_{k,0} \mathbf{w}^{\otimes m} (\mathbf{w}^{\otimes m})^\top\|_{\text{op}} \leq \mathcal{C} d^{k/2-1/2}. \quad (74)$$

1334 *Proof.* We use the following Lemma

1335 **Lemma 15** (Lemma 4.13 from [46]). *Let  $\mathcal{T} \in (\mathbb{R}^d)^{\otimes k}$  be an  $k$ -order tensor with same dimension,*  
 1336 *we then have*

$$\|\mathbf{Mat}(\mathcal{T})\|_{\text{op}} \leq \|\mathcal{T}\|_F. \quad (75)$$

1337 We then compute the Frobenius norm of the tensor  $\mathcal{H}_k(\mathbf{w}) - c_{k,0} \mathbf{w}^{\otimes k}$

$$\begin{aligned} \|\mathcal{H}_k(\mathbf{w}) - c_{k,0} \mathbf{w}^{\otimes k}\|_F &= \left\| \sum_{\ell=0}^{\lfloor m/2 \rfloor} c_{k,\ell} \text{Sym}(\mathbf{w}^{\otimes(k-2\ell)} \otimes \mathbf{I}_d^{\otimes \ell}) - c_{k,0} \mathbf{w}^{\otimes k} \right\|_F \\ &= \left\| \sum_{\ell=1}^{\lfloor m/2 \rfloor} c_{k,\ell} \text{Sym}(\mathbf{w}^{\otimes(k-2\ell)} \otimes \mathbf{I}_d^{\otimes \ell}) \right\|_F \\ &\leq \sum_{\ell=1}^{\lfloor m/2 \rfloor} c_{k,\ell} \left\| \text{Sym}(\mathbf{w}^{\otimes(k-2\ell)} \otimes \mathbf{I}_d^{\otimes \ell}) \right\|_F \\ &\leq \sum_{\ell=1}^{\lfloor m/2 \rfloor} c_{k,\ell} \|\mathbf{w}\|^{k-2\ell} \|\mathbf{I}_d\|_F^\ell \\ &\leq \sum_{\ell=1}^{\lfloor m/2 \rfloor} c_{k,\ell} d^{\ell/2} \leq \mathcal{C} d^{k/2-1/2}, \end{aligned}$$

1338 where we have used that  $\|AB\|_F \leq \|A\|_F \cdot \|B\|_F$ ,  $\|\text{Sym}A\|_F \leq \|A\|_F$ . Using the fact that  $\mathbf{Mat}$  is  
 1339 linear, and  $\mathbf{Mat}(\mathbf{w}^{\otimes k}) = \mathbf{w}^{\otimes k/2} (\mathbf{w}^{\otimes k/2})^\top$ , we end up with

$$\mathbf{Mat}(\mathcal{H}_k(\mathbf{w}) - c_{k,0} \mathbf{w}^{\otimes k}) = M - c_{k,0} \mathbf{w}^{\otimes k/2} (\mathbf{w}^{\otimes k/2})^\top.$$

1340 Using inequality 75 from Lemma 15, we have

$$\|M - c_{k,0} \mathbf{w}^{\otimes k/2} (\mathbf{w}^{\otimes k/2})^\top\|_{\text{op}} \leq \mathcal{C} d^{k/2-1/2}.$$

1341 □

## 1342 F.2 Proof of Theorem 6 for even case.

1343 This subsection is devoted to the study of the matrix unfolding algorithm in the even case. In all  
 1344 the section, we consider  $\ell = 2m$ . In the following, we will denote  $\hat{T}_\ell \in (\mathbb{R}^d)^{\otimes \ell}$  the tensor of the  
 1345 algorithm, and we denote  $M_n \in \mathbb{R}^{d^m \times d^m}$  the unfolded matrix. We begin with the following lemma  
 1346 about the expectation of the unfold matrix.

1347 **Lemma 16.** *We have the identity*

$$\mathbb{E}[\mathcal{T}_\ell(y, r) \mathcal{H}_\ell(z)] = \frac{\beta_{d,\ell} \mathcal{H}_\ell(\mathbf{w})}{\sqrt{n_{d,\ell}}}. \quad (76)$$

1348 *Proof of 16.* We first decompose  $\mathbb{E}[\mathcal{T}_\ell(y, r)|z]$  into Gegenbauer basis i.e

$$\mathbb{E}[\mathcal{T}_\ell(y, r)|z] = \sum_{i=0}^{+\infty} \beta_{d,i} Q_i(\langle \mathbf{w}, z \rangle).$$

1349 We then have the following identity

$$\mathbb{E}[\mathcal{T}_\ell(y, r) \mathcal{H}_\ell(z)] = \sum_{i=0}^{+\infty} \beta_{d,i} \mathbb{E}[Q_i(\langle \mathbf{w}, z \rangle) \mathcal{H}_\ell(z)] = \frac{\beta_{d,\ell} \mathcal{H}_\ell(\mathbf{w})}{\sqrt{n_{d,\ell}}}.$$

1350 Using the proposition we have

$$\mathbb{E}[\mathcal{T}_\ell(y, r)\mathcal{H}_\ell(\mathbf{z})] = \mathcal{C}_{\ell\beta_{d,\ell}}\mathbf{w}^{\otimes \ell} + \mathbf{W},$$

1351 where  $\|\mathbf{W}\|_F = o(d^{-1/2})$ . □

1352 Combining the equation (76) and proposition 5, we have that the largest eigenvalue is given by  $c_{\ell,0}$   
 1353 and associated to the eigenvector  $\mathbf{w}_*^{\otimes m}$ . We now control the fluctuations of the unfold matrix. Define  
 1354  $\mathbf{W}_i = \mathbf{Mat}(\mathcal{T}_\ell(y_i, r_i)\mathcal{H}_\ell(\mathbf{z}_i))$ .

1355 **Lemma 17.** *Let  $\delta > 0$ . With probability at least  $1 - \delta$ , the following inequality holds*

$$\left\| \frac{1}{n} \sum_{i=1}^n \mathbf{W}_i - \mathbb{E}[\mathbf{W}] \right\|_{\text{op}} \leq \frac{\kappa_\ell d^m}{3n} \ell \log \left( \frac{2d}{\delta} \right) + \sqrt{\frac{4\mathcal{C}_\ell \kappa_\ell^2 d^m \ell \log(\frac{2d}{\delta})}{n}}. \quad (77)$$

1356 With these two results, we can prove the theorem 6.

1357 *Proof of theorem 6 for even case.* Combining the lemma 16 and lemma 17, and the Davis-Kahan  
 1358 theorem, we have with probability at least  $1 - \delta$ , we have

$$\langle \hat{\mathbf{w}}, \mathbf{w}_* \rangle^2 \geq 1 - \left( \frac{\frac{\kappa_\ell d^m}{3n} \ell \log \left( \frac{2d}{\delta} \right) + \sqrt{\frac{4\mathcal{C}_\ell \kappa_\ell^2 d^m \ell \log(\frac{2d}{\delta})}{n}}}{\beta_{d,\ell}} \right)^2.$$

1359 Taking  $n \geq \frac{\kappa_\ell d^m \ell \log(2d/\delta)}{\|\xi_{d,\ell}\|_{2\varepsilon}} \vee 4 \frac{\mathcal{C}_\ell \kappa_\ell^2 d^m \ell \log(2d/\delta)}{\|\xi_{d,\ell}\|_{2\varepsilon}^2}$ , we have the desired result. □

1360 We now prove the Lemma 17

1361 *Proof of Lemma 17.* Denote  $\mathbf{Z}_i = \mathcal{T}_\ell(y_i, r_i)\mathbf{Mat}(\mathcal{H}_\ell(\mathbf{z}_i))$ . We bound the variance of  $\mathbf{M}_n =$   
 1362  $\frac{1}{n} \sum_{i=1}^n \mathbf{Z}_i$

$$\begin{aligned} \sigma^2 &= \left\| \mathbb{E} \left[ \mathbf{M}_n \mathbf{M}_n^\top \right] \right\|_{\text{op}} \\ &= \frac{1}{n^2} \left\| \mathbb{E} \left[ \sum_{k=1}^n (\mathbf{Z}_k - \mathbb{E}[\mathbf{Z}_k]) \sum_{\ell=1}^n (\mathbf{Z}_\ell - \mathbb{E}[\mathbf{Z}_\ell])^\top \right] \right\|_{\text{op}} \\ &\leq \frac{1}{n} \left\| \mathbb{E}[(\mathbf{Z} - \mathbb{E}[\mathbf{Z}])(\mathbf{Z} - \mathbb{E}[\mathbf{Z}])^\top] \right\|_{\text{op}} \\ &\leq \frac{1}{n} \left\| \mathbb{E}[\mathbf{Z} \mathbf{Z}^\top] \right\|_{\text{op}} \\ &\leq \frac{1}{n} \sup_{\mathbf{x} \in \mathbb{S}^{d^m-1}} \mathbb{E}[\mathcal{T}_\ell(\mathbf{y}, \mathbf{r})^2 \mathbf{x} \mathbf{Mat}(\mathcal{H}_\ell(\mathbf{z})) \mathbf{Mat}(\mathcal{H}_\ell(\mathbf{z}))^\top \mathbf{x}]. \\ &\leq \frac{\|\mathcal{T}_\ell\|_\infty^2}{n} \left\| \mathbb{E}[\mathbf{Mat}(\mathcal{H}_\ell(\mathbf{z})) \mathbf{Mat}(\mathcal{H}_\ell(\mathbf{z}))^\top] \right\|_{\text{op}}. \end{aligned}$$

1363 We bound the last term in the following. We then have

$$\mathbf{Mat}(\mathcal{H}_\ell)\mathbf{Mat}(\mathcal{H}_\ell)^\top = \text{Cont}(\mathcal{H}_\ell(\mathbf{z}) \otimes \mathcal{H}_\ell(\mathbf{z})),$$

1364 where the contraction operation is defined as

$$\text{Cont}(\mathbf{T}_1 \otimes \mathbf{T}_2)_{(i_1, \dots, i_m), (j_1, \dots, j_m)} = \sum_{\ell_1, \dots, \ell_m} (\mathbf{T}_1)_{i_1, \dots, i_m, \ell_1, \dots, \ell_m} (\mathbf{T}_2)_{\ell_1, \dots, \ell_m, j_1, \dots, j_m}.$$

1365 **Lemma 18.** *There exists an universal constant  $\mathcal{C}_\ell$  that only depend on  $\ell$  such that we have*

$$\left\| \mathbb{E}[\text{Cont}(\mathcal{H}_\ell(\mathbf{z}) \otimes \mathcal{H}_\ell(\mathbf{z}))] \right\|_{\text{op}} \leq \mathcal{C}_\ell d^m.$$

1366 Using the lemma 18, we bound  $\sigma^2$

$$\sigma^2 \leq \frac{\mathcal{C}_\ell \kappa_\ell^2 d^m}{n}.$$

1367 We bound the operator norm almsot surely for all  $i \in \{1, \dots, n\}$  by the following

$$\|\mathcal{T}_\ell(y, r) \mathbf{Mat}(\mathcal{H}_\ell(z)) - \mathbb{E}[\mathcal{T}_\ell(y, r) \mathbf{Mat}(\mathcal{H}_\ell(z))]\|_{\text{op}} \leq \frac{\kappa_\ell d^m}{n}.$$

1368 Using Berstein inequality for matrices, with probability at least  $1 - \delta$ , we have

$$\left\| \frac{1}{n} \sum_{k=1}^n \mathbf{X}_\ell - \mathbb{E}[\mathbf{X}] \right\|_{\text{op}} \leq \frac{\kappa_\ell d^m}{3n} \ell \log \left( \frac{2d}{\delta} \right) + \sqrt{\frac{4\mathcal{C}_\ell \kappa_k^2 d^m \ell \log \left( \frac{2d}{\delta} \right)}{n}}.$$

1369 This is the desired result. □

1370 *Proof of Claim 18.* We have

$$\begin{aligned} \mathbb{E}[\mathcal{H}_\ell(z) \otimes \mathcal{H}_\ell(z)] &= \sum_{q=0}^{\lfloor \ell/2 \rfloor} c_{\ell,q} \mathbb{E} \left[ \mathcal{H}_\ell(z) \otimes \text{Sym}(z^{\otimes(\ell-2q)} \otimes \mathbf{I}_d^{\otimes q}) \right] \\ &= c_{\ell,0} \mathbb{E} [\mathcal{H}_\ell(z) \otimes z^\ell], \end{aligned}$$

1371 where we used that for all  $(i_1, \dots, i_\ell)$ , we have  $\text{Sym}(z^{\otimes(\ell-2i)} \otimes \mathbf{I}_d^{\otimes i})_{i_1, \dots, i_\ell} \in V_{\ell-2\ell}$ , and so we  
1372 deduce  $\mathbb{E}[\mathcal{H}_\ell(z) \text{Sym}(z^{\otimes(\ell-2i)} \otimes \mathbf{I}_d^{\otimes i})_{i_1, \dots, i_\ell}] = 0$ , which implies that for all  $i < \ell$ , we have

$$\mathbb{E}[\mathcal{H}_\ell(z) \otimes \text{Sym}(z^{\otimes(\ell-2i)} \otimes \mathbf{I}_d^{\otimes i})] = 0.$$

1373 By definition of the Harmonic tensor,

$$\mathbb{E}[\mathcal{H}_\ell(z) \otimes \mathcal{H}_\ell(z)] = c_{\ell,0} \sum_{q=0}^{\lfloor \ell/2 \rfloor} c_{\ell,q} \mathbb{E} [\text{Sym}(z^{\otimes(\ell-2q)} \otimes \mathbf{I}_d^{\otimes q}) \otimes z^\ell].$$

1374 We state the Wick formula for spherical measure.

1375 **Lemma 19** (Wick formula). *Let  $z$  be a uniform vector on  $\mathbb{S}^{d-1}$ , we then have*

$$\mathbb{E}_z \left[ \prod_{j=1}^{\ell} z_{k_j} \right] = \frac{1_{\ell \equiv 0[2]}}{d(d+2) \cdots (d+2\ell-2)} \sum_{P \in P_\ell^2(\{k_1, \dots, k_\ell\})} \prod_{\{r,s\}} \delta_{k_r, k_s}, \quad (78)$$

1376 where  $P_\ell^2(\{k_1, \dots, k_\ell\})$  denotes the set of pairings of the set  $\{k_1, \dots, k_\ell\}$ .

1377 By Wick formula (19),

$$\begin{aligned} &\mathbb{E} \left[ \text{Sym}(z^{\otimes(\ell-2q)} \otimes \mathbf{I}_d^{\otimes q}) \otimes z^{\otimes \ell} \right]_{(i_1, \dots, i_\ell), (j_1, \dots, j_\ell)} \\ &= \sum_{\sigma \in \mathfrak{S}_\ell} \frac{1}{\ell!} \prod_{k=1}^q \delta_{i_{\sigma(\ell-2q+2k-1)}, i_{\sigma(\ell-2q+2k)}} \mathbb{E} \left[ \prod_{k=1}^{\ell-2q} z_{i_{\sigma(k)}} \prod_{k=1}^{\ell} z_{j_k} \right] \\ &= \frac{1}{\ell! 2^q d \cdots (d+2(\ell-1-q))} \sum_{\sigma \in \mathfrak{S}_\ell} \prod_{k=1}^q \delta_{i_{\sigma(\ell-2q+2k-1)}, i_{\sigma(\ell-2q+2k)}} \sum_{P \in P_{2(\ell-q)}^2(i_{\sigma(\leq \ell-2q)}, j)} \prod_{\{r,s\}} \delta_{\gamma_r, \gamma_s} \\ &\simeq \frac{\mathcal{C}_\ell d^{-\ell+q}}{\ell!} \sum_{\sigma \in \mathfrak{S}_\ell} \prod_{k=1}^q \delta_{i_{\sigma(\ell-2q+2k-1)}, i_{\sigma(\ell-2q+2k)}} \sum_{P \in P_{2(\ell-q)}^2(i_{\sigma(\leq \ell-2q)}, j)} \prod_{\{r,s\}} \delta_{\gamma_r, \gamma_s}, \end{aligned}$$

1378 where  $\gamma$  is an enumeration of the set  $\{i_{\sigma(1)}, \dots, i_{\sigma(\ell-2q)}, j_1, \dots, j_\ell\}$ . Let focus on  
1379  $\mathbb{E}[\text{Cont}(\mathcal{H}_\ell(z) \otimes \mathcal{H}_\ell(z))]_{(i_1, \dots, i_m), (j_1, \dots, j_m)}$ . By linearity, we only need to compute it for

$$1380 \quad \text{Sym}(\mathbf{z}^{\otimes(\ell-2q)} \otimes \mathbf{I}_d^{\otimes q}) \otimes \mathbf{z}^\ell,$$

$$\begin{aligned} & \mathbb{E} \left[ \text{Cont}(\text{Sym}(\mathbf{z}^{\otimes(\ell-2q)} \otimes \mathbf{I}_d^{\otimes q}) \otimes \mathbf{z}^\ell) \right]_{(i_1, \dots, i_m), (j_1, \dots, j_m)} \\ &= \sum_{k_1, \dots, k_m} \mathbb{E}[\text{Sym}(\mathbf{z}^{\otimes(\ell-2q)} \otimes \mathbf{I}_d^{\otimes q}) \otimes \mathbf{z}^\ell]_{(i_1, \dots, i_m, k_1, \dots, k_m), (j_1, \dots, j_m, k_1, \dots, k_m)} \\ &= C_\ell d^{-\ell+q} \sum_{k_1, \dots, k_m} \sum_{\sigma \in \mathfrak{S}_\ell} \prod_{k=1}^q \delta_{i_{\sigma(\ell-2q+2k-1)}, i_{\sigma(\ell-2q+2k)}} \sum_{P \in P_{2(\ell-q)}^2(i_{\sigma(\leq \ell-2q)}, j)} \prod_{\{r, s\}} \delta_{k_r, k_s} \\ &= C_\ell d^{-\ell+q} \sum_{k_1, \dots, k_m} \sum_{\sigma \in \mathfrak{S}_\ell} \sum_{P \in P_{2(\ell-q)}^2(i_{\sigma(\leq \ell-2q)}, j)} \prod_{\{r, s\}} \delta_{\gamma_r, \gamma_s} \prod_{k=1}^q \delta_{i_{\sigma(\ell-2q+2k-1)}, i_{\sigma(\ell-2q+2k)}} \\ &= C_\ell d^{-\ell+q} \sum_{\sigma \in \mathfrak{S}_\ell} \sum_{P \in P_{2(\ell-q)}^2(i_{\sigma(\leq \ell-2q)}, j)} \sum_{k_1, \dots, k_m} \prod_{\{r, s\}} \delta_{\gamma_r, \gamma_s} \prod_{k=1}^q \delta_{i_{\sigma(\ell-2q+2k-1)}, i_{\sigma(\ell-2q+2k)}}. \end{aligned}$$

1381 Consider the matrix  $\mathbf{M}_{P, \sigma} \in \mathbb{R}^{d^m \times d^m}$  with coefficients given by

$$(\mathbf{M}_{P, \sigma})_{(i_1, \dots, i_m), (j_1, \dots, j_m)} = \sum_{k_1, \dots, k_m} \prod_{k=1}^q \delta_{i_{\sigma(\ell-2q+k)}, i_{\sigma(\ell-2q+k+1)}} \prod_{\{r, s\}} \delta_{\gamma_r, \gamma_s}.$$

1382 The rest of the analysis is devoted to bound the operator norm of these matrices, In the following,  
 1383 we denote  $\mathbf{M}_P := \mathbf{M}_{P, id}$ . Fix  $P \in P_{2(\ell-q)}^2$ , and let assume  $\sigma = id$  without losing any generality.  
 1384 Denote  $\mathcal{L} := \{i \in \{i_1, \dots, i_m, j_1, \dots, j_m\} : \exists k_q \text{ paired with } i\}$  i.e the set of indices which are paired  
 1385 with a term  $\{k_i\}_{i=1, \dots, m}$ , and also denote  $n_P = |\{k_i : \exists k \text{ such that } k_i \text{ is paired with } k_k\}|$ . We then  
 1386 have

$$\begin{aligned} (\mathbf{M}_P)_{(i_1, \dots, i_m), (j_1, \dots, j_m)} &= \prod_{i \in n_P} \left( \sum_{k_1, k_2} \delta_{k_1, k_2} \right) \prod_{i \in \mathcal{L}} \left( \sum_{k_i} \delta_{k_i, i} \right) \prod_{k=1: \ell \notin \mathcal{L}}^q \delta_{i_{k-2q+\ell}, i_{k-2q+k+1}} \prod_{\{r, s\} \in P: r, s \notin \mathcal{L}} \delta_{\gamma_r, \gamma_s} \\ &= d^{|n_P|} \prod_{k=1: \ell \notin \mathcal{L}}^q \delta_{i_{k-2q+k}, i_{k-2q+k+1}} \prod_{\{r, s\} \in P: r, s \notin \mathcal{L}} \delta_{\gamma_r, \gamma_s}. \end{aligned}$$

1387 We now prove the following inequality. Suppose we have a matrix  $\mathbf{M} \in \mathbb{R}^{d^m \times d^m}$  with coefficients  
 1388 given by

$$\mathbf{M}_{(i_1, \dots, i_m), (j_1, \dots, j_m)} = \prod_{i=1}^r \delta_{c_{2i}, c_{2i+1}},$$

1389 where  $c_i$  is a set of  $2r$  different indices of  $\{i_1, \dots, i_m, j_1, \dots, j_m\}$ . We then have the following

$$\begin{aligned} \|\mathbf{M}\|_{\text{op}} &\leq \|\mathbf{M}\|_F \\ &\leq \sqrt{\sum_{k_1, k_2} M_{k_1, k_2}^2} \\ &\leq d^{m-r/2}. \end{aligned}$$

1390 We then have the following inequality

$$\|\mathbf{M}\|_{\text{op}} \leq d^{m-r/2}.$$

1391 Applying this fact to  $\mathbf{M}_P$ , which has exactly  $2\ell - 2n_P - |\mathcal{L}|$  kronecker, we then have

$$\|\mathbf{M}_P\|_{\text{op}} \leq d^{m+2n_P-\ell+|\mathcal{L}|/2}.$$

1392 Using the fact that  $2m = 2n_P + |\mathcal{L}|$ , we then deduce that

$$\|\mathbf{M}_P\|_{\text{op}} \leq d^{2m+n_P-\ell} \leq d^{n_P} \leq d^m.$$

1393 This reasoning hold true for all the matrices  $\mathbf{M}_P$ , we then have by triangular inequality

$$c_{\ell, 0} C_{\ell, q} \left\| \mathbb{E} \left[ \text{Cont}(\text{Sym}(\mathbf{z}^{\otimes(\ell-2q)} \otimes \mathbf{I}_d^{\otimes q}) \otimes \mathbf{z}^\ell) \right] \right\|_{\text{op}} \leq C_\ell d^m,$$

1394 with  $\mathcal{C}_\ell$  which is still a universal constant. We now bound the operator norm of  $\text{Cont}(\mathcal{H}_\ell(\mathbf{z}) \otimes \mathcal{H}_\ell(\mathbf{z}))$ ,  
 1395 using the triangular inequality, we have the following

$$\begin{aligned} & \|\mathbb{E}[\text{Cont}(\mathcal{H}_\ell(\mathbf{z}) \otimes \mathcal{H}_\ell(\mathbf{z}))]\|_{\text{op}} \\ & \leq c_{\ell,0} \sum_q^{\lfloor k/2 \rfloor} c_{k,q} \left\| \mathbb{E} \left[ \text{Cont}(\text{Sym}(\mathbf{z}^{\otimes(\ell-2q)} \otimes \mathbf{I}_d^{\otimes q}) \otimes \mathbf{z}^\ell) \right] \right\|_{\text{op}} \\ & \leq \mathcal{C}_\ell d^m. \end{aligned}$$

1396

□

1397 We can adapt the proof to the case where  $\mathcal{T}_\ell$  satisfies the weaker assumption using similar ideas of  
 1398 the analysis of Section . We are not giving details of this adaptation in this appendix.

### 1399 E.3 Proof of Proposition 6 for odd case.

1400 Here we focus on  $\ell = 2k + 1$ . In the following, we denote  $\mathbf{M}_n =$   
 1401  $\frac{1}{n} \sum_{i=1}^n \mathcal{T}_{2k+1}(y_i, r_i) \mathbf{Mat}(\mathcal{H}_{2k+1}(\mathbf{z}_i)) \in \mathbb{R}^{d^k \times d^{k+1}}$ , and consider the matrix  $\mathbf{T}_n = \mathbf{M}_n \mathbf{M}_n^\top \in$   
 1402  $\mathbb{R}^{d^k \times d^k}$ , and the matrix  $\mathbf{M} = \mathbb{E}[\mathbf{M}_n]$ ,

1403 *Proof of Proposition 6 for odd case.* We first state some lemmas needed for the proof. We follow the  
 1404 idea of [26] and we decompose the matrix of interest into different parts

$$\mathbf{T}_n = \mathbf{M} \mathbf{M}^\top + \mathbf{M}(\mathbf{M}_n - \mathbf{M})^\top + (\mathbf{M}_n - \mathbf{M}) \mathbf{M}^\top + (\mathbf{M}_n - \mathbf{M})(\mathbf{M}_n - \mathbf{M})^\top. \quad (79)$$

1405 The next lemmas bound the norm of matrices in the above equation.

1406 **Lemma 20.** *Let  $n \geq 0$ , with probability at least  $1 - \delta$ , we have*

$$\left\| (\mathbf{M}_n - \mathbf{M})(\mathbf{M}_n - \mathbf{M})^\top - \frac{1}{n} \mathbb{E} [\mathcal{T}_k(y, r)^2 \mathbf{Mat}(\mathcal{H}_k(\mathbf{z})) \mathbf{Mat}(\mathcal{H}_k(\mathbf{z}))^\top] \right\|_{\text{op}} \leq \sigma_1 \vee \sigma_2, \quad (80)$$

1407 where we introduced  $\sigma_1$  and  $\sigma_2$  defined as

$$\sigma_1 \leq \frac{\kappa_k^2 d^{2k+1} \log(d/\delta)}{n^2} + \sqrt{\frac{\mathcal{C}_k \kappa_k^4 d^{2k+1}}{n^2} + \frac{\mathcal{C}_k \kappa_k^4 d^{3k+1} \log(d/\delta)}{n^3}}, \quad (81)$$

1408 and

$$\sigma_2 \leq \frac{\kappa_k^2 d^{2k+1}}{3n^2} k \log\left(\frac{2d}{\delta}\right) + \sqrt{\frac{4\mathcal{C}_k \kappa_k^2 d^{2k+1} k \log(\frac{2d}{\delta})}{n^2}}. \quad (82)$$

1409 **Lemma 21.** *Let  $n \geq 0$ , with probability at least  $1 - \delta$ , we have*

$$\|(\mathbf{M}_n - \mathbf{M}) \mathbf{M}^\top\|_{\text{op}} \leq \frac{\mathcal{C}_{2k+1} d^k \|\mathcal{T}_{2k+1}\|_\infty^2}{n} + \mathcal{C}_{2k+1} \sqrt{\frac{d^{2k}}{n^2} \log(C/\delta)^k}. \quad (83)$$

1410 We also compute the expectation of the unfolded matrix.

1411 **Lemma 22.** *Denote  $\mathbf{v}_1 \in \mathbb{R}^d$  the singular values associated to the largest left singular values  $\lambda_1$ , we*  
 1412 *then have*

$$\mathbf{v}_1 = \mathbf{w}_*^{\otimes 2k+1}, \quad \lambda_1 \simeq \mathcal{C}_k \beta_{d,k}^2.$$

1413 With the lemmas in hands, we can prove the desired result. Let apply the argument by [26]. Denote  
 1414  $\mathbf{u} \in \mathbb{R}^{d^k}$  the top eigenvector of  $\mathbf{T}_n$ , which is also the top eigenvector of  $\mathbf{M}_n := \mathbf{T}_n \mathbf{T}_n^\top - c \mathbf{I}_{d^k}$ . We  
 1415 have with probability at least  $1 - 4\delta$ ,

$$\begin{aligned} \mathbf{u}^\top \mathbf{T}_n \mathbf{u} &= \mathbf{u}^\top \left( \mathbf{M} \mathbf{M}^\top + \mathbf{M}(\mathbf{M}_n - \mathbf{M})^\top + (\mathbf{M}_n - \mathbf{M}) \mathbf{M}^\top + (\mathbf{M}_n - \mathbf{M})(\mathbf{M}_n - \mathbf{M})^\top \right) \mathbf{u} \\ &= \langle \mathbf{u}, \mathbf{M} \mathbf{M}^\top \mathbf{u} \rangle + \mathbf{u}^\top \left( \mathbf{M}(\mathbf{M}_n - \mathbf{M})^\top + (\mathbf{M}_n - \mathbf{M}) \mathbf{M}^\top + (\mathbf{M}_n - \mathbf{M})(\mathbf{M}_n - \mathbf{M})^\top \right) \mathbf{u} \\ &\leq \beta_{d,k}^2 \langle \mathbf{w}^{\otimes k}, \mathbf{u} \rangle + 2\sigma_3 + \sigma_1 \vee \sigma_2 + \mathbf{u}^\top \frac{1}{n} \left( \mathbb{E}[\mathbf{X} \mathbf{X}^\top] - \mathbb{E}[\mathbf{X}] \mathbb{E}[\mathbf{X}]^\top \right) \mathbf{u} \end{aligned}$$

1416 We then notice that for  $n \geq \frac{Cd^{k/2} \log^2(d)}{\delta \|\xi_{d,i}\|_2^2 \sqrt{\varepsilon}}$ , we have that

$$\sigma_1 \leq \frac{\kappa_k^2 d^{2k+1} \log(d/\delta)}{n^2} + \sqrt{\frac{C_k \kappa_k^4 d^{2k+1}}{n^2} + \frac{C_k \kappa_k^4 d^{3k+1} \log(d/\delta)}{n^3}} \leq C_k \beta_{d,k}^2 \varepsilon,$$

1417 and we also have

$$\sigma_2 \leq \frac{\kappa_k^2 d^{2k+1}}{3n^2} k \log\left(\frac{2d}{\delta}\right) + \sqrt{\frac{4C_k \kappa_k^2 d^{2k+1} k \log(\frac{2d}{\delta})}{n^2}} \leq C_k \beta_{d,k}^2 \varepsilon.$$

1418 So, we deduce that

$$\sigma_2 \vee \sigma_1 \leq C_k \beta_{d,k}^2 \varepsilon.$$

1419 We also have the following bound

$$\sigma_3 \leq \frac{C_{2k+1} d^k \|\mathcal{T}_{2k+1}\|_\infty^2}{n} + C_{2k+1} \sqrt{\frac{d^{2k}}{n^2} \log(C/\delta)^k} \leq C_{2k+1} \beta_{d,k}^2 \varepsilon.$$

1420 Combining the bounds, we then have

$$\mathbf{u}^\top \mathbf{T}_n \mathbf{u} \leq \beta_{d,k}^2 \langle \mathbf{w}^{\otimes k}, \mathbf{u} \rangle + C_{2k+1} \beta_{d,k}^2 \varepsilon$$

1421 We also use that  $\frac{1}{n} (\mathbb{E}[\mathbf{X} \mathbf{X}^\top] - \mathbb{E}[\mathbf{X}] \mathbb{E}[\mathbf{X}]^\top)$  can be decomposed into three different parts; one

1422 part aligned with  $\mathbf{w}^{\otimes k}$ , a diagonal part  $c\mathbf{I}_{d^k}$  and  $\mathbf{W} \in \mathbb{R}^{d^k \times d^k}$ , and we have that  $\|\mathbf{W}\|_{\text{op}} \leq \frac{d^{k+1/2}}{n}$ .

1423 Using Courant-Fisher theorem, we have

$$\mathbf{u}^\top \mathbf{T}_n \mathbf{u} \geq (\mathbf{w}^{\otimes k})^\top \mathbf{T}_n (\mathbf{w}^{\otimes k}) \geq \lambda^2 - O(\varepsilon \lambda^2).$$

1424 So we end up with

$$\langle \mathbf{w}^{\otimes k}, \mathbf{u} \rangle \geq 1 - O(\varepsilon).$$

1425

□

#### 1426 F.4 Proof of the lemmas.

1427 We now provide proofs of the lemmas (20).

1428 *Proof of Lemma 20.* For the sake of clarity, in the following we denote the matrix  $\mathbf{X}_i :=$

1429  $\mathcal{T}(\mathbf{y}_i, \mathbf{r}_i) \text{Mat}(\mathcal{H}_\ell(\mathbf{z}_i))$ , and denote  $\mathbf{Y}_i = \mathbf{X}_i - \mathbb{E}[\mathbf{X}_i]$ . We notice that the matrix  $(\mathbf{M}_n - \mathbf{M})(\mathbf{M}_n -$

1430  $\mathbf{M})^\top$  is a  $U$ -statistic

$$(\mathbf{M}_n - \mathbf{M})(\mathbf{M}_n - \mathbf{M})^\top = \frac{1}{n^2} \sum_{1 \leq i, j \leq n} (\mathbf{X}_i - \mathbb{E}[\mathbf{X}_i])(\mathbf{X}_j - \mathbb{E}[\mathbf{X}_j])^\top. \quad (84)$$

1431 We decompose this sum as

$$\frac{1}{n^2} \sum_{i=1}^n (\mathbf{X}_i - \mathbb{E}[\mathbf{X}_i])(\mathbf{X}_i - \mathbb{E}[\mathbf{X}_i])^\top + \frac{1}{n^2} \sum_{1 \leq i \neq j \leq n} (\mathbf{X}_i - \mathbb{E}[\mathbf{X}_i])(\mathbf{X}_j - \mathbb{E}[\mathbf{X}_j])^\top. \quad (85)$$

1432 We now have the two lemmas.

1433 **Lemma 23.** *With probability at least  $1 - 2\delta$ , we have*

$$\left\| \frac{1}{n^2} \sum_{i=1}^n \mathbf{Y}_i \mathbf{Y}_i^\top - \frac{1}{n} (\mathbb{E}[\mathbf{X} \mathbf{X}^\top] - \mathbb{E}[\mathbf{X}] \mathbb{E}[\mathbf{X}]^\top) \right\|_{\text{op}} \leq \sigma_1, \quad (86)$$

1434 where  $\sigma_1 = \frac{\kappa_k^2 d^{2k+1} \log(d/\delta)}{n^2} + \sqrt{\frac{C_k \kappa_k^4 d^{2k+1}}{n^2} + \frac{C_k \kappa_k^4 d^{3k+1} \log(d/\delta)}{n^3}}$ , and

$$\left\| \frac{1}{n^2} \sum_{1 \leq i \neq j \leq n} (\mathbf{X}_i - \mathbb{E}[\mathbf{X}_i])(\mathbf{X}_j - \mathbb{E}[\mathbf{X}_j])^\top \right\|_{\text{op}} \leq \sigma_2, \quad (87)$$

1435 where  $\sigma_2 = \frac{\kappa_k^2 d^{2k+1}}{3n^2} k \log\left(\frac{2d}{\delta}\right) + \sqrt{\frac{4C_k \kappa_k^2 d^{2k+1} k \log(\frac{2d}{\delta})}{n^2}}$ .

1436 Using the two bounds (86) and (87), with probability at least  $1 - 2\delta$ , we have

$$\left\| (M_n - M)(M_n - M)^\top - \frac{1}{n} \mathbb{E} [\mathcal{T}(y, r)^2 \mathbf{Mat}(\mathcal{H}_\ell(z)) \mathbf{Mat}(\mathcal{H}_\ell(z))^\top] \right\|_{\text{op}} \leq \sigma_1 \vee \sigma_2. \quad (88)$$

1437

□

1438 *Proof of Lemma 23.* Let bound the matrix variance statistics of the sum

$$\begin{aligned} \sigma^2 &= \sup_{\mathbf{x}} \frac{1}{n^4} \mathbb{E} \left[ \mathbf{x}^\top \sum_{i,j}^n \mathbf{Y}_i \mathbf{Y}_i^\top \mathbf{Y}_j \mathbf{Y}_j^\top \right] \mathbf{x} \\ &= \sup_{\mathbf{x}} \frac{1}{n^3} \mathbb{E} \left[ \mathbf{x}^\top \mathbf{Y} \mathbf{Y}^\top \mathbf{Y} \mathbf{Y}^\top \right] \mathbf{x} + \frac{1}{n^2} \mathbb{E} \left[ \mathbf{x}^\top \mathbf{Y}_1 \mathbf{Y}_1^\top \mathbf{Y}_2 \mathbf{Y}_2^\top \right] \mathbf{x} \\ &= \sup_{\mathbf{x}} \frac{1}{n^3} \mathbb{E} \left[ \mathbf{x}^\top \mathbf{Y} \mathbf{Y}^\top \mathbf{Y} \mathbf{Y}^\top \right] \mathbf{x} + \frac{1}{n^2} \mathbf{x}^\top \mathbb{E} \left[ \mathbf{Y} \mathbf{Y}^\top \right] \mathbb{E} \left[ \mathbf{Y} \mathbf{Y}^\top \right] \mathbf{x} \end{aligned}$$

1439 We expand this and we end up bounding the following quantities

$$\begin{aligned} &\mathbb{E} [\mathcal{T}(\mathbf{y}, \mathbf{r})^4 \mathbf{x}^\top \mathbf{Mat}(\mathcal{H}_{2k+1}(z)) \mathbf{Mat}(\mathcal{H}_{2k+1}(z))^\top \mathbf{Mat}(\mathcal{H}_{2k+1}(z)) \mathbf{Mat}(\mathcal{H}_{2k+1}(z))^\top \mathbf{x}] \\ &\leq \|\mathcal{T}\|_\infty^4 \sup_{\mathbf{x}} \mathbb{E} [\mathbf{x}^\top \mathbf{Mat}(\mathcal{H}_{2k+1}(z)) \mathbf{Mat}(\mathcal{H}_{2k+1}(z))^\top \mathbf{Mat}(\mathcal{H}_{2k+1}(z)) \mathbf{Mat}(\mathcal{H}_{2k+1}(z))^\top \mathbf{x}]. \end{aligned}$$

1440 **Lemma 24.** We have the following bound

$$\|\mathbb{E} [\mathbf{Mat}(\mathcal{H}_{2k+1}(z)) \mathbf{Mat}(\mathcal{H}_{2k+1}(z))^\top \mathbf{Mat}(\mathcal{H}_{2k+1}(z)) \mathbf{Mat}(\mathcal{H}_{2k+1}(z))^\top]\|_{\text{op}} \leq C_k d^{3k+3/2}.$$

1441 So, we obtain the following bound

$$\frac{1}{n^3} \mathbb{E} \left[ \mathbf{x}^\top \mathbf{Y} \mathbf{Y}^\top \mathbf{Y} \mathbf{Y}^\top \right] \mathbf{x} \leq \frac{C_k \|\mathcal{T}_\ell\|_\infty^4 d^{3k+3/2}}{n^3}.$$

1442 For the other term, using the same reasoning we have

$$\frac{1}{n^2} \mathbf{x}^\top \mathbb{E} \left[ \mathbf{Y} \mathbf{Y}^\top \right] \mathbb{E} \left[ \mathbf{Y} \mathbf{Y}^\top \right] \mathbf{x} \leq \frac{C_k \|\mathcal{T}_\ell\|_\infty^4 d^{2k+1}}{n^2}$$

1443 We then have the following bound on the matrix variance statistic

$$\sigma^2 \leq \frac{C_k \|\mathcal{T}_\ell\|_\infty^4 d^{2k+1}}{n^2} + \frac{C_k \|\mathcal{T}_\ell\|_\infty^4 d^{3k+3/2}}{n^3}.$$

1444 Let now bound the operator norm almost surely for all  $i \in \{1, \dots, n\}$

$$\left\| \frac{1}{n^2} \mathbf{Y}_i \mathbf{Y}_i^\top \right\|_{\text{op}} \leq \frac{\|\mathcal{T}_\ell\|_\infty^2 d^{2k+1}}{n^2}.$$

1445 Using Bernstein's inequality, with probability at least  $1 - \delta$ , we have

$$\begin{aligned} &\left\| \frac{1}{n^2} \sum_{i=1}^n \mathbf{Y}_i \mathbf{Y}_i^\top - \frac{1}{n} \left( \mathbb{E} [\mathbf{X} \mathbf{X}^\top] - \mathbb{E} [\mathbf{X}] \mathbb{E} [\mathbf{X}]^\top \right) \right\|_{\text{op}} \\ &\leq \frac{\|\mathcal{T}_k\|_\infty^2 d^{2k+1} \log(d/\delta)}{n^2} + \sqrt{\frac{C_k \|\mathcal{T}_\ell\|_\infty^4 d^{2k+1}}{n^2} + \frac{C_k \|\mathcal{T}_\ell\|_\infty^4 d^{3k+1} \log(d/\delta)}{n^3}} \\ &\leq \frac{\kappa_k^2 d^{2k+1} \log(d/\delta)}{n^2} + \sqrt{\frac{C_k \kappa_k^4 d^{2k+1}}{n^2} + \frac{C_k \kappa_k^4 d^{3k+1} \log(d/\delta)}{n^3}}. \end{aligned}$$

1446 This proves the desired claim. We prove the second identity. We proceed by first decoupling the  
1447 matrices (see [45, 19] Chapter 6.1), and we then focus on the  $\sum_{1 \leq i \neq j \leq n} \mathbf{X}_i \mathbf{X}'_j$ , where  $\mathbf{X}_j$  are i.i.d

1448 copies of  $\mathbf{X}_i$ , and rewriting the sum like  $\frac{1}{n^2} \sum_{i=1}^n \left( \mathbf{X}_i \sum_{j \neq i} \mathbf{X}'_j \right)$ ,

$$P \left( \left\| \frac{1}{n^2} \sum_{1 \leq i \neq j \leq n} \mathbf{Y}_i \mathbf{Y}_j^\top \right\|_{\text{op}} \geq t \right) \leq K P \left( \left\| \frac{1}{n^2} \sum_{i=1}^n \left( \mathbf{Y}_i \sum_{j \neq i} \mathbf{Y}'_j \right) \right\|_{\text{op}} \geq t \right),$$

1449 We use the following observation

$$\frac{1}{n^2} \sum_{i=1}^n \left( \mathbf{Y}_i \sum_{j \neq i} \mathbf{Y}_j'^\top \right) = \left( \frac{1}{n} \sum_{i=1}^n \mathbf{Y}_i \right) \cdot \left( \frac{1}{n} \sum_{j=1}^n \mathbf{Y}_j'^\top \right) - \frac{1}{n^2} \sum_{i=1}^n \mathbf{Y}_i \mathbf{Y}_i'^\top.$$

1450 We now use Bernstein's inequality for each of the terms, and we get that with probability with at least  
1451  $1 - 2K\delta$ , we have

$$\left\| \frac{1}{n^2} \sum_{1 \leq i \neq j \leq n} \mathbf{Y}_i \mathbf{Y}_j^\top \right\|_{\text{op}} \leq \sigma_2, \quad (89)$$

1452 where  $\sigma_2$  is given by

$$\sigma_2 = \frac{\kappa_k^2 d^{2k+1}}{3n^2} k \log \left( \frac{2d}{\delta} \right) + \sqrt{\frac{4C_k \kappa_k^2 d^{2k+1} k \log \left( \frac{2d}{\delta} \right)}{n^2}}.$$

1453 □

1454 *Proof of Lemma 21.* We want to bound the following quantity

$$\begin{aligned} & \|(\mathbf{M}_n - \mathbf{M}) \mathbf{M}^\top\|_{\text{op}} \\ &= \left\| (\mathbf{M}_n - \mathbf{M}) \frac{\mathbf{Mat}(\mathcal{H}_{2k+1}(\mathbf{w}))^\top}{\sqrt{n_{d,k}}} \right\|_{\text{op}} \\ &= C_k \beta_{d,k} \|(\mathbf{M}_n - \mathbf{M})^\top \mathbf{w}^{\otimes k+1} (\mathbf{w}^{\otimes k})^\top\|_{\text{op}} + \left\| (\mathbf{M}_n - \mathbf{M}) \left( \frac{\mathbf{Mat}(\mathcal{H}_{2k+1}(\mathbf{w}))^\top}{\sqrt{n_{d,k}}} - C_k \beta_{d,k} \mathbf{w}^{\otimes k+1} (\mathbf{w}^{\otimes k})^\top \right) \right\|_{\text{op}} \\ &= C_k \beta_{d,k} \|(\mathbf{M}_n - \mathbf{M}) \mathbf{w}^{\otimes k+1}\|_2 + \|(\mathbf{M}_n - \mathbf{M})\|_{\text{op}} \left\| \left( \frac{\mathbf{Mat}(\mathcal{H}_{2k+1}(\mathbf{w}))^\top}{\sqrt{n_{d,k}}} - C_k \beta_{d,k} \mathbf{w}^{\otimes k+1} (\mathbf{w}^{\otimes k})^\top \right) \right\|_{\text{op}} \\ &\leq C_k \beta_{d,k} \|(\mathbf{M}_n - \mathbf{M}) \mathbf{w}^{\otimes k+1}\|_2 + C_k d^{-1} \|\mathbf{M}_n - \mathbf{M}\|_{\text{op}}. \end{aligned}$$

1455 We then have with probability at least  $1 - \delta$ ,

$$\|\mathbf{M}_n - \mathbf{M}\|_{\text{op}} \leq \frac{\kappa_k d^{k+1}}{3n} k \log \left( \frac{2d}{\delta} \right) + \sqrt{\frac{4C_k \kappa_k^2 d^{k+1} k \log \left( \frac{2d}{\delta} \right)}{n}},$$

1456 Now, we focus on the first term, without losing any generality, we assume  $\mathbf{w}^* = \mathbf{e}_1$ . We define the  
1457 function  $f(\mathbf{z}) = \|(\mathbf{M}_n(\mathbf{z}) - \mathbf{M}) \mathbf{e}_1^{\otimes k+1}\|^2$ , we notice that  $f$  is a degree  $k$  polynomial of the sphere,  
1458 we then use Hypercontractivity lemma 25 to state the following tail bound

$$\mathbb{P}(|f(\mathbf{z}) - \mathbb{E}[f(\mathbf{z})]| \geq t) \leq ce^{-\left(\frac{t^2}{C \text{Var}(f(\mathbf{z}))}\right)^{1/k}}, \quad (90)$$

1459 where  $c, C$  are universal constants, and  $\text{Var}(f(\mathbf{z}))$  is the variance of  $f(\mathbf{z})$ . We first compute the  
1460 expectation of  $f$ ,

$$\begin{aligned} \mathbb{E}[f(\mathbf{z})] &= \mathbb{E}[\|(\mathbf{M}_n - \mathbf{M}) \mathbf{e}_1^{\otimes k+1}\|^2] \\ &= \frac{1}{n} \mathbb{E}[\mathcal{T}_{2k+1}(y, r)^2 \|(\mathbf{Mat}(\mathcal{H}_{2k+1}(\mathbf{z})) - \mathbb{E}[\mathbf{Y}(\mathbf{z})]) \mathbf{e}_1^{\otimes k+1}\|^2] \\ &\leq \frac{\|\mathcal{T}_{2k+1}\|_\infty^2}{n} \sum_{i_1, \dots, i_k} \mathbb{E}[\mathbf{Mat}(\mathcal{H}_{2k+1}(\mathbf{z}))_{i_1, \dots, i_k, 1, \dots, 1}^2] \\ &\leq \frac{C_k d^k \|\mathcal{T}_{2k+1}\|_\infty^2}{n}, \end{aligned}$$

1461 where we used the same computations that in proof of the even case to state that  
 1462  $\mathbb{E}[\mathbf{Mat}(\mathcal{H}_{2k+1})(\mathbf{z})_{i_1, \dots, i_k, 1, \dots, 1}^2] \leq \mathcal{C}_k$ . We now compute the variance parameter of  $f$ ,

$$\begin{aligned} \text{Var}(f(\mathbf{z})) &\leq \mathbb{E}[\|(\mathbf{M}_n - \mathbf{M})e_1^{\otimes k+1}\|^4] \\ &= \mathbb{E}\left[\left(\frac{1}{n^2} \sum_{i \neq j} \langle \mathbf{Y}_i e_1^{\otimes k+1}, \mathbf{Y}_j e_1^{\otimes k+1} \rangle\right)^2\right] \\ &= \frac{1}{n^4} \mathbb{E}\left[\sum_{i_1 \neq j_1, i_2 \neq j_2} (\langle \mathbf{Y}_{i_1} e_1^{\otimes k+1}, \mathbf{Y}_{j_1} e_1^{\otimes k+1} \rangle) (\langle \mathbf{Y}_{i_2} e_1^{\otimes k+1}, \mathbf{Y}_{j_2} e_1^{\otimes k+1} \rangle)\right] \\ &= \frac{1}{n^2} \mathbb{E}[\langle \mathbf{Y}_1 e_1^{\otimes k+1}, \mathbf{Y}_2 e_1^{\otimes k+1} \rangle^2] \\ &\leq \mathcal{C}_k \frac{d^{2k}}{n^2}. \end{aligned}$$

1463 Combining 90 with the two above bounds, we then have with probability at least  $1 - \delta$ ,

$$\|(\mathbf{M}_n - \mathbf{M})\mathbf{M}^\top\|_{\text{op}} \leq \frac{\mathcal{C}_{2k+1} d^k \kappa_k^2}{n} + \mathcal{C}_{2k+1} \frac{d^k}{n} \kappa_k^2 \log(C/\delta)^k.$$

1464 This is the desired result.  $\square$

1465 *Proof of Lemma 22.* The proof is very similar to the proof of lemma 16.  $\square$

1466 *Proof of Lemma 24.* The proof is similar in spirit to lemma 18, however we need to control an order  
 1467 4 tensor. In this proof, we use the following shortcuts  $\mathcal{S}_q(\mathbf{z}) := \text{Sym}(\mathbf{z}^{\otimes \ell-2q} \otimes \mathbf{I}_d^{\otimes q})$ . We then bound  
 1468 this in the following way

$$\mathbb{E}[\mathcal{H}_\ell(\mathbf{z}) \otimes \mathcal{H}_\ell(\mathbf{z}) \otimes \mathcal{H}_\ell(\mathbf{z}) \otimes \mathcal{H}_\ell(\mathbf{z})] = \sum_{q_1, q_2, q_3, q_4} c_{\ell, q_1} c_{\ell, q_2} c_{\ell, q_3} c_{\ell, q_4} \mathbb{E}[\mathcal{S}_{q_1}(\mathbf{z}) \otimes \mathcal{S}_{q_2}(\mathbf{z}) \otimes \mathcal{S}_{q_3}(\mathbf{z}) \otimes \mathcal{S}_{q_4}(\mathbf{z})].$$

1469 We denote  $\mathbf{i}^1 = (i_1, \dots, i_\ell)$ , and the same for  $\mathbf{i}^2, \mathbf{i}^3$ , and  $\mathbf{i}^4$ . We can focus on the term inside  
 1470 expectation, and we get by expanding this term as in proof of lemma

$$\begin{aligned} &\mathbb{E}[\mathcal{S}_{q_1}(\mathbf{z}) \otimes \mathcal{S}_{q_2}(\mathbf{z}) \otimes \mathcal{S}_{q_3}(\mathbf{z}) \otimes \mathcal{S}_{q_4}(\mathbf{z})]_{\mathbf{i}^1, \mathbf{i}^2, \mathbf{i}^3, \mathbf{i}^4} \\ &= \sum_{\sigma_1, \sigma_2, \sigma_3, \sigma_4 \in \mathfrak{S}_k} \frac{1}{\ell!^4} \mathbb{E}\left[\prod_{j=1}^{\ell-2q_1} \mathbf{z}_{i_{\sigma_1(j)}^1} \prod_{j=1}^{\ell-2q_2} \mathbf{z}_{i_{\sigma_2(j)}^2} \prod_{j=1}^{\ell-2q_3} \mathbf{z}_{i_{\sigma_3(j)}^3} \prod_{j=1}^{\ell-2q_4} \mathbf{z}_{i_{\sigma_4(j)}^4}\right] \prod_{l=1}^{q_1} \delta_{i_{\sigma_1(\ell-2q_1+2l-1)}^1, i_{\sigma_1(\ell-2q_1+2l)}^1} \\ &\times \prod_{l=1}^{q_2} \delta_{i_{\sigma_2(\ell-2q_2+2l-1)}^2, i_{\sigma_2(\ell-2q_2+2l)}^2} \prod_{l=1}^{q_3} \delta_{i_{\sigma_3(\ell-2q_3+2l-1)}^3, i_{\sigma_3(\ell-2q_3+2l)}^3} \prod_{l=1}^{q_4} \delta_{i_{\sigma_4(\ell-2q_4+2l-1)}^4, i_{\sigma_4(\ell-2q_4+2l)}^4} \\ &\simeq \mathcal{C}_\ell d^{2\ell-q_1-q_2-q_3-q_4} \sum_{\sigma_1, \sigma_2, \sigma_3, \sigma_4 \in \mathfrak{S}_\ell} \sum_{P \in P_{4\ell-2q_1-2q_2-2q_3-2q_4}^2} \prod_{\{r, s\}} \delta_{\gamma_r, \gamma_s} \prod_{l=1}^{q_1} \delta_{i_{\sigma_1(\ell-2q_1+2l-1)}^1, i_{\sigma_1(\ell-2q_1+2l)}^1} \\ &\times \prod_{l=1}^{q_2} \delta_{i_{\sigma_2(\ell-2q_2+2l-1)}^2, i_{\sigma_2(\ell-2q_2+2l)}^2} \prod_{l=1}^{q_3} \delta_{i_{\sigma_3(\ell-2q_3+2l-1)}^3, i_{\sigma_3(\ell-2q_3+2l)}^3} \prod_{l=1}^{q_4} \delta_{i_{\sigma_4(\ell-2q_4+2l-1)}^4, i_{\sigma_4(\ell-2q_4+2l)}^4}, \end{aligned}$$

1471 where we introduced  $\gamma$  is an enumeration of the set over the partition. We notice that we have

$$\text{Cont}(\mathcal{H}_\ell(\mathbf{z}) \otimes \mathcal{H}_\ell(\mathbf{z}) \otimes \mathcal{H}_\ell(\mathbf{z}) \otimes \mathcal{H}_\ell(\mathbf{z})) = \mathbf{Mat}(\mathcal{H}_\ell(\mathbf{z})) \mathbf{Mat}(\mathcal{H}_\ell(\mathbf{z}))^\top \mathbf{Mat}(\mathcal{H}_\ell(\mathbf{z})) \mathbf{Mat}(\mathcal{H}_\ell(\mathbf{z}))^\top.$$

1472 We compute  $\mathbb{E}[\text{Cont}(\mathcal{H}_\ell(\mathbf{z}) \otimes \mathcal{H}_\ell(\mathbf{z}) \otimes \mathcal{H}_\ell(\mathbf{z}) \otimes \mathcal{H}_\ell(\mathbf{z}))]_{(i_1, \dots, i_k), (j_1, \dots, j_k)},$   
 $\mathbb{E}[\mathcal{S}_{q_1}(\mathbf{z}) \otimes \mathcal{S}_{q_2}(\mathbf{z}) \otimes \mathcal{S}_{q_3}(\mathbf{z}) \otimes \mathcal{S}_{q_4}(\mathbf{z})]_{i_1, \dots, i_k, (j_1, \dots, j_k)}$   
 $= \sum_{\mathbf{u}^1, \mathbf{u}^2, \mathbf{u}^3} \mathbb{E}[\mathcal{S}_{q_1}(\mathbf{z}) \otimes \mathcal{S}_{q_2}(\mathbf{z}) \otimes \mathcal{S}_{q_3}(\mathbf{z}) \otimes \mathcal{S}_{q_4}(\mathbf{z})]_{(i, \mathbf{u}^1), (\mathbf{u}^1, \mathbf{u}^2), (\mathbf{u}^2, \mathbf{u}^3), (\mathbf{u}^3, \mathbf{j})}$   
 $\simeq \mathcal{C}_\ell d^{2\ell - q_1 - q_2 - q_3 - q_4} \sum_{\sigma_1, \sigma_2, \sigma_3, \sigma_4 \in \mathfrak{S}_\ell} \sum_{P \in P_{4\ell - 2q_1 - 2q_2 - 2q_3 - 2q_4}} \sum_{\mathbf{u}^1, \mathbf{u}^2, \mathbf{u}^3} \prod_{\{r, s\}} \delta_{\gamma_r, \gamma_s} \prod_{l=1}^{q_1} \delta_{i_{\sigma_1(\ell - 2q_1 + 2l - 1)}, i_{\sigma_1(\ell - 2q_1 + 2l)}}^{i_{\sigma_1(\ell - 2q_1 + 2l - 1)}, i_{\sigma_1(\ell - 2q_1 + 2l)}}$   
 $\times \prod_{l=1}^{q_2} \delta_{i_{\sigma_2(\ell - 2q_2 + 2l - 1)}, i_{\sigma_2(\ell - 2q_2 + 2l)}}^{i_{\sigma_2(\ell - 2q_2 + 2l - 1)}, i_{\sigma_2(\ell - 2q_2 + 2l)}}$   
 $\prod_{l=1}^{q_3} \delta_{i_{\sigma_3(\ell - 2q_3 + 2l - 1)}, i_{\sigma_3(\ell - 2q_3 + 2l)}}^{i_{\sigma_3(\ell - 2q_3 + 2l - 1)}, i_{\sigma_3(\ell - 2q_3 + 2l)}}$   
 $\prod_{l=1}^{q_4} \delta_{i_{\sigma_4(\ell - 2q_4 + 2l - 1)}, i_{\sigma_4(\ell - 2q_4 + 2l)}}^{i_{\sigma_4(\ell - 2q_4 + 2l - 1)}, i_{\sigma_4(\ell - 2q_4 + 2l)}}.$

1473 Let define the matrix  $M_{P, \sigma}$  with coefficients given by

$$(M_{P, \sigma})_{(i_1, \dots, i_k), (j_1, \dots, j_k)} = \sum_{\mathbf{u}^1, \mathbf{u}^2, \mathbf{u}^3} \prod_{\{r, s\}} \delta_{\gamma_r, \gamma_s} \prod_{l=1}^{q_1} \delta_{i_{\sigma_1(\ell - 2q_1 + 2l - 1)}, i_{\sigma_1(\ell - 2q_1 + 2l)}}^{i_{\sigma_1(\ell - 2q_1 + 2l - 1)}, i_{\sigma_1(\ell - 2q_1 + 2l)}}$$

$$\times \prod_{l=1}^{q_2} \delta_{i_{\sigma_2(\ell - 2q_2 + 2l - 1)}, i_{\sigma_2(\ell - 2q_2 + 2l)}}^{i_{\sigma_2(\ell - 2q_2 + 2l - 1)}, i_{\sigma_2(\ell - 2q_2 + 2l)}}$$

$$\times \prod_{l=1}^{q_3} \delta_{i_{\sigma_3(\ell - 2q_3 + 2l - 1)}, i_{\sigma_3(\ell - 2q_3 + 2l)}}^{i_{\sigma_3(\ell - 2q_3 + 2l - 1)}, i_{\sigma_3(\ell - 2q_3 + 2l)}}$$

$$\times \prod_{l=1}^{q_4} \delta_{i_{\sigma_4(\ell - 2q_4 + 2l - 1)}, i_{\sigma_4(\ell - 2q_4 + 2l)}}^{i_{\sigma_4(\ell - 2q_4 + 2l - 1)}, i_{\sigma_4(\ell - 2q_4 + 2l)}}.$$

1474 Using the same reasoning as in the proof of lemma 18, we are bounding the operator norm of this ma-  
1475 trix. We denote  $M_P := M_{P, id}$ . Fix  $P \in P \in P_{4\ell - 2q_1 - 2q_2 - 2q_3 - 2q_4}^2$ , and let assume  $\sigma = i_d$  without  
1476 losing any generality. Denote  $\mathcal{L} := \{i \in \{i_1, \dots, i_k, j_1, \dots, j_k\} : \exists p \in \{\mathbf{u}^1, \mathbf{u}^2, \mathbf{u}^3\} \text{ paired with } i\}$   
1477 i.e the set of indices which are paired with a term  $\{\mathbf{u}^1, \mathbf{u}^2, \mathbf{u}^3\}$ , and also denote  $n_P = \{p \in$   
1478  $\{\mathbf{u}^1, \mathbf{u}^2, \mathbf{u}^3\} : \exists u \in \{\mathbf{u}^1, \mathbf{u}^2, \mathbf{u}^3\} \text{ such that } p \text{ is paired with } u\}$ . In the following, we make some  
1479 abuse of notations and use  $i$  to denote an enumeration of  $\{i_1, \dots, i_m, j_1, \dots, j_m\}$  for the sake of  
1480 clarity, we then have

$$(M_P)_{(i_1, \dots, i_k), (j_1, \dots, j_k)}$$

$$= \sum_{\mathbf{u}^1, \mathbf{u}^2, \mathbf{u}^3} \prod_{\{r, s\}} \delta_{\gamma_r, \gamma_s} \prod_{l=1}^{q_1} \delta_{i_{\sigma_1(\ell - 2q_1 + 2l - 1)}, i_{\sigma_1(\ell - 2q_1 + 2l)}}^{i_{\sigma_1(\ell - 2q_1 + 2l - 1)}, i_{\sigma_1(\ell - 2q_1 + 2l)}}$$

$$\times \prod_{l=1}^{q_2} \delta_{i_{\sigma_2(\ell - 2q_2 + 2l - 1)}, i_{\sigma_2(\ell - 2q_2 + 2l)}}^{i_{\sigma_2(\ell - 2q_2 + 2l - 1)}, i_{\sigma_2(\ell - 2q_2 + 2l)}}$$

$$\times \prod_{l=1}^{q_3} \delta_{i_{\sigma_3(\ell - 2q_3 + 2l - 1)}, i_{\sigma_3(\ell - 2q_3 + 2l)}}^{i_{\sigma_3(\ell - 2q_3 + 2l - 1)}, i_{\sigma_3(\ell - 2q_3 + 2l)}}$$

$$\times \prod_{l=1}^{q_4} \delta_{i_{\sigma_4(\ell - 2q_4 + 2l - 1)}, i_{\sigma_4(\ell - 2q_4 + 2l)}}^{i_{\sigma_4(\ell - 2q_4 + 2l - 1)}, i_{\sigma_4(\ell - 2q_4 + 2l)}}.$$

$$= \prod_{i \in n_P} (\sum_{q_1, q_2} \delta_{q_1, q_2}) \prod_{i \in \mathcal{L}} (\sum_{q_i} \delta_{\ell_i, i}) \prod_{\{r, s\} \in P : r, s \notin \mathcal{L}} \delta_{\gamma_r, \gamma_s} \prod_{n=1 : n \notin \mathcal{L}}^{q_1} \delta_{i_{\sigma_1(\ell - 2q_1 + 2n - 1)}, i_{\sigma_1(\ell - 2q_1 + 2n)}}$$

$$\times \prod_{n=1 : n \notin \mathcal{L}}^{q_2} \delta_{i_{\sigma_2(\ell - 2q_2 + 2n - 1)}, i_{\sigma_2(\ell - 2q_2 + 2n)}}$$

$$\times \prod_{n=1 : n \notin \mathcal{L}}^{q_3} \delta_{i_{\sigma_3(\ell - 2q_3 + 2n - 1)}, i_{\sigma_3(\ell - 2q_3 + 2n)}}$$

$$\times \prod_{n=1 : n \notin \mathcal{L}}^{q_4} \delta_{i_{\sigma_4(\ell - 2q_4 + 2n - 1)}, i_{\sigma_4(\ell - 2q_4 + 2n)}}$$

$$= d^{|n_P|} \prod_{\{r, s\} \in P : r, s \notin \mathcal{L}} \delta_{\gamma_r, \gamma_s} \prod_{n=1 : n \notin \mathcal{L}}^{q_1} \delta_{i_{\sigma_1(\ell - 2q_1 + 2n - 1)}, i_{\sigma_1(\ell - 2q_1 + 2n)}}$$

$$\times \prod_{n=1 : n \notin \mathcal{L}}^{q_2} \delta_{i_{\sigma_2(\ell - 2q_2 + 2n - 1)}, i_{\sigma_2(\ell - 2q_2 + 2n)}}$$

$$\times \prod_{n=1 : n \notin \mathcal{L}}^{q_3} \delta_{i_{\sigma_3(\ell - 2q_3 + 2n - 1)}, i_{\sigma_3(\ell - 2q_3 + 2n)}}$$

$$\times \prod_{n=1 : n \notin \mathcal{L}}^{q_4} \delta_{i_{\sigma_4(\ell - 2q_4 + 2n - 1)}, i_{\sigma_4(\ell - 2q_4 + 2n)}}$$

1481 We proceed as in the proof of lemma 18, and we overall get the following inequality

$$\|M_P\|_{\text{op}} \leq \mathcal{C}_\ell d^{3k+3/2}.$$

1482 Using triangular inequality, we end up with the following bound

$$\|\mathbb{E}[\text{Cont}(\mathcal{S}_{q_1}(\mathbf{w}) \otimes \mathcal{S}_{q_2}(\mathbf{w}) \otimes \mathcal{S}_{q_3}(\mathbf{w}) \otimes \mathcal{S}_{q_4}(\mathbf{w}))]\|_{\text{op}} \leq \mathcal{C}_\ell d^{3k+3/2}.$$

1483 Combining all the bounds, we then have the desired statement

$$\|\mathbb{E}[\text{Cont}(\mathcal{H}_\ell(\mathbf{z}) \otimes \mathcal{H}_\ell(\mathbf{z}) \otimes \mathcal{H}_\ell(\mathbf{z}) \otimes \mathcal{H}_\ell(\mathbf{z}))]\|_{\text{op}} \leq \mathcal{C}_\ell d^{3k+3/2}.$$

1484

□

## 1485 G Proofs for Gaussian SIMs

1486 In this, we shall prove the results from Section 4. We first start by showing the rates on  $L^2$  norm of  
 1487 coefficients  $\xi_{d,\ell}$  for a Gaussian SIM of generative exponent  $k_*$  (cf. Lemma 1). We now prove our  
 1488 lemma on the rates of  $\xi_{d,\ell}$  when one is allowed to exploit the norm in the query.

1489 *Proof of Lemma 1.* We start by recalling that, from [15], Generative exponent  $k_*(\rho)$ , is only defined  
 1490 for  $\rho$  whose  $\nu_d$  is such that  $\nu_d \ll \bar{\nu}_{d,0}$ , where  $\bar{\nu}_{d,0} := \nu_{d,Y} \otimes \chi_d \otimes \tau_{d,1}$  is completely decoupled  
 1491 null, and  $\|\frac{d\nu_d}{d\bar{\nu}_{d,0}}\|_{L^2(\bar{\nu}_{d,0})}$  is bounded by a constant independent of  $d$ . Let  $\{\nu_d\}_d$  be a sequence of  
 1492 problems for Gaussian SIM  $\rho$ , i.e.  $\nu_R = \chi_d$  and  $\nu_d(Y | Z, R) = \rho(Y | Z \cdot R) = \rho(Y | X)$ . Let  
 1493  $\bar{\nu}_{d,0} = \nu_Y \otimes \nu_R \otimes \nu_Z$ . Let us consider the log-likelihood ratio decomposition in  $L^2(\bar{\nu}_{d,0})$  identical  
 1494 to the one in [15, Lemma D.1]

$$\frac{d\nu_d}{d\bar{\nu}_{d,0}}(y, r, z) - 1 \stackrel{L^2(\bar{\nu}_{d,0})}{=} \sum_{k \geq k_*} \zeta_k(y) \text{He}_k(r \cdot z), \quad \zeta_k(y) = \mathbb{E}_{(Y,R,Z) \sim \nu_d} [\text{He}_k(R \cdot Z) | Y = y].$$

1495 Denote  $\lambda_k = \|\zeta_k\|_{\nu_Y}$ , which are completely determined the model  $\rho$  independent of  $d$ , and by  
 1496 definition of generative exponent (2) we have  $\lambda_{k_*}^2 > 0$ . We now use the decomposition of Hermite  
 1497 into Gegenbauer polynomials from Proposition 2 to rewrite the above as

$$\frac{d\nu_d}{d\bar{\nu}_{d,0}}(y, r, z) - 1 \stackrel{L^2(\bar{\nu}_{d,0})}{=} \sum_{k \geq k_*} \zeta_k(y) \sum_{\ell=0}^k \beta_{k,\ell}(r) Q_\ell^{(d)}(z) = \sum_{\ell=0}^{\infty} Q_\ell^{(d)}(z) \sum_{k \geq k_*} \beta_{k,\ell}(r) \zeta_k(y).$$

1498 We can now expand the same directly in the Gegenbauer basis

$$\frac{d\nu_d}{d\bar{\nu}_{d,0}}(y, r, z) \stackrel{L^2(\bar{\nu}_{d,0})}{=} \bar{\xi}_{d,0}(y, r) + \sum_{\ell \geq 1} \bar{\xi}_{d,0}(y, r) \xi_{d,\ell}(y, r) Q_\ell^{(d)}(z),$$

where

$$\bar{\xi}_{d,0}(y, r) = \frac{d\nu_{d,Y,R}}{d\nu_{d,Y} \otimes \nu_{d,R}}(y, r) \quad \text{and} \quad \xi_{d,\ell}(y, r) = \mathbb{E}_{(Y,R,Z) \sim \nu_d} [Q_\ell^{(d)}(Z) | Y = y, R = r]$$

Equating both sides, we find that

$$\bar{\xi}_{d,0}(y, r) = \frac{d\nu_{d,Y,R}}{d\nu_{d,Y} \otimes \nu_{d,R}}(y, r) = 1 + \underbrace{\sum_{k \geq k_*} \zeta_k(y) \beta_{k,0}(r)}_{:= \psi(y, r)} = 1 + \psi(y, r),$$

and for  $\ell \geq 1$

$$\bar{\xi}_{d,\ell}(y, r) \xi_{d,\ell}(y, r) \stackrel{L^2(\bar{\nu}_{d,0})}{=} \sum_{k \geq k_*} \zeta_k(y) \beta_{k,\ell}(r) = \sum_{k \in \mathcal{I}_\ell} \zeta_k(y) \beta_{k,\ell}(r) \text{ where } \mathcal{I}_\ell := \{k \geq k_* : k \equiv \ell \pmod{2}\}.$$

1499 In the last equality, we used the fact that  $\beta_{k,\ell}(r) = 0$  for  $\ell \not\equiv k \pmod{2}$ . Our goal is to bound

$$\begin{aligned} \mathbb{E}_{\nu_d} [\xi_{d,\ell}(y, r)^2] &= \mathbb{E}_{\bar{\nu}_{d,0}} [\bar{\xi}_{d,0}(y, r) \xi_{d,\ell}(y, r)^2] = \mathbb{E}_{\bar{\nu}_{d,0}} [\bar{\xi}_{d,0}(y, r)^2 \xi_{d,\ell}(y, r)^2 \bar{\xi}_{d,0}(y, r)^{-1}] \\ &= (1 + o_d(1)) \mathbb{E}_{\bar{\nu}_{d,0}} [\bar{\xi}_{d,0}(y, r)^2 \xi_{d,\ell}(y, r)^2]. \end{aligned}$$

Thus, the problem has reduced to computing the expectation of the following term under  $\bar{\nu}_{d,0}$

$$\bar{\xi}_{d,0}(y, r)^2 \xi_{d,\ell}(y, r)^2 = \sum_{k \in \mathcal{I}_\ell} \beta_{k,\ell}(r)^2 \zeta_k^2(y) + 2 \sum_{(k_2 > k_1) \in \mathcal{I}_\ell} \zeta_{k_1}(y) \zeta_{k_1}(y) c_{k_1,\ell}(r) c_{k_2,\ell}(r).$$

$$\begin{aligned} \mathbb{E}_{\bar{\nu}_{d,0}} [\bar{\xi}_{d,0}(y, r)^2 \xi_{d,\ell}(y, r)^2] &= \sum_{k \in \mathcal{I}_\ell} \mathbb{E}[\beta_{k,\ell}(r)^2] \lambda_k^2 + 2 \sum_{(k_2 > k_1) \in \mathcal{I}_\ell} \mathbb{E}[\zeta_{k_1}(y) \zeta_{k_1}(y)] \mathbb{E}[c_{k_1,\ell}(r) c_{k_2,\ell}(r)]. \end{aligned} \tag{91}$$

We now use the bound from Lemma 3 and find the rates for each term in the above. For any  $\ell < k_*$  with  $\ell \equiv k_* \pmod{2}$  then

$$\sum_{k \geq \mathcal{I}_\ell} \mathbb{E}[\beta_{k,\ell}(r)^2] \lambda_k^2 \asymp \lambda_{k_*}^2 d^{-(k_* - \ell)/2} + \sum_{k_* < k \in \mathcal{I}_\ell} \lambda_k^2 d^{-(k - \ell)/2} \asymp \lambda_{k_*} d^{-(k_* - \ell)/2},$$

1501 where in the last step we noticed that the latter term forms a geometric series with decaying ratio  
 1502 whose leading term is of smaller order than the former term. We now show that the cross terms from  
 1503 (91) are of smaller order in the absolute value.

$$\begin{aligned}
 \left| \sum_{(k_2 > k_1) \in \mathcal{I}_\ell} \mathbb{E}[\zeta_{k_1}(y)\zeta_{k_1}(y)]\mathbb{E}[c_{k_1,\ell}(r)c_{k_2,\ell}(r)] \right| &\leq \sum_{(k_2 > k_1) \in \mathcal{I}_\ell} |\mathbb{E}[\zeta_{k_1}(y)\zeta_{k_1}(y)]| \cdot |\mathbb{E}[c_{k_1,\ell}(r)c_{k_2,\ell}(r)]| \\
 &\leq \sum_{(k_2 > k_1) \in \mathcal{I}_\ell} |\lambda_{k_1}\lambda_{k_2}| \cdot \sqrt{\mathbb{E}[c_{k_1,\ell}(r)^2] \cdot \mathbb{E}[c_{k_2,\ell}(r)^2]} \\
 &\lesssim \sum_{(k_2 > k_1) \in \mathcal{I}_\ell} d^{-\left(\frac{k_1+k_2}{4}-\frac{\ell}{2}\right)} \lesssim \sum_{k_1 \in \mathcal{I}_\ell} d^{-\left(\frac{k_1-\ell}{2}+1\right)} \\
 &\lesssim d^{-\left(\frac{k_\star-\ell}{2}+1\right)}.
 \end{aligned}$$

Substituting this bound in (91), we conclude that for any  $\ell < k_\star$  with  $\ell \equiv k_\star \pmod{2}$ , we have

$$\mathbb{E}_{\bar{\nu}_{d,0}}[\bar{\xi}_{d,0}(y,r)^2\xi_{d,\ell}(y,r)^2] \asymp d^{-(k_\star-\ell)/2}.$$

We now do similar simplifications for the case  $\ell < k_\star$  such that  $\ell \not\equiv k_\star \pmod{2}$ .

$$\sum_{k \geq \mathcal{I}_\ell} \mathbb{E}[\beta_{k,\ell}(r)^2]\lambda_k^2 \asymp \min_{\substack{k > k_\star \\ k \in \mathcal{I}_\ell}} \lambda_k^2 d^{-(k-\ell)/2} \lesssim d^{-(k_\star+1-\ell)/2}.$$

1504 **Bounding the cross terms**

$$\begin{aligned}
 \left| \sum_{(k_2 > k_1) \in \mathcal{I}_\ell} \mathbb{E}[\zeta_{k_1}(y)\zeta_{k_1}(y)]\mathbb{E}[c_{k_1,\ell}(r)c_{k_2,\ell}(r)] \right| &\leq \sum_{(k_2 > k_1) \in \mathcal{I}_\ell} |\lambda_{k_1}\lambda_{k_2}| \cdot \sqrt{\mathbb{E}[c_{k_1,\ell}(r)^2] \cdot \mathbb{E}[c_{k_2,\ell}(r)^2]} \\
 &\lesssim \sum_{(k_2 > k_1) \in \mathcal{I}_\ell} d^{-\left(\frac{k_1+k_2}{4}-\frac{\ell}{2}\right)} \lesssim \sum_{k_1 \in \mathcal{I}_\ell} d^{-\left(\frac{k_1-\ell}{2}+1\right)} \\
 &\lesssim d^{-\left(\frac{k_\star+1-\ell}{2}+1\right)}.
 \end{aligned}$$

Putting the bounds in (91), for any  $\ell < k_\star$  such that  $\ell \not\equiv k_\star \pmod{2}$ , we have

$$\mathbb{E}_{\bar{\nu}_{d,0}}[\bar{\xi}_{d,0}(y,r)\xi_{d,\ell}(y,r)^2] \lesssim d^{-(k_\star+1-\ell)/2}.$$

1505

□

1506 We next show the proof of Lemma 2 which helps us characterize the complexity when one is only  
 1507 allowed to use the directional component  $z$ .

1508 *Proof of Lemma 2.* The proof is very similar to that of Lemma 1, but with a slightly more care in the  
 1509 decomposition to account for the fact that we only observe  $(y, z)$ . For clarity, we will continue to  
 1510 denote the original problem  $(y, \mathbf{x})$  with  $\nu_d$ , and the new spherical single index model where one only  
 1511 observes  $(y, z)$  by  $\nu_d$ .

1512 Again, we have  $\{\nu_d\}_d$  with  $\nu_R = \chi_d$  and  $\rho(Y \mid X) = \rho(Y \mid Z \cdot R) = \nu_d(Y \mid Z, R)$ . Let  
 1513  $\bar{\nu}_{d,0} = \nu_Y \otimes \nu_R \otimes \nu_Z$  be the completely decoupled null. We will also let  $\{\nu_d\}_d$  be the sequence of  
 1514 problem associated with  $\{\nu_d\}_d$  where we only observe  $(y, z)$ . We have

$$\begin{aligned}
 \frac{d\nu_d}{d\bar{\nu}_{d,0}}(y, r, z) - 1 &\stackrel{L^2(\bar{\nu}_{d,0})}{=} \sum_{k \geq k_\star} \zeta_k(y) \text{He}_k(r \cdot z), \text{ where } \zeta_k(y) = \mathbb{E}_{(Y,R,Z) \sim \nu_d}[\text{He}_k(R \cdot Z) \mid Y = y] \\
 &\stackrel{L^2(\bar{\nu}_{d,0})}{=} \sum_{k \geq k_\star} \zeta_k(y) \sum_{\ell=0}^k \beta_{k,\ell}(r) Q_\ell^{(d)}(z) = \sum_{\ell=0}^{\infty} Q_\ell^{(d)}(z) \sum_{k \geq k_\star} \beta_{k,\ell}(r) \zeta_k(y),
 \end{aligned}$$

1515 where in the second line, we used the harmonic decomposition of Hermite from Proposition 2. We  
 1516 marginalize the radius to explicitly write the likelihood ratio of only  $(y, z)$  part under  $\nu_d$  and  $\bar{\nu}_{d,0}$ , is  
 1517 identical to that of  $\nu_d$  and  $\nu_{d,0} = \nu_Y \otimes \tau_{d,1}$ .

$$\frac{d\nu_d}{d\nu_{d,0}}(y, z) - 1 \stackrel{L^2(\nu_{d,0})}{=} \sum_{\ell=0}^{\infty} Q_\ell^{(d)}(z) \sum_{k \geq k_\star} \mathbb{E}[\beta_{k,\ell}(r)] \zeta_k(y).$$

1518 We can also expand the log likelihood ratio of  $(y, z)$  directly in the Gegenbauer basis

$$\frac{dv_d}{dv_{d,0}}(y, z) - 1 \stackrel{L^2(v_{d,0})}{=} \sum_{\ell \geq 1} \xi_{d,\ell}(y) Q_\ell^{(d)}(z), \text{ where } \xi_{d,\ell}(y) = \mathbb{E}_{(Y,Z) \sim v_d}[Q_\ell^{(d)}(Z) \mid Y = y].$$

Equating both, we have for any  $\ell \geq 1$

$$\xi_{d,\ell}(y) \stackrel{L^2(v_{d,0})}{=} \sum_{k \geq k_\star} \zeta_k(y) \mathbb{E}[\beta_{k,\ell}(r)] = \sum_{k \in \mathcal{I}_\ell} \zeta_k(y) \mathbb{E}[\beta_{k,\ell}(r)] \text{ where } \mathcal{I}_\ell := \{k \geq k_\star : k \equiv \ell \pmod{2}\}.$$

Squaring both sides

$$\xi_{d,\ell}(y)^2 = \sum_{k \geq \mathcal{I}_\ell} \mathbb{E}[\beta_{k,\ell}(r)]^2 \zeta_k^2(y) + 2 \sum_{(k_2 > k_1) \in \mathcal{I}_\ell} \zeta_{k_1}(y) \zeta_{k_2}(y) \mathbb{E}[c_{k_1,\ell}(r)] \mathbb{E}[c_{k_2,\ell}(r)].$$

1519

$$\|\xi_{d,\ell}\|_{L^2(v_Y)}^2 = \sum_{k \in \mathcal{I}_\ell} \mathbb{E}[\beta_{k,\ell}(r)]^2 \lambda_k^2 + 2 \sum_{(k_2 > k_1) \in \mathcal{I}_\ell} \mathbb{E}[\zeta_{k_1}(y) \zeta_{k_2}(y)] \mathbb{E}[c_{k_1,\ell}(r)] \mathbb{E}[c_{k_2,\ell}(r)]. \quad (92)$$

We now use the rates on  $\mathbb{E}_{r \sim \chi_d}[\beta_{k,\ell}(r)]^2$  from Lemma 3 to carry out the simplification similar to the one done in the proof of Lemma 1. For any  $\ell < k_\star$  with  $\ell \equiv k_\star \pmod{2}$

$$\sum_{k \in \mathcal{I}_\ell} \mathbb{E}[\beta_{k,\ell}(r)]^2 \lambda_k^2 \asymp \lambda_{k_\star}^2 d^{-(k_\star - \ell)} + \sum_{k_\star < k \in \mathcal{I}_\ell} \lambda_k^2 d^{-(k - \ell)} \asymp \lambda_{k_\star}^2 d^{-(k_\star - \ell)},$$

1520 where the step followed by observing that it is a sum of geometric series whose rate is dominated by  
1521 the first term. We now show the bound on the magnitude of the cross terms

$$\begin{aligned} \left| \sum_{(k_2 > k_1) \in \mathcal{I}_\ell} \mathbb{E}[\zeta_{k_1}(y) \zeta_{k_2}(y)] \mathbb{E}[c_{k_1,\ell}(r)] \mathbb{E}[c_{k_2,\ell}(r)] \right| &\leq \sum_{(k_2 > k_1) \in \mathcal{I}_\ell} |\mathbb{E}[\zeta_{k_1}(y) \zeta_{k_2}(y)]| \cdot |\mathbb{E}[c_{k_1,\ell}(r)] \mathbb{E}[c_{k_2,\ell}(r)]| \\ &\leq \sum_{(k_2 > k_1) \in \mathcal{I}_\ell} |\lambda_{k_1} \lambda_{k_2}| \cdot \sqrt{\mathbb{E}[c_{k_1,\ell}(r)]^2 \cdot \mathbb{E}[c_{k_2,\ell}(r)]^2} \\ &\lesssim \sum_{(k_2 > k_1) \in \mathcal{I}_\ell} d^{-\left(\frac{k_1 + k_2}{2} - \ell\right)} \lesssim \sum_{k_1 \in \mathcal{I}_\ell} d^{-(k_1 - \ell + 1)} \\ &\lesssim d^{-(k_\star - \ell + 1)}. \end{aligned}$$

Combining these rates with (92), we obtain for any  $\ell < k_\star$  with  $\ell \equiv k_\star \pmod{2}$ ,

$$\|\xi_{d,\ell}\|_{L^2(v_Y)}^2 = \mathbb{E}_v[\xi_{d,\ell}(y)^2] \asymp d^{-(k_\star - \ell)}.$$

We do similar calculation now for  $\ell < k_\star$  such that  $\ell \not\equiv k_\star \pmod{2}$ .

$$\sum_{k \geq \mathcal{I}_\ell} \mathbb{E}[\beta_{k,\ell}(r)]^2 \lambda_k^2 \asymp \min_{\substack{k > k_\star \\ k \in \mathcal{I}_\ell}} \lambda_k^2 d^{-(k - \ell)} \lesssim d^{-(k_\star - \ell + 1)}.$$

1522 Bounding the cross terms

$$\begin{aligned} \left| \sum_{(k_2 > k_1) \in \mathcal{I}_\ell} \mathbb{E}[\zeta_{k_1}(y) \zeta_{k_2}(y)] \mathbb{E}[c_{k_1,\ell}(r)] \mathbb{E}[c_{k_2,\ell}(r)] \right| &\leq \sum_{(k_2 > k_1) \in \mathcal{I}_\ell} |\lambda_{k_1} \lambda_{k_2}| \cdot |\mathbb{E}[c_{k_1,\ell}(r)] \cdot \mathbb{E}[c_{k_2,\ell}(r)]| \\ &\lesssim \sum_{(k_2 > k_1) \in \mathcal{I}_\ell} d^{-\left(\frac{k_1 + k_2}{2} - \ell\right)} \lesssim \sum_{k_1 \in \mathcal{I}_\ell} d^{-(k_1 - \ell + 1)} \lesssim d^{-(k_\star - \ell + 2)}. \end{aligned}$$

Substituting these bounds in (92), for any  $\ell < k_\star$  such that  $\ell \not\equiv k_\star \pmod{2}$ , we have

$$\mathbb{E}_{\tilde{v}_{d,0}}[\xi_{d,\ell}(y, r)^2] \lesssim d^{-(k_\star - \ell + 1)}.$$

1523

□

## 1524 H Information-theoretic sample complexity

1525 In this section, we prove an information-theoretic sample complexity upper bound. We exhibit an  
 1526 estimator (which is not computable in polynomial time) that achieves strong recovery with  $O(d)$   
 1527 samples for general spherically symmetric measure under a mild assumption on the sequence  $\{\nu_d\}$   
 1528 that there is  $\ell \geq 1$  such that  $\|\xi_{d,\ell}\|_{L^2} = \Omega_d(1)$  (cf. Appendix A). The proof is directly adapted from  
 1529 [15, Theorem 6.1].

1530 **Proposition 6.** *Under the assumption that there exists  $\ell \geq 1$  such that  $\|\xi_{d,\ell}\|_{L^2} = \Theta_d(1)$ ,  
 1531 there exists an estimator (non polynomially computable) that returns  $\hat{\mathbf{w}} \in \mathbb{S}^{d-1}$  that satisfies  
 1532  $|\langle \hat{\mathbf{w}}, \mathbf{w}_* \rangle| \geq 1 - \varepsilon$ , with probability at least  $1 - 2e^{-d}$  with information theoretic sample complexity  
 1533  $m = O\left(\frac{d}{\varepsilon^2} \log(1/\varepsilon)\right)$ , hiding constants in  $\ell$  and  $\|\xi_{d,\ell}\|_{L^2}$ .*

1534 *Proof.* For any  $\delta > 0$ , let  $\mathcal{N}_\delta$  be a  $\delta$ -net of  $\mathbb{S}^{d-1}$ , and we can choose  $\mathcal{N}_\delta$  such that  $|\mathcal{N}_\delta| \leq \left(\frac{3}{\delta}\right)^d$ .  
 1535 Consider the following  $g(y, r, z) = \xi_{d,\ell}(y, r)Q_\ell(z)$ . For simplicity, let us denote  $\beta_{d,\ell} = \|\xi_{d,\ell}\|_{L^2}$   
 1536 Fix a truncation  $R > 0$ , and denote  $L_n(\mathbf{w})$  defined as

$$L_n(\mathbf{w}) := \frac{1}{n} \sum_{i=1}^n g(\langle \mathbf{w}, \mathbf{z}_i \rangle, y_i, r_i) \mathbf{1}_{|g(\langle \mathbf{w}, \mathbf{z}_i \rangle, y_i, r_i)| \leq R}.$$

1537 We consider the min-max estimator

$$\hat{\mathbf{w}} \in \arg \min_{\hat{\mathbf{w}} \in \mathbb{S}^{d-1}} \max_{\mathbf{w} \in \mathcal{N}_\delta} \left| L_n(\mathbf{w}) - \frac{\beta_{d,\ell}^2 Q_\ell(\langle \mathbf{w}, \hat{\mathbf{w}} \rangle)}{\sqrt{n_{d,\ell}}} \right|.$$

1538 Using Lemma 27, we have

$$\mathbb{E}[g(\langle \mathbf{w}, \mathbf{z} \rangle, y, r)^2] = \mathbb{E}[\xi_{d,\ell}(\langle \mathbf{w}, \mathbf{z} \rangle)^2 Q_\ell(\langle \mathbf{w}, \mathbf{z} \rangle)^2] \leq \beta_{d,\ell}^2 \log(3/\beta_{d,\ell}^2)^{k/2}.$$

1539 Using Bernstein's lemma, we have for any  $\mathbf{w} \in \mathbb{S}^{d-1}$ , with probability at least  $1 - 2e^{-t}$

$$|L_n(\mathbf{w}) - \mathbb{E}[L_n(\mathbf{w})]| \leq \sqrt{\frac{\beta_{d,\ell}^2 \log\left(\frac{3}{\beta_{d,\ell}^2}\right)^{\ell/2} t}{n}} + \frac{Rt}{n}.$$

1540 By union bound and setting  $t = d \left(\log\left(\frac{3}{\delta}\right) + 1\right)$ , we then have with probability at least  $1 - 2e^{-d}$ ,

$$\sup_{\mathbf{w} \in \mathcal{N}_\delta} |L_n(\mathbf{w}) - \mathbb{E}[L_n(\mathbf{w})]| \lesssim \sqrt{\frac{\beta_{d,\ell}^2 \log\left(\frac{3}{\beta_{d,\ell}^2}\right)^{k/2} d \log\left(\frac{3}{\delta}\right)}{n}} + \frac{Rd \left(\log\left(\frac{1}{\delta}\right)\right)}{n}. \quad (93)$$

1541 We bound the effect of the truncation

$$\begin{aligned} |\mathbb{E}[L_n(\mathbf{w}) - \mathbb{E}[g(\langle \mathbf{w}, \mathbf{z} \rangle, y, r)]]| &= |\mathbb{E}[g(\langle \mathbf{w}, \mathbf{z} \rangle, y, r) \mathbf{1}_{|g(\langle \mathbf{w}, \mathbf{z} \rangle, y, r)| \geq R}]| \\ &\leq \sqrt{\mathbb{E}[g(\langle \mathbf{w}, \mathbf{z} \rangle, y, r)^2] \mathbb{P}(|g(\langle \mathbf{w}, \mathbf{z} \rangle, y, r)| > R)} \\ &\leq \beta_{d,\ell} \sqrt{\mathbb{P}(|g(\langle \mathbf{w}, \mathbf{z} \rangle, y, r)| > R)}. \end{aligned}$$

1542 We then have the following control on the moments of  $|g(\langle \mathbf{w}, \mathbf{z} \rangle, y, r)|$

$$\mathbb{E}[|g(\langle \mathbf{w}, \mathbf{z} \rangle, y, r)|^p]^{1/p} \leq \mathbb{E}[|Q_\ell(\langle \mathbf{w}, \mathbf{z} \rangle)|^p |\xi_{d,\ell}(y, r)|^p]^{1/p} \leq (2p)^\ell,$$

1543 by using Jensen inequality and spherical hypercontractivity. By taking  $R \geq (2e)^\ell$ , and  $\delta = R^{1/\ell}/2e$

$$\mathbb{P}(|g(\langle \mathbf{w}, \mathbf{z} \rangle, y, r)| > R) \leq \frac{2p^{\ell p}}{R^p} \leq \exp\left(-\frac{\ell}{2e} R^{1/\ell}\right)$$

1544 Combining the two inequalities gives

$$|\mathbb{E}[L_n(\mathbf{w})] - \mathbb{E}[g(\langle \mathbf{w}, \mathbf{z} \rangle, y, r)]| \leq \beta_{d,\ell} \exp\left(-\frac{\ell}{4e} R^{1/\ell}\right).$$

1545 Combining the above inequalities, we then have

$$\begin{aligned}
& \max_{\mathbf{w} \in \mathcal{N}_\delta} \left| \frac{\beta_{d,\ell}^2 Q_\ell(\langle \mathbf{w}, \mathbf{w}_* \rangle)}{\sqrt{n_{d,\ell}}} - \frac{\beta_{d,\ell}^2 Q_\ell(\langle \mathbf{w}, \hat{\mathbf{w}} \rangle)}{\sqrt{n_{d,\ell}}} \right| \\
& \leq \max_{\mathbf{w} \in \mathcal{N}_\delta} \left| L_n(\mathbf{w}) - \frac{\beta_{d,\ell}^2 Q_\ell(\langle \mathbf{w}, \mathbf{w}_* \rangle)}{\sqrt{n_{d,\ell}}} \right| + \max_{\mathbf{w} \in \mathcal{N}_\delta} \left| L_n(\mathbf{w}) - \frac{\beta_{d,\ell}^2 Q_\ell(\langle \mathbf{w}, \hat{\mathbf{w}} \rangle)}{\sqrt{n_{d,\ell}}} \right| \\
& \leq 2 \max_{\mathbf{w} \in \mathcal{N}_\delta} \left| L_n(\mathbf{w}) - \frac{\beta_{d,\ell}^2 Q_\ell(\langle \mathbf{w}, \mathbf{w}_* \rangle)}{\sqrt{n_{d,\ell}}} \right| \\
& \leq 2 \max_{\mathbf{w} \in \mathcal{N}_\delta} |L_n(\mathbf{w}) - \mathbb{E}[g(\langle \mathbf{w}, \mathbf{z} \rangle, y, r)]| \\
& \leq \max_{\mathbf{w} \in \mathcal{N}_\delta} |L_n(\mathbf{w}) - \mathbb{E}[L_n(\mathbf{w})]| + 3^\ell \exp\left(-\frac{\ell}{4e} R^{1/\ell}\right) \\
& \leq \sqrt{\frac{\beta_{d,\ell}^2 \log\left(\frac{3}{\beta_{d,\ell}^2}\right)^{k/2} t}{n}} + \frac{Rt}{n} + 3^\ell \exp\left(-\frac{\ell}{4e} R^{1/\ell}\right).
\end{aligned}$$

1546 We have the following

$$\begin{aligned}
\left| \frac{Q_\ell(\langle \mathbf{w}, \mathbf{w}_* \rangle) - Q_\ell(\langle \mathbf{w}, \hat{\mathbf{w}} \rangle)}{\sqrt{n_{d,\ell}}} \right| &= \frac{1}{\sqrt{n_{d,\ell}}} \left| \sum_{q=0}^{\lfloor \ell/2 \rfloor} c_{\ell,q} (\langle \mathbf{w}, \mathbf{w}_* \rangle^{\ell-2q} - \langle \mathbf{w}, \hat{\mathbf{w}} \rangle^{\ell-2q}) \right| \\
&= \frac{c_{\ell,0}}{\sqrt{n_{d,\ell}}} |\langle \mathbf{w}, \mathbf{w}_* \rangle^\ell - \langle \mathbf{w}, \hat{\mathbf{w}} \rangle^\ell| + O(d^{-1}).
\end{aligned}$$

1547 We then deduce that

$$\max_{\mathbf{w} \in \mathcal{N}_\delta} \left| \frac{\beta_{d,\ell}^2 Q_\ell(\langle \mathbf{w}, \mathbf{w}_* \rangle)}{\sqrt{n_{d,\ell}}} - \frac{\beta_{d,\ell}^2 Q_\ell(\langle \mathbf{w}, \hat{\mathbf{w}} \rangle)}{\sqrt{n_{d,\ell}}} \right| = \frac{\beta_{d,\ell}^2 c_{\ell,0}}{\sqrt{n_{d,\ell}}} \max_{\mathbf{w} \in \mathcal{N}_\delta} |\langle \mathbf{w}, \mathbf{w}_* \rangle^\ell - \langle \mathbf{w}, \hat{\mathbf{w}} \rangle^\ell| + O(d^{-1}).$$

1548 Using [22, Lemma 25], we then have

$$\frac{\beta_{d,\ell}^2 c_{\ell,0}}{\sqrt{n_{d,\ell}}} \min_{s \in \{\pm 1\}} \|s\hat{\mathbf{w}} - \mathbf{w}_*\| \lesssim \beta_{d,\ell}^2 \left( \max_{\mathbf{w} \in \mathcal{N}_\delta} \left| \frac{Q_\ell(\langle \mathbf{w}, \mathbf{w}_* \rangle)}{\sqrt{n_{d,\ell}}} - \frac{Q_\ell(\langle \mathbf{w}, \hat{\mathbf{w}} \rangle)}{\sqrt{n_{d,\ell}}} \right| + \delta + O(d^{-1}) \right)$$

1549 Using this inequality above, and plugging the inequality, we have

$$\min_{s \in \{\pm 1\}} \|s\hat{\mathbf{w}} - \mathbf{w}_*\|_2 \lesssim \sqrt{\frac{\beta_{d,\ell}^2 \log\left(\frac{3}{\beta_{d,\ell}^2}\right)^{\ell/2} d \log\left(\frac{3}{\delta}\right)}{n}} + \delta + \frac{Rd \log\left(\frac{3}{\delta}\right)}{n} + 3^\ell \exp\left(-\frac{\ell}{4e} R^{1/\ell}\right)$$

1550 Choosing  $R = (4e \log(3/\delta))^\ell$ , it yields

$$\frac{\beta_{d,\ell}^2 c_{\ell,0}}{\sqrt{n_{d,\ell}}} \min_{s \in \{\pm 1\}} \|s\hat{\mathbf{w}} - \mathbf{w}_*\| \lesssim \delta + \sqrt{\frac{\beta_{d,\ell}^2 \log\left(\frac{3}{\beta_{d,\ell}^2}\right)^{\ell/2} d \log\left(\frac{3}{\delta}\right)}{n}} + \frac{Rd \log\left(\frac{3}{\delta}\right)}{n} + 3^\ell \exp\left(-\frac{\ell}{4e} R^{1/\ell}\right).$$

1551 Taking  $\delta = O(\varepsilon \beta_{d,\ell}^2)$  concludes the proof.  $\square$

## 1552 I Additional technical results

1553 The distribution  $\tau_d = \text{Unif}(\mathbb{S}^{d-1})$  has a well-celebrated hypercontractivity property.

**Lemma 25** (Spherical Hypercontractivity [3]). *For any  $\ell \in \mathbb{N}$  and  $f \in L^2(\tau_d)$  which is a degree  $\ell$  polynomial, for any  $p \geq 2$ , we have*

$$\|f\|_{L^p(\tau_d)} \leq (p-1)^{\ell/2} \|f\|_{L^2(\tau_d)}.$$

1554 We will often couple this with the following standard tail-bound.

**Lemma 26** (Lemma 24 in [14]). *Let  $\delta \geq 0$  and  $X$  be a mean zero random variable satisfying*

$$\mathbb{E}[|X|^p]^{1/p} \leq B p^{k/2} \text{ for } p = \frac{2 \log(1/\delta)}{k},$$

1555 *for some  $k$ . Then with probability  $1 - \delta$ , we have  $|X| \leq B p^{k/2}$ .*

1556 Similar to [14], we will use the following lemma to bound  $\mathbb{E}[XY]$  instead of standard Cauchy-  
1557 Schwarz, when we have a tight bound  $\|X\|_1$  and all moments  $\|Y\|_p$  but a very loose bound on  
1558  $\|X\|_2$ .

**Lemma 27** (Lemma 23 in [14]). *Let  $X, Y$  be random variables with  $\|Y\|_p \leq B p^{k/2}$ . Then*

$$\mathbb{E}[XY] \leq \|X\|_1 \cdot B \cdot (2e)^{k/2} \cdot \max \left( 1, \frac{2}{k} \log \left( \frac{\|X\|_2}{\|X\|_1} \right) \right)^{k/2}$$

1559 .

1560 **Lemma 28** (Lemma I.5 in [15]). *Let  $\mathbf{Y} = \sum_{i=1}^n \mathbf{Z}_i$ , where  $\mathbf{Z}_i$  are self-adjoint, mean zero, i.i.d.*  
1561 *Define*

$$\sigma = \|\mathbb{E}[\mathbf{Y}^2]\|_2^{1/2}, \quad \sigma^* = \sup_{\mathbf{v}, \mathbf{w} \in \mathbb{S}^{d-1}} \mathbb{E}[(\langle \mathbf{v}, \mathbf{Y} \mathbf{w} \rangle)^2]^{1/2}, \quad \bar{R} = \mathbb{E}[\max_{i \in [n]} \|\mathbf{Z}_i\|^2]^{1/2}.$$

1562 *Then for*

$$R \geq \bar{R}^{1/2} \sigma^{1/2} + \sqrt{2} \bar{R}$$

1563 *and  $t \geq 0$ , if  $\delta = \mathbb{P}(\max \|\mathbf{Z}_i\| \geq R)$  with probability  $1 - \delta - de^{-t}$*

$$\|\mathbf{Y} - \mathbb{E}[\mathbf{Y}]\| \leq 2\sigma + \sigma_* t^{1/2} + R^{1/3} \sigma^{2/3} t^{2/3} + Rt.$$

1564 **Lemma 29.** *Let  $\{Z_i\}_{i \in [n]}$  be a sequence of independent random variables with polynomial tails,*  
1565 *i.e. there exists  $B, k$  such that  $\mathbb{E}[|Z_i|^p]^{1/p} \leq B p^{k/2}$ . Define  $R = \max_{i \in [n]} Z_i$ . Then for any*  
1566  *$p \leq \log n/k$ , we have  $\mathbb{E}[|R|^p]^{1/p} \leq B \log^{k/2}(n)$  and for any  $\delta \geq 0$ , with probability at least  $1 - \delta$ ,*  
1567  *$R \leq B \log^{k/2}(n/\delta)$ .*

**Lemma 30** (Lemma I.3 from [15]). *Let  $X_1, \dots, X_n$  be independent mean zero random variables*  
*such that for all  $p \geq 2$ , we have  $\|X_i\|_p \leq B p^{k/2}$  for some  $k$  and let  $\sigma^2 = \sum_{i=1}^n \mathbb{E}[X_i^2]$ . Let*  
 *$Y = \sum_{i=1}^n X_i$ . Then with probability at least  $1 - \delta$ ,*

$$|Y| \lesssim_k \sigma \sqrt{\log(1/\delta)} + B \log(1/\delta) \log(n/\delta)^{k/2}.$$

1568 **Lemma 31** ([44]). *Let  $\mathbf{X}_k$  be i.i.d random matrices of dimensions  $d_1 \times d_2$ . Assume that each matrix*  
1569 *is bounded by*

$$\forall k, \|\mathbf{X}_k - \mathbb{E}[\mathbf{X}_k]\|_{\text{op}} \leq L.$$

1570 *Consider  $v(\mathbf{Z}) = \max\{\|\sum_{k=1}^n \mathbb{E}[(\mathbf{X}_k - \mathbb{E}[\mathbf{X}_k])(\mathbf{X}_k - \mathbb{E}[\mathbf{X}_k])^\top]\|, \|\sum_{k=1}^n \mathbb{E}[(\mathbf{X}_k -$*   
1571  *$\mathbb{E}[\mathbf{X}_k])^\top(\mathbf{X}_k - \mathbb{E}[\mathbf{X}_k])]\|\}$ , then with probability at least  $1 - \delta$ ,*

$$\left\| \sum_{k=1}^n (\mathbf{X}_k - \mathbb{E}[\mathbf{X}_k]) \right\|_{\text{op}} \leq \frac{L}{3} \log \left( \frac{d_1 + d_2}{\delta} \right) + \sqrt{4v \log \left( \frac{d_1 + d_2}{\delta} \right)}.$$

## References

- [1] Emmanuel Abbe, Enric Boix Adsera, and Theodor Misiakiewicz. Sgd learning on neural networks: leap complexity and saddle-to-saddle dynamics. In *The Thirty Sixth Annual Conference on Learning Theory*, pages 2552–2623. PMLR, 2023.
- [2] Gerard Ben Arous, Reza Gheissari, and Aukosh Jagannath. Online stochastic gradient descent on non-convex losses from high-dimensional inference. *Journal of Machine Learning Research*, 22(106):1–51, 2021.
- [3] William Beckner. Sobolev inequalities, the poisson semigroup, and analysis on the sphere  $S^n$ . *Proceedings of the National Academy of Sciences*, 89(11):4816–4819, 1992.
- [4] Raphaël Berthier, Andrea Montanari, and Kangjie Zhou. Learning time-scales in two-layers neural networks. *Foundations of Computational Mathematics*, pages 1–84, 2024.
- [5] Alberto Bietti, Joan Bruna, and Loucas Pillaud-Vivien. On learning gaussian multi-index models with gradient flow. *arXiv preprint arXiv:2310.19793*, 2023.
- [6] Alberto Bietti, Joan Bruna, Clayton Sanford, and Min Jae Song. Learning single-index models with shallow neural networks. *Advances in Neural Information Processing Systems*, 35:9768–9783, 2022.
- [7] Giulio Biroli, Chiara Cammarota, and Federico Ricci-Tersenghi. How to iron out rough landscapes and get optimal performances: averaged gradient descent and its application to tensor pca. *Journal of Physics A: Mathematical and Theoretical*, 53(17):174003, 2020.
- [8] George EP Box and David R Cox. An analysis of transformations. *Journal of the Royal Statistical Society Series B: Statistical Methodology*, 26(2):211–243, 1964.
- [9] Joan Bruna and Daniel Hsu. Survey on algorithms for multi-index models. *arXiv preprint arXiv:2504.05426*, 2025.
- [10] Nader H Bshouty and Vitaly Feldman. On using extended statistical queries to avoid membership queries. *Journal of Machine Learning Research*, 2(Feb):359–395, 2002.
- [11] Theodore S Chihara. *An introduction to orthogonal polynomials*. Courier Corporation, 2011.
- [12] Feng Dai. *Approximation theory and harmonic analysis on spheres and balls*. Springer, 2013.
- [13] Arnak S Dalalyan, Anatoly Juditsky, and Vladimir Spokoiny. A new algorithm for estimating the effective dimension-reduction subspace. *The Journal of Machine Learning Research*, 9:1647–1678, 2008.
- [14] Alex Damian, Eshaan Nichani, Rong Ge, and Jason D Lee. Smoothing the landscape boosts the signal for sgd: Optimal sample complexity for learning single index models. *Advances in Neural Information Processing Systems*, 36, 2024.
- [15] Alex Damian, Loucas Pillaud-Vivien, Jason Lee, and Joan Bruna. Computational-statistical gaps in gaussian single-index models. In *The Thirty Seventh Annual Conference on Learning Theory*, pages 1262–1262. PMLR, 2024.
- [16] Alexandru Damian, Jason Lee, and Mahdi Soltanolkotabi. Neural networks can learn representations with gradient descent. In *Conference on Learning Theory*, pages 5413–5452. PMLR, 2022.
- [17] Yatin Dandi, Florent Krzakala, Bruno Loureiro, Luca Pesce, and Ludovic Stephan. How two-layer neural networks learn, one (giant) step at a time. *arXiv preprint arXiv:2305.18270*, 2023.
- [18] Yatin Dandi, Emanuele Troiani, Luca Arnaboldi, Luca Pesce, Lenka Zdeborová, and Florent Krzakala. The benefits of reusing batches for gradient descent in two-layer networks: Breaking the curse of information and leap exponents. *arXiv preprint arXiv:2402.03220*, 2024.

- [19] Victor H. de la Peña and Stephen J. Montgomery-Smith. Decoupling inequalities for the tail probabilities of multivariate u-statistics, 1999.
- [20] *NIST Digital Library of Mathematical Functions*. <https://dlmf.nist.gov/>, Release 1.2.3 of 2024-12-15. F. W. J. Olver, A. B. Olde Daalhuis, D. W. Lozier, B. I. Schneider, R. F. Boisvert, C. W. Clark, B. R. Miller, B. V. Saunders, H. S. Cohl, and M. A. McClain, eds.
- [21] Rishabh Dudeja and Daniel Hsu. Learning single-index models in gaussian space. In *Conference On Learning Theory*, pages 1887–1930. PMLR, 2018.
- [22] Rishabh Dudeja and Daniel Hsu. Statistical-computational trade-offs in tensor pca and related problems via communication complexity. *The Annals of Statistics*, 52(1):131–156, 2024.
- [23] Wolfgang Härdle and Thomas M Stoker. Investigating smooth multiple regression by the method of average derivatives. *Journal of the American statistical Association*, 84(408):986–995, 1989.
- [24] Samuel Hopkins. *Statistical inference and the sum of squares method*. PhD thesis, Cornell University, 2018.
- [25] Samuel B Hopkins, Tselil Schramm, Jonathan Shi, and David Steurer. Fast spectral algorithms from sum-of-squares proofs: tensor decomposition and planted sparse vectors. In *Proceedings of the forty-eighth annual ACM symposium on Theory of Computing*, pages 178–191, 2016.
- [26] Samuel B. Hopkins, Jonathan Shi, and David Steurer. Tensor principal component analysis via sum-of-square proofs. In Peter Grünwald, Elad Hazan, and Satyen Kale, editors, *Proceedings of The 28th Conference on Learning Theory*, volume 40 of *Proceedings of Machine Learning Research*, pages 956–1006, Paris, France, 03–06 Jul 2015. PMLR.
- [27] Hidehiko Ichimura. Semiparametric least squares (sls) and weighted sls estimation of single-index models. *Journal of econometrics*, 58(1-2):71–120, 1993.
- [28] Nirmal Joshi, Theodor Misiakiewicz, and Nathan Srebro. On the complexity of learning sparse functions with statistical and gradient queries. *arXiv preprint arXiv:2407.05622*, 2024.
- [29] Sham M Kakade, Varun Kanade, Ohad Shamir, and Adam Kalai. Efficient learning of generalized linear and single index models with isotonic regression. *Advances in Neural Information Processing Systems*, 24, 2011.
- [30] Adam Tauman Kalai and Ravi Sastry. The isotron algorithm: High-dimensional isotonic regression. In *COLT*, volume 1, page 9, 2009.
- [31] Michael Kearns. Efficient noise-tolerant learning from statistical queries. *Journal of the ACM (JACM)*, 45(6):983–1006, 1998.
- [32] Dmitriy Kunisky, Alexander S Wein, and Afonso S Bandeira. Notes on computational hardness of hypothesis testing: Predictions using the low-degree likelihood ratio. In *ISAAC Congress (International Society for Analysis, its Applications and Computation)*, pages 1–50. Springer, 2019.
- [33] Ker-Chau Li. Sliced inverse regression for dimension reduction. *Journal of the American Statistical Association*, 86(414):316–327, 1991.
- [34] Juan Carlos López Carreño, Rosalba Mendoza Suárez, and Jairo Alonso Mendoza S. Connection between the hermite and gegenbauer polynomials using the lewanowicz method. *International Journal of Mathematics & Computer Science*, 18(4), 2023.
- [35] Peter McCullagh. Generalized linear models. *European Journal of Operational Research*, 16(3):285–292, 1984.
- [36] Song Mei, Yu Bai, and Andrea Montanari. The landscape of empirical risk for nonconvex losses. *The Annals of Statistics*, 46(6A):2747–2774, 2018.
- [37] Marco Mondelli and Andrea Montanari. Fundamental limits of weak recovery with applications to phase retrieval. In *Conference On Learning Theory*, pages 1445–1450. PMLR, 2018.

- 1663 [38] Andrea Montanari and Emile Richard. A statistical model for tensor pca. *Advances in neural*  
1664 *information processing systems*, 27, 2014.
- 1665 [39] Lev Reyzin. Statistical queries and statistical algorithms: Foundations and applications. *arXiv*  
1666 *preprint arXiv:2004.00557*, 2020.
- 1667 [40] Tselil Schramm and Alexander S Wein. Computational barriers to estimation from low-degree  
1668 polynomials. *The Annals of Statistics*, 50(3):1833–1858, 2022.
- 1669 [41] Min Jae Song, Ilias Zadik, and Joan Bruna. On the cryptographic hardness of learning single  
1670 periodic neurons. *Advances in neural information processing systems*, 34:29602–29615, 2021.
- 1671 [42] Gabor Szeg. *Orthogonal polynomials*, volume 23. American Mathematical Soc., 1939.
- 1672 [43] Yan Shuo Tan and Roman Vershynin. Online stochastic gradient descent with arbitrary initial-  
1673 ization solves non-smooth, non-convex phase retrieval. *Journal of Machine Learning Research*,  
1674 24(58):1–47, 2023.
- 1675 [44] Joel A Tropp et al. An introduction to matrix concentration inequalities. *Foundations and*  
1676 *Trends® in Machine Learning*, 8(1-2):1–230, 2015.
- 1677 [45] Roman Vershynin. *High-dimensional probability: An introduction with applications in data*  
1678 *science*, volume 47. Cambridge university press, 2018.
- 1679 [46] Miaoyan Wang, Khanh Dao Duc, Jonathan Fischer, and Yun S. Song. Operator norm inequal-  
1680 ities between tensor unfoldings on the partition lattice. *Linear Algebra and its Applications*,  
1681 520:44–66, May 2017.
- 1682 [47] Alexander S Wein, Ahmed El Alaoui, and Cristopher Moore. The kikuchi hierarchy and tensor  
1683 pca. In *2019 IEEE 60th Annual Symposium on Foundations of Computer Science (FOCS)*,  
1684 pages 1446–1468. IEEE, 2019.
- 1685 [48] Wikipedia contributors. Gegenbauer polynomials — Wikipedia, the free encyclopedia, 2024.  
1686 [Online; accessed 28-December-2024].
- 1687 [49] Aaron Zweig, Loucas Pillaud-Vivien, and Joan Bruna. On single-index models beyond gaussian  
1688 data. *Advances in Neural Information Processing Systems*, 36, 2024.
